# Supplementary material for: Late Pleistocene temperature patterns in the Western Palearctic: insights from rodent associations compared with general circulation models
Source: Copernicus journal article supplement (doi:10.5194/cp-21-1821-2025), 2025-10-23

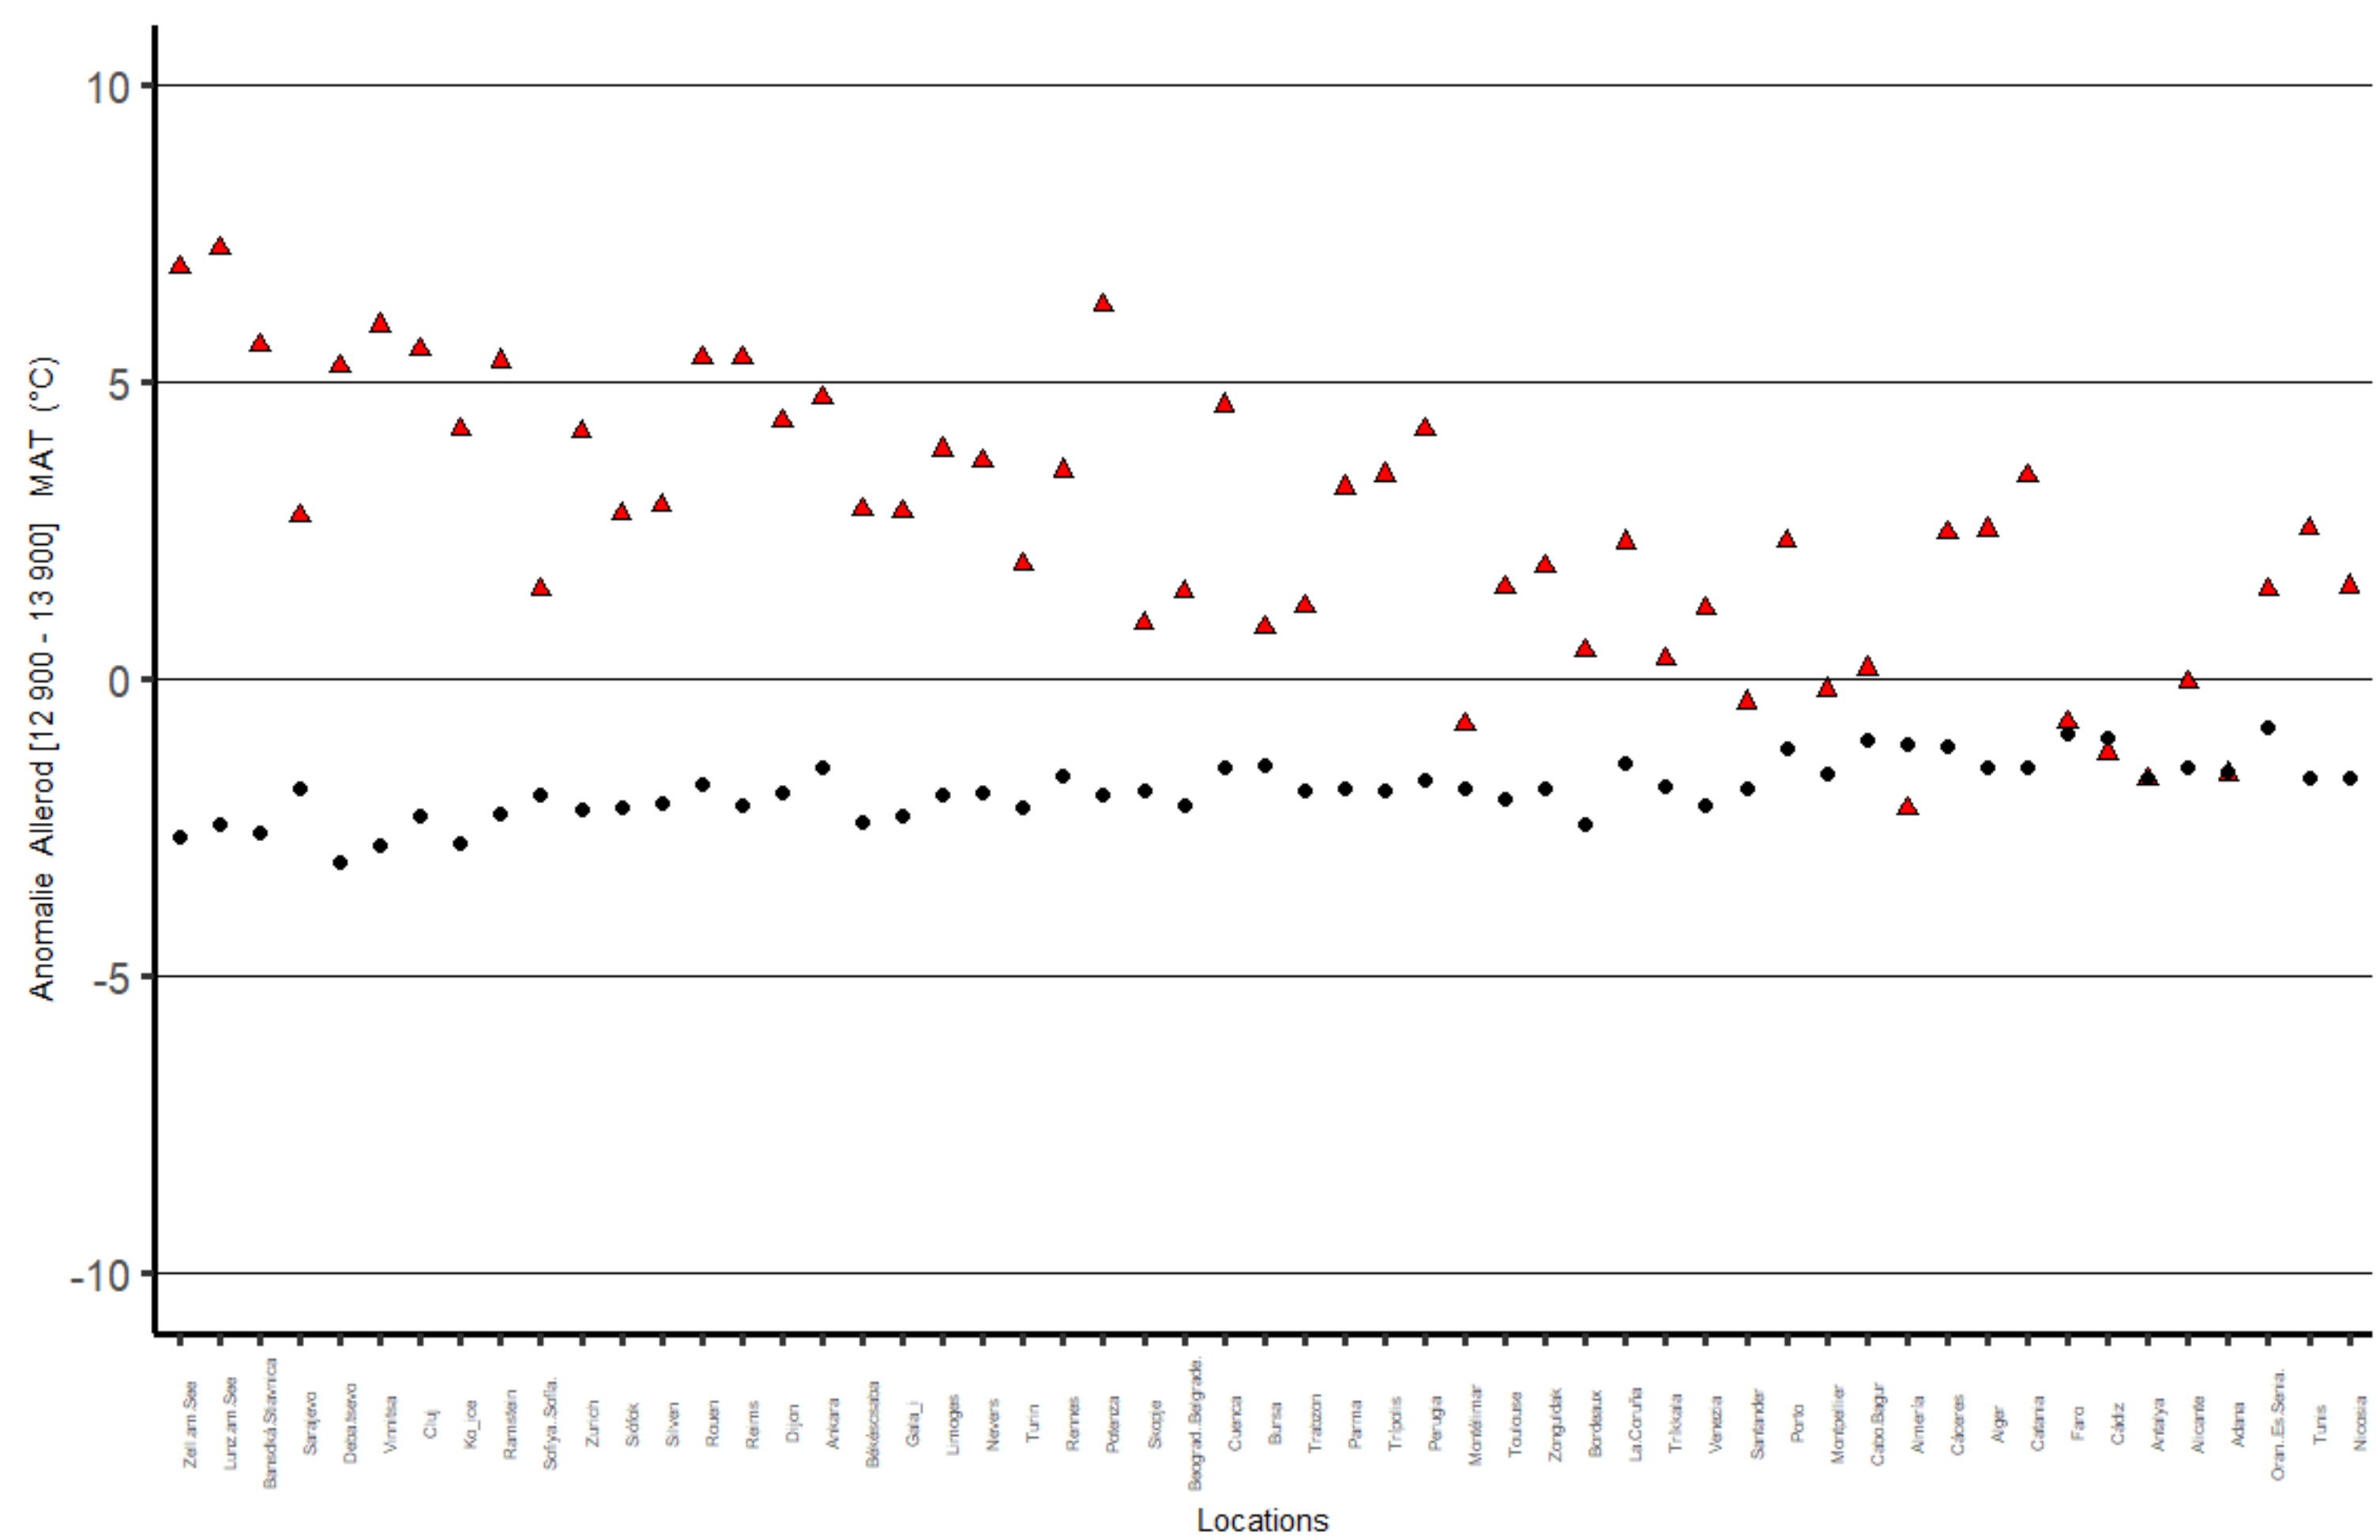

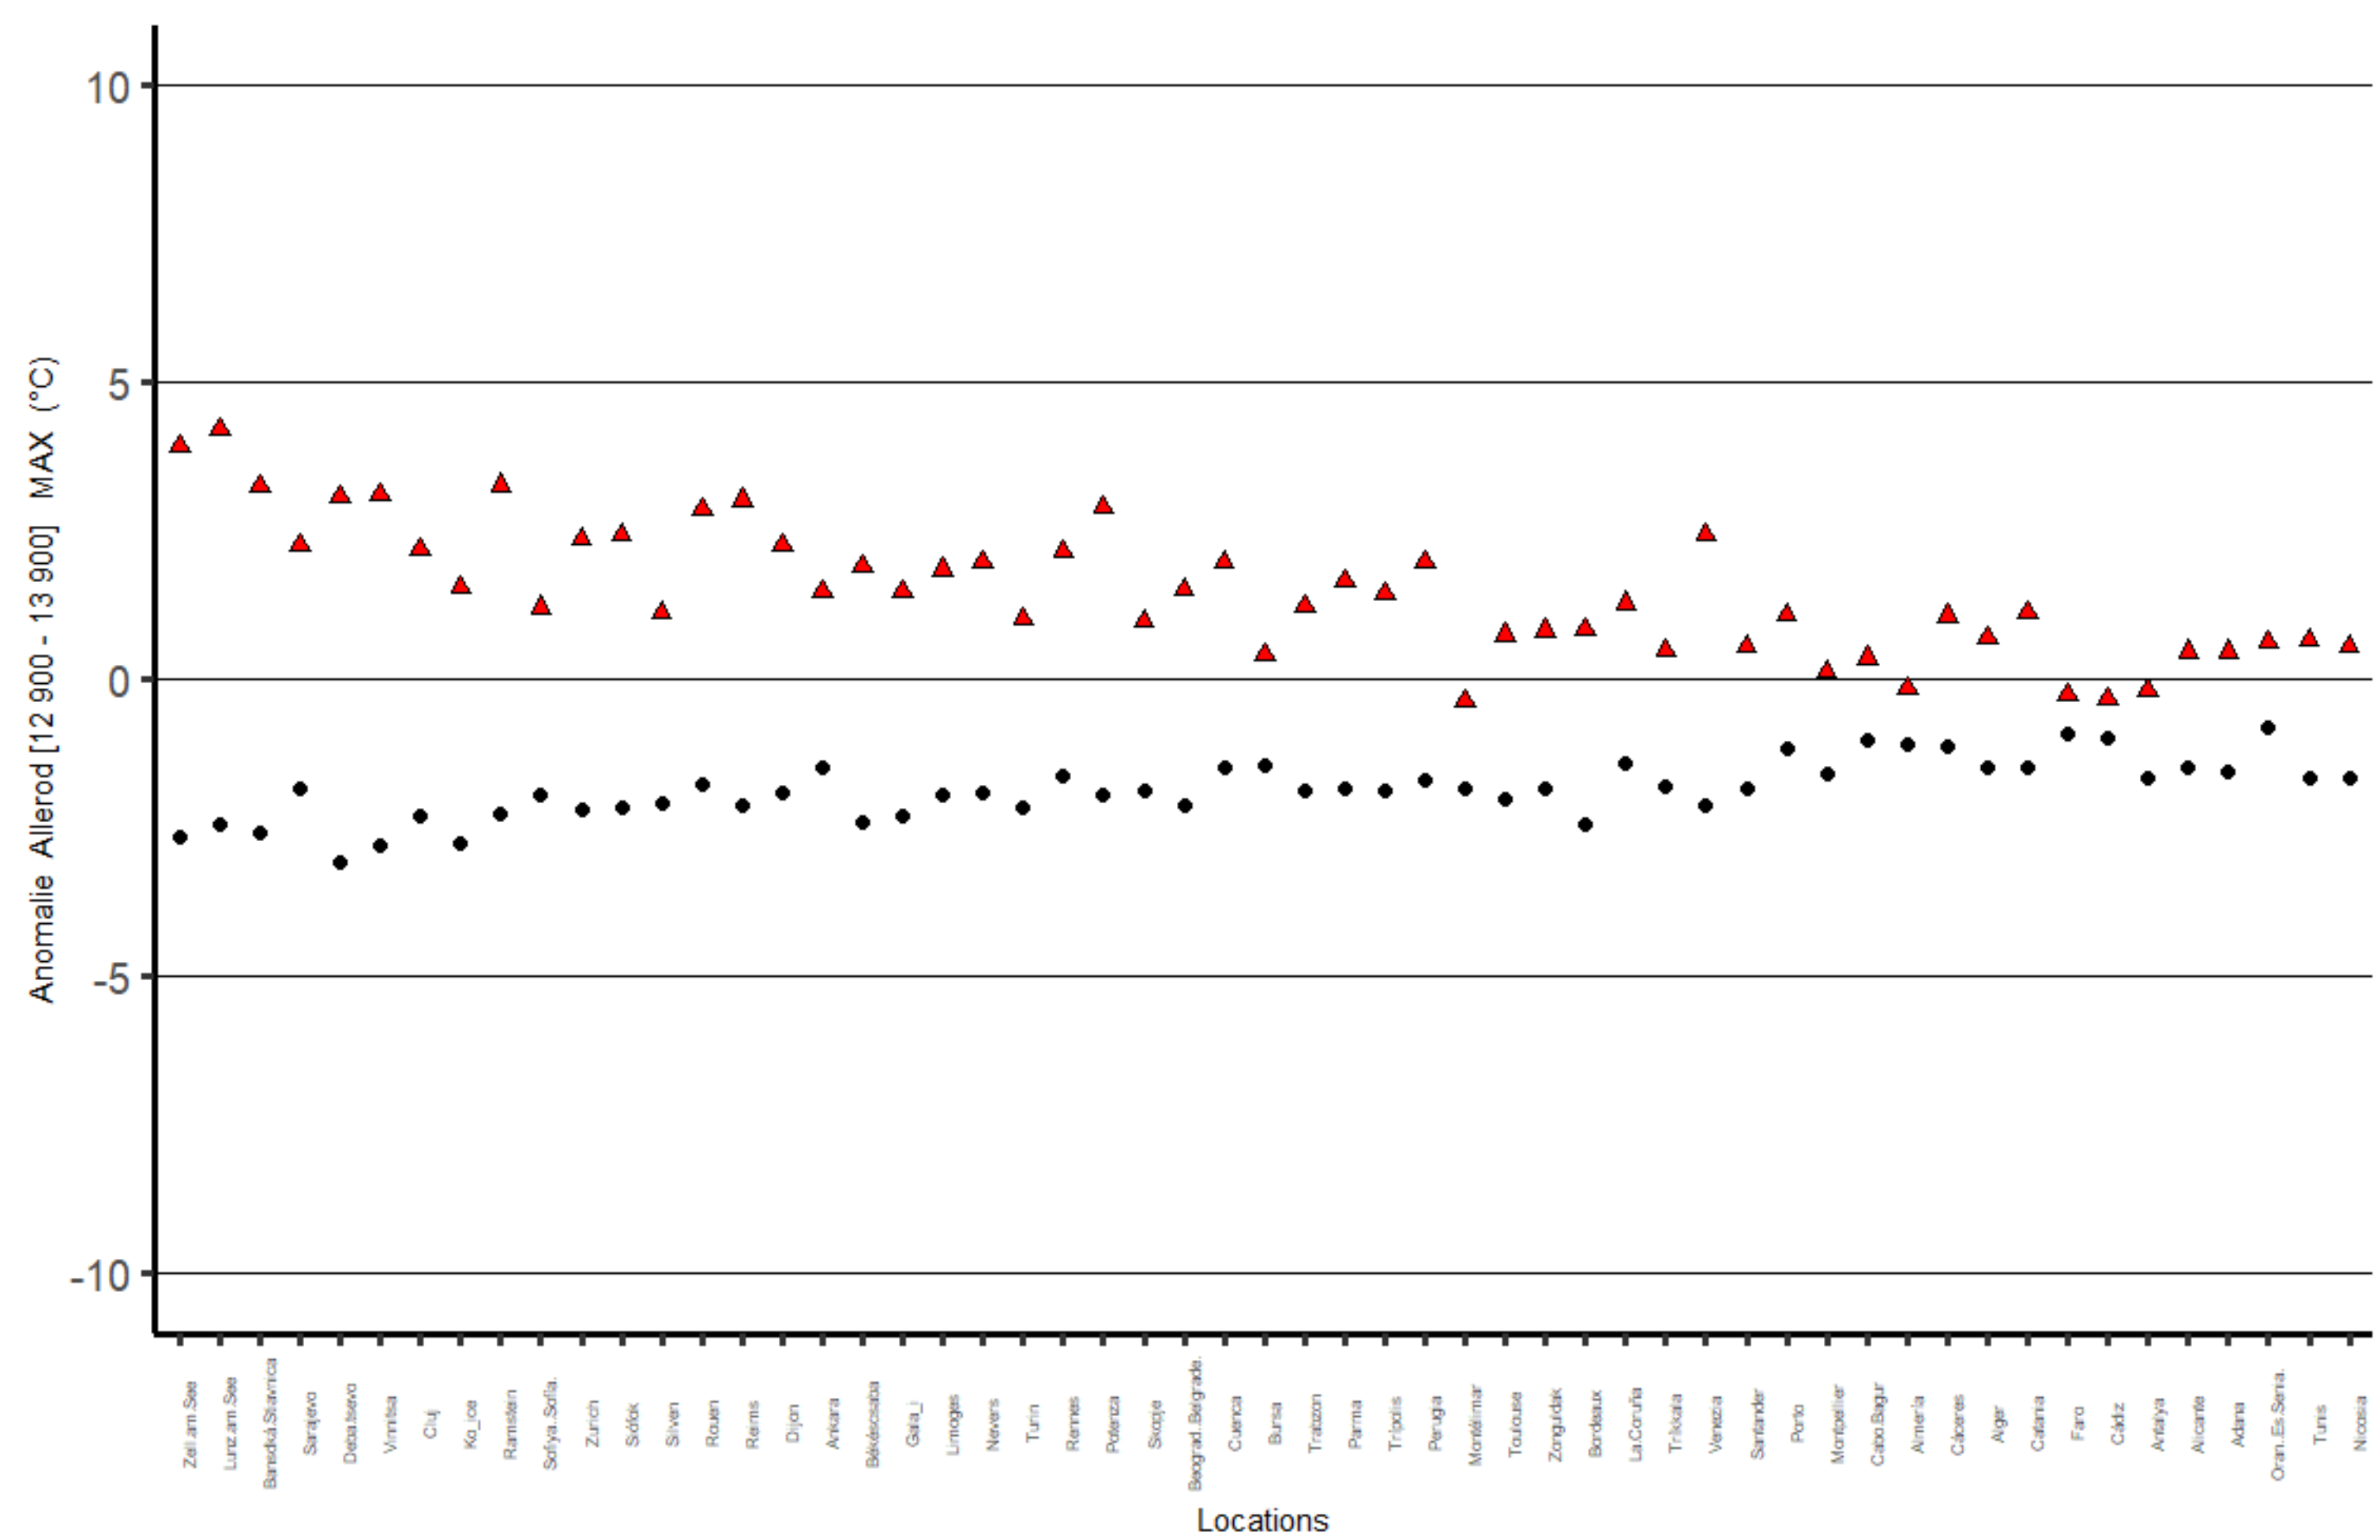

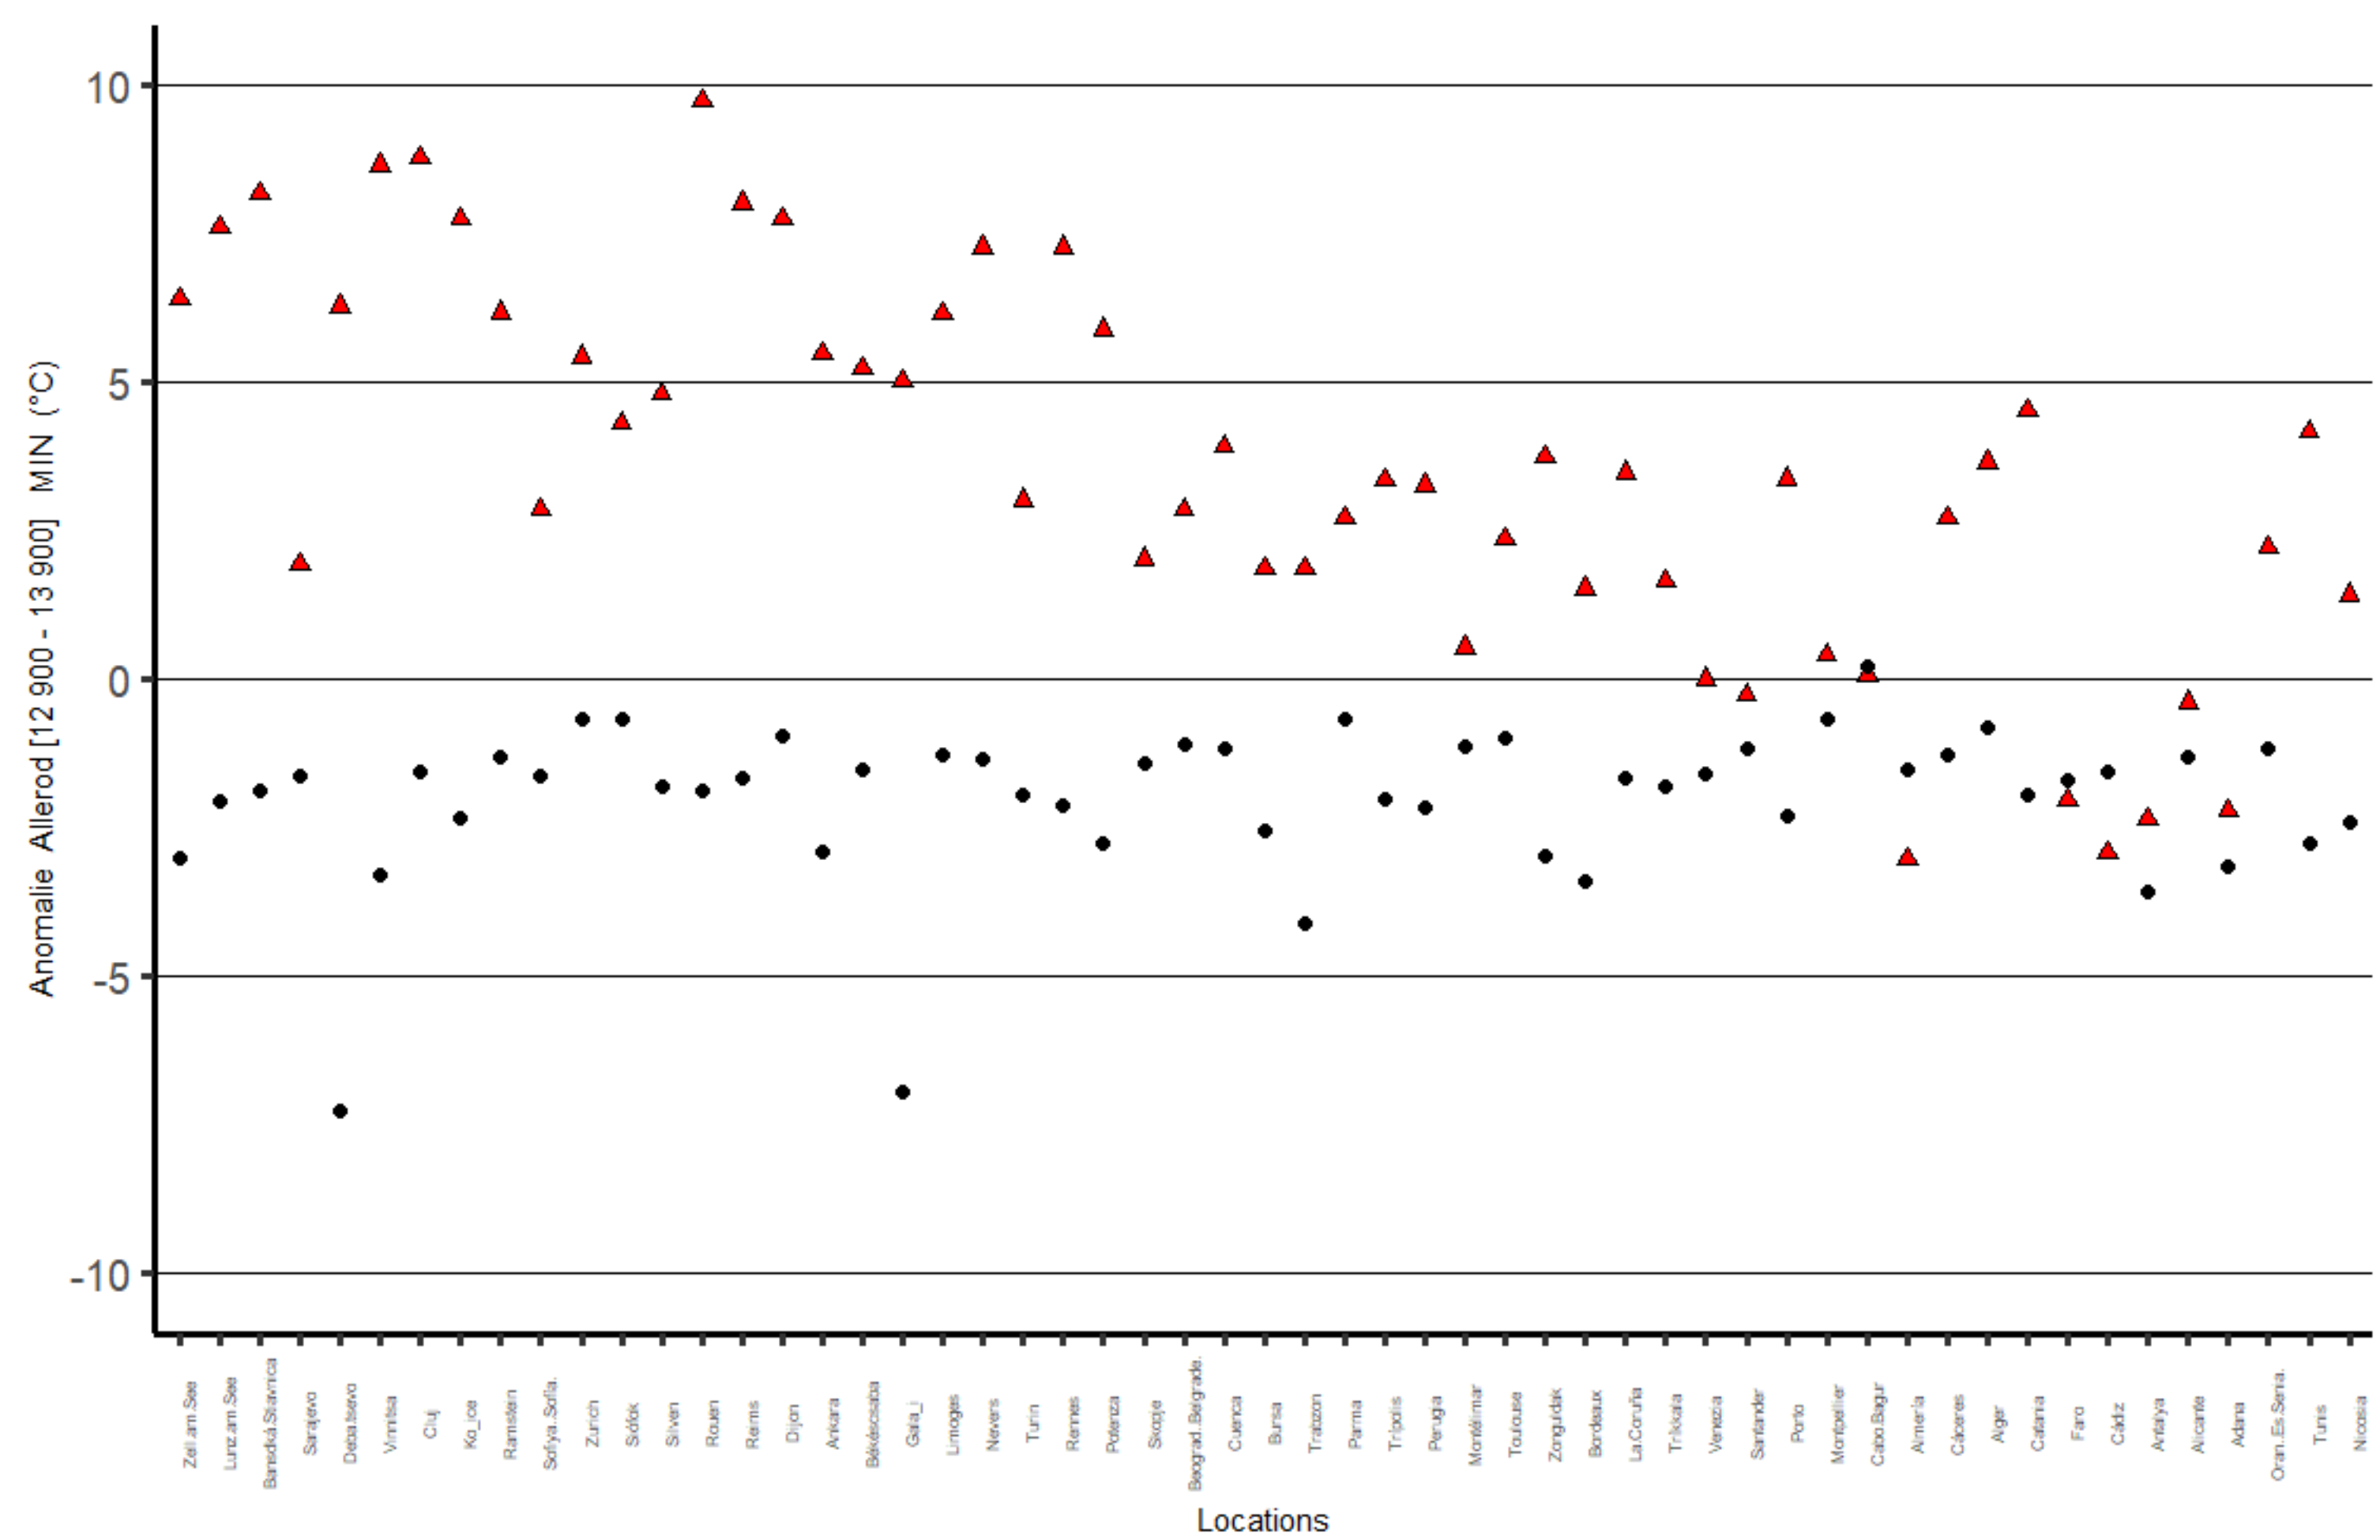

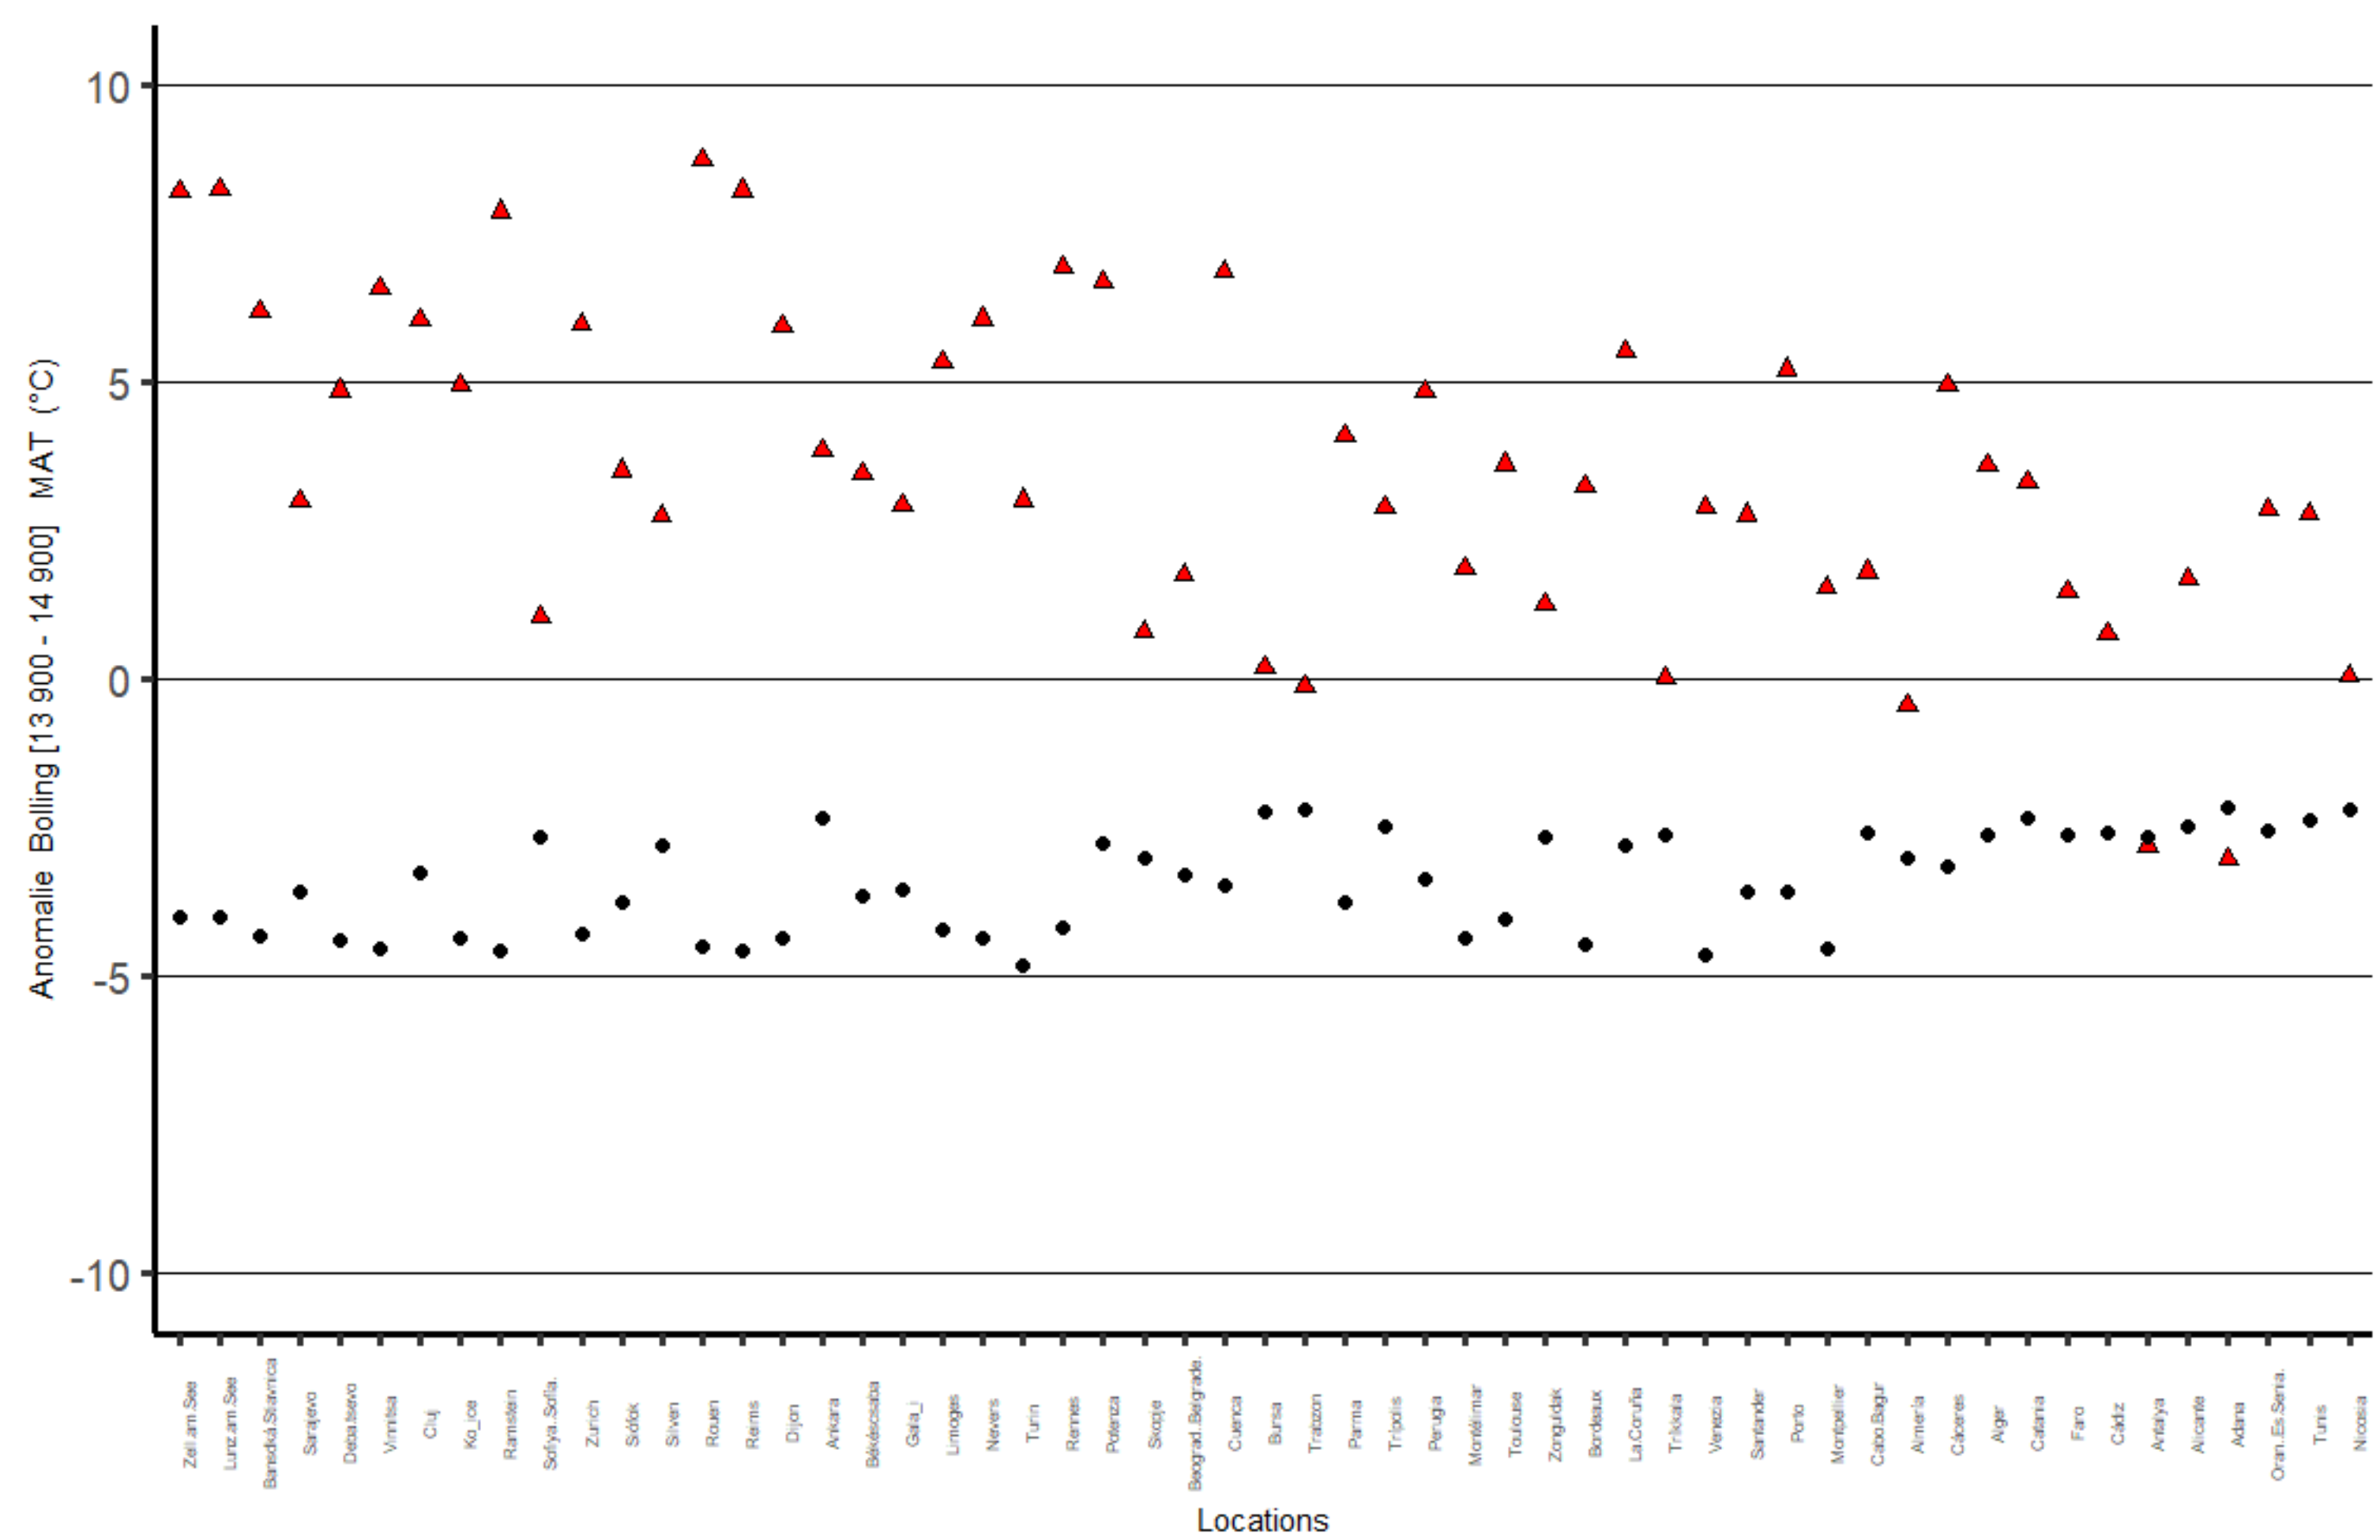

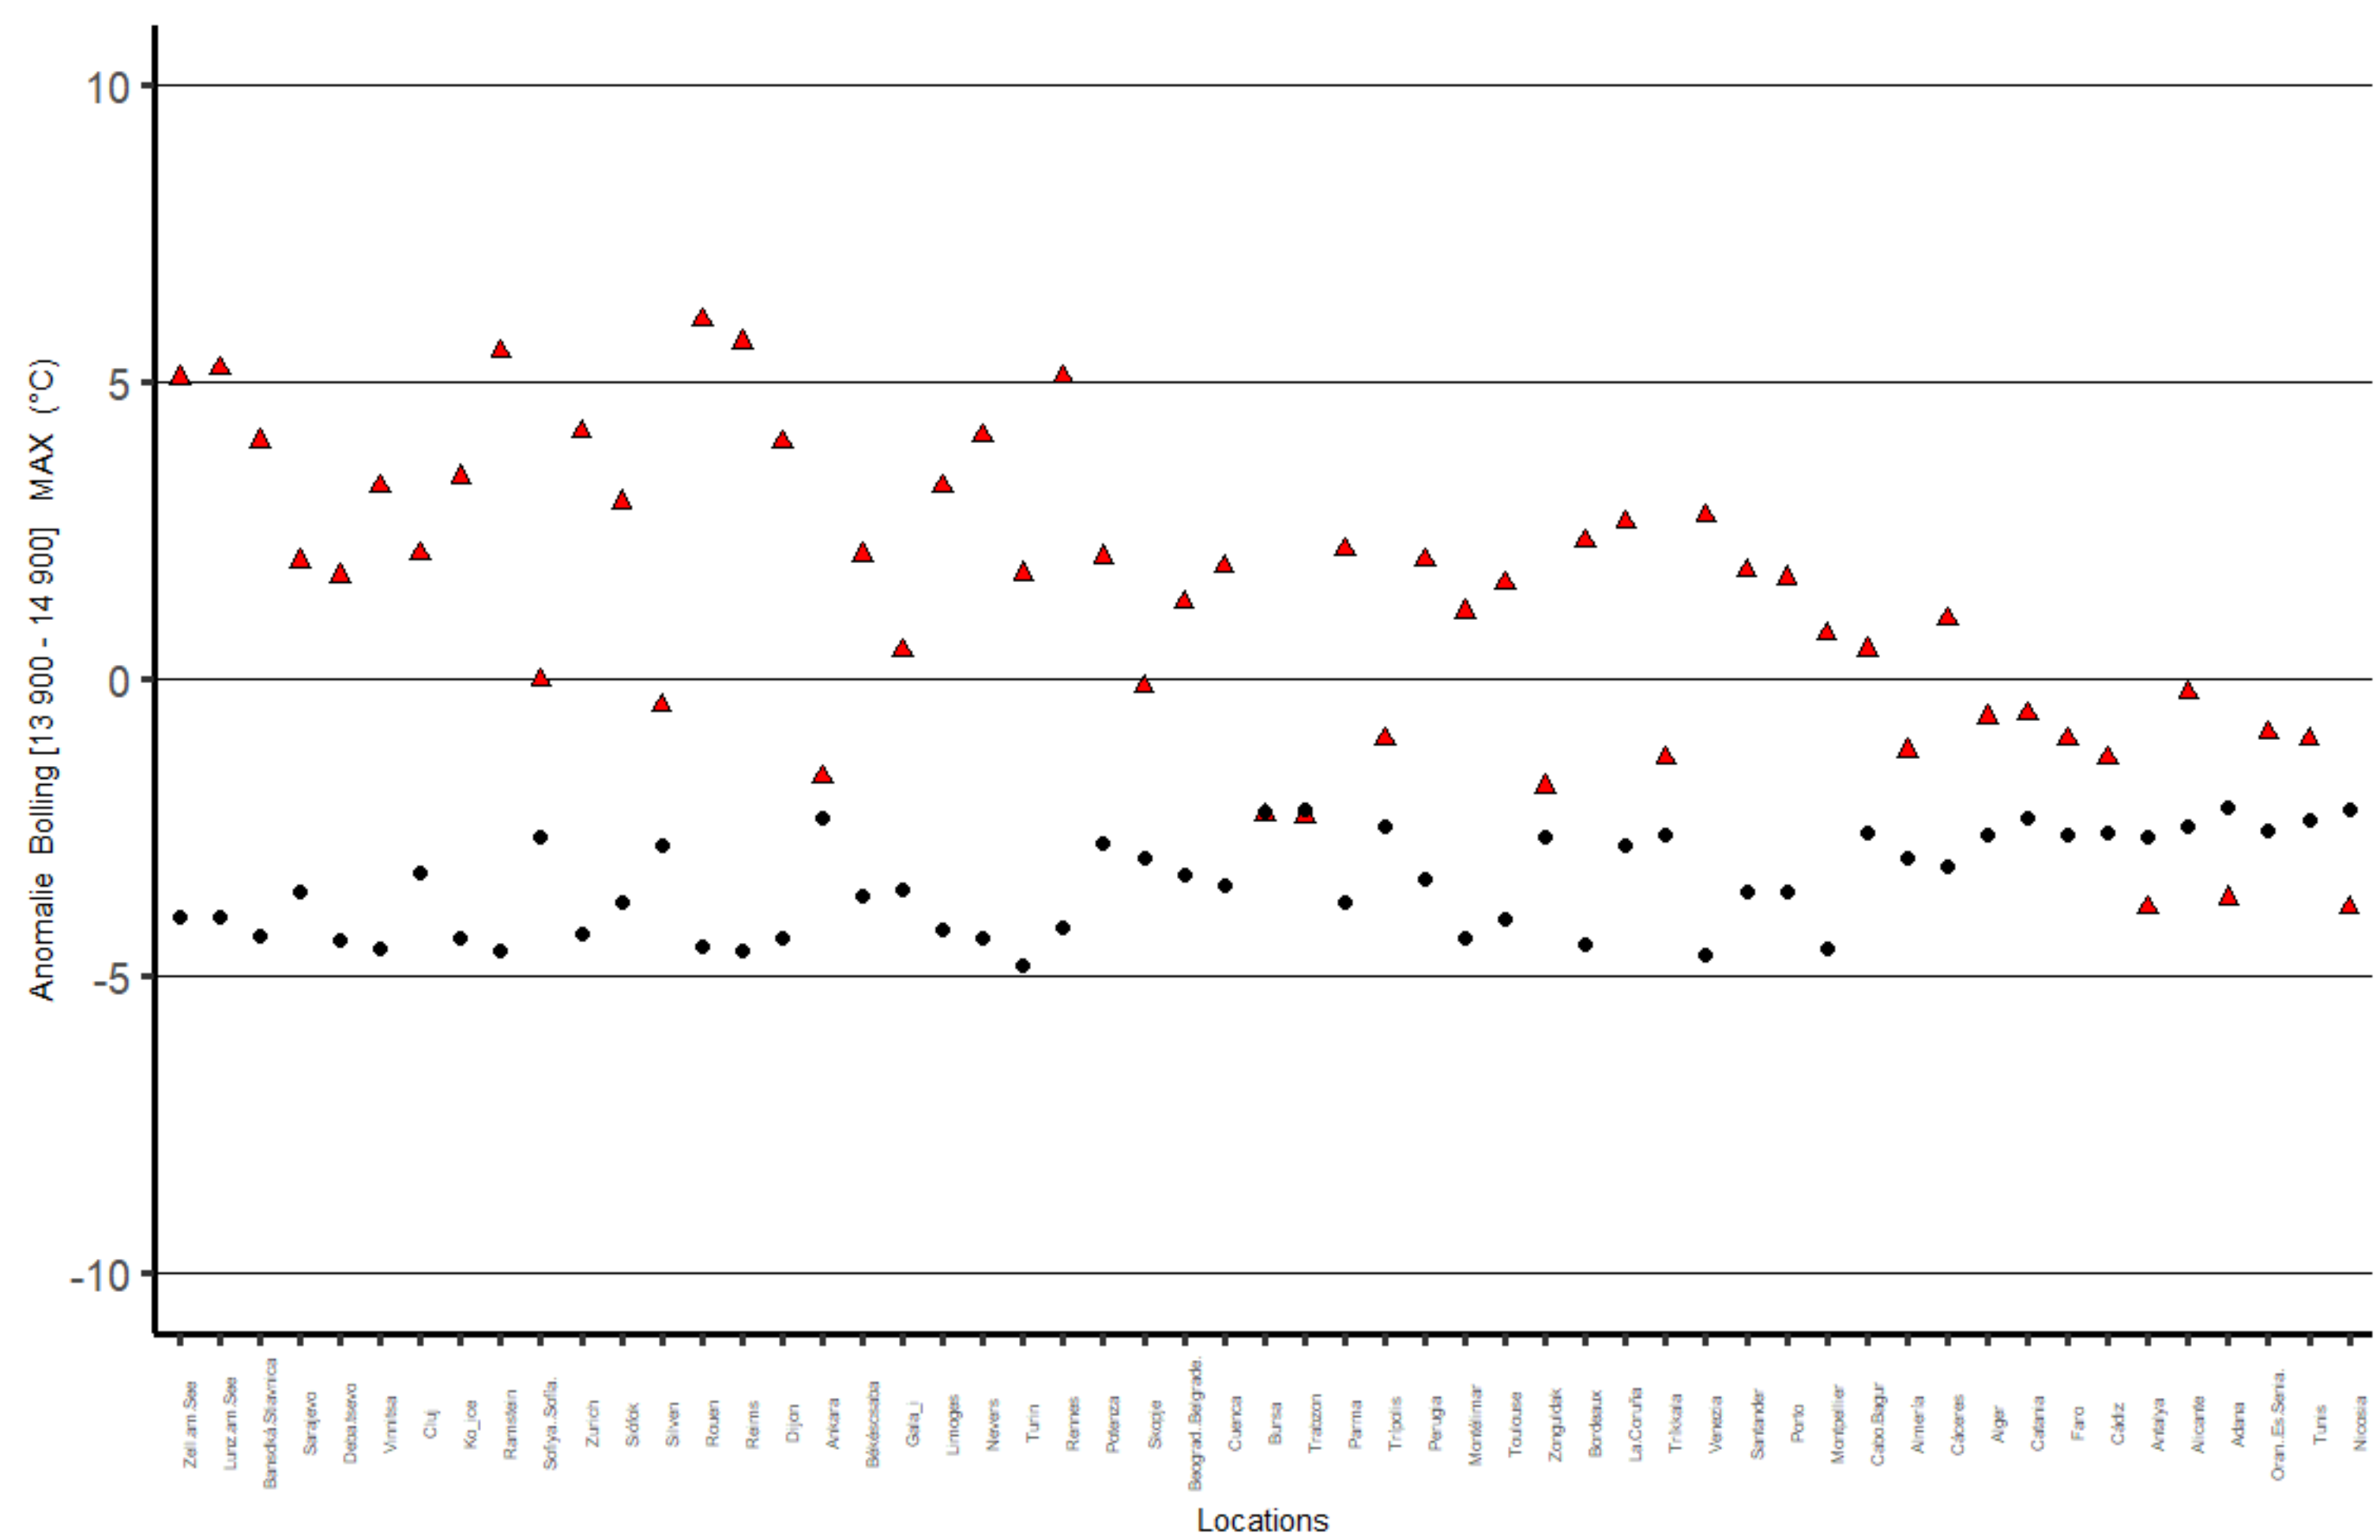

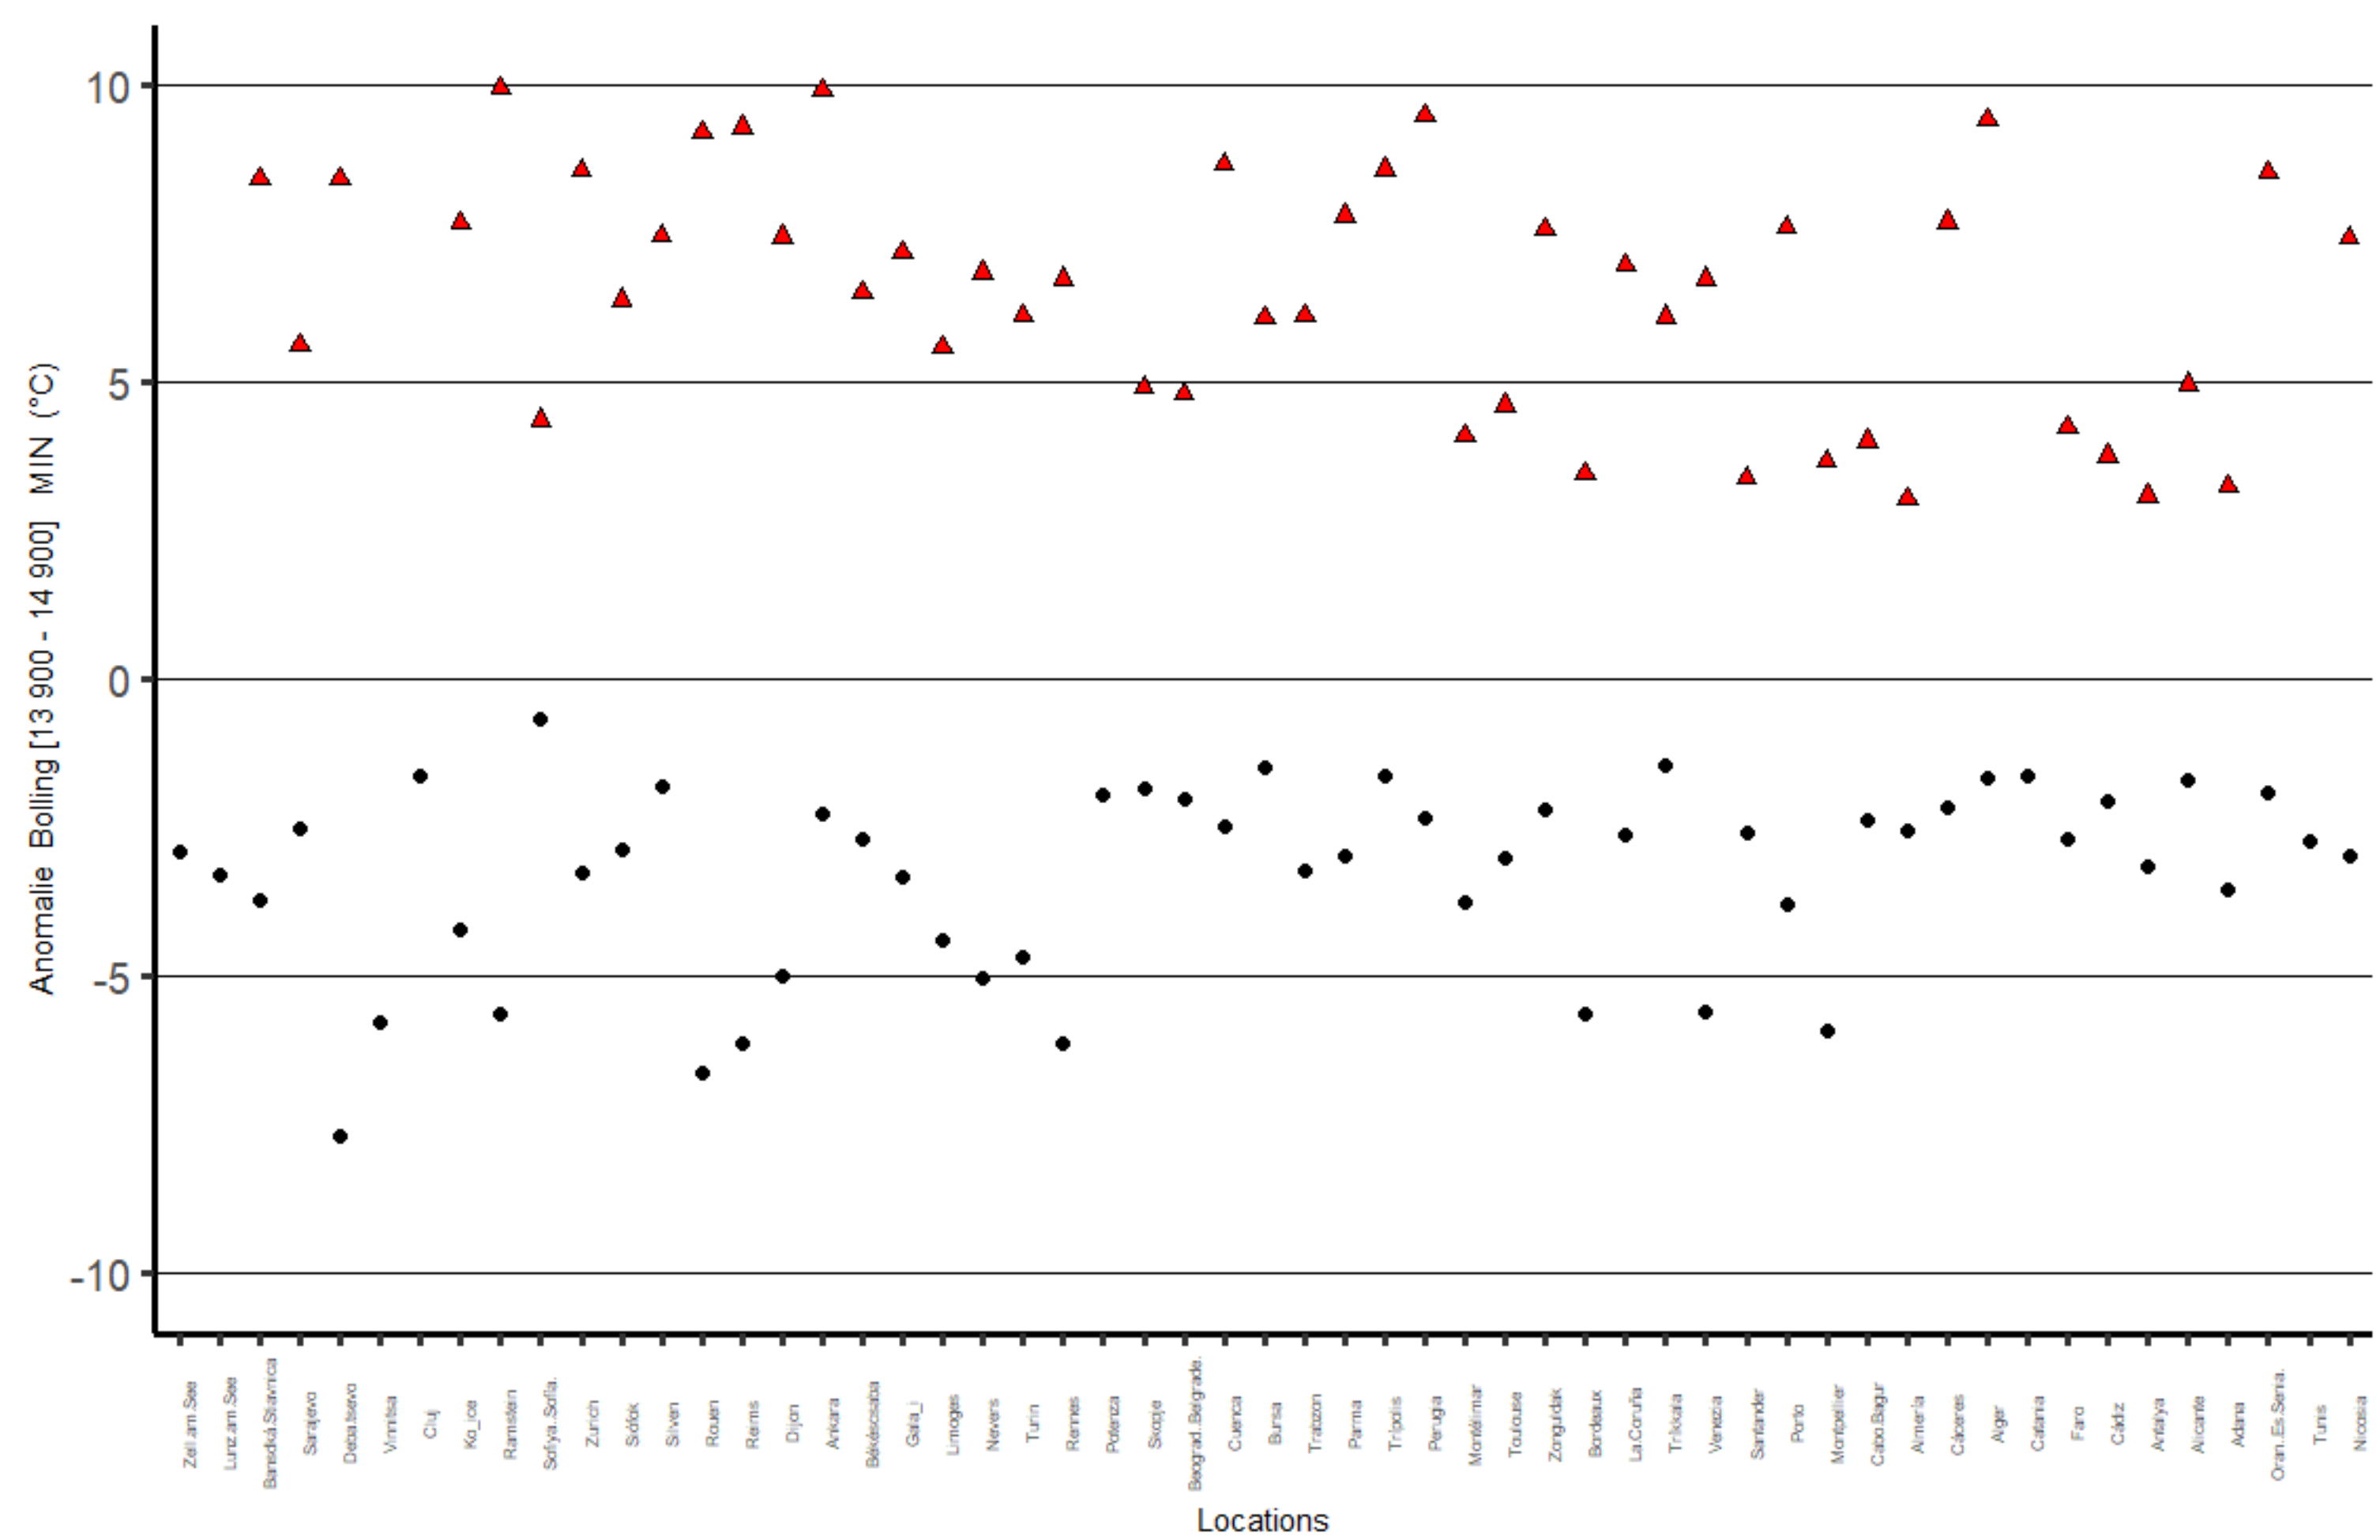

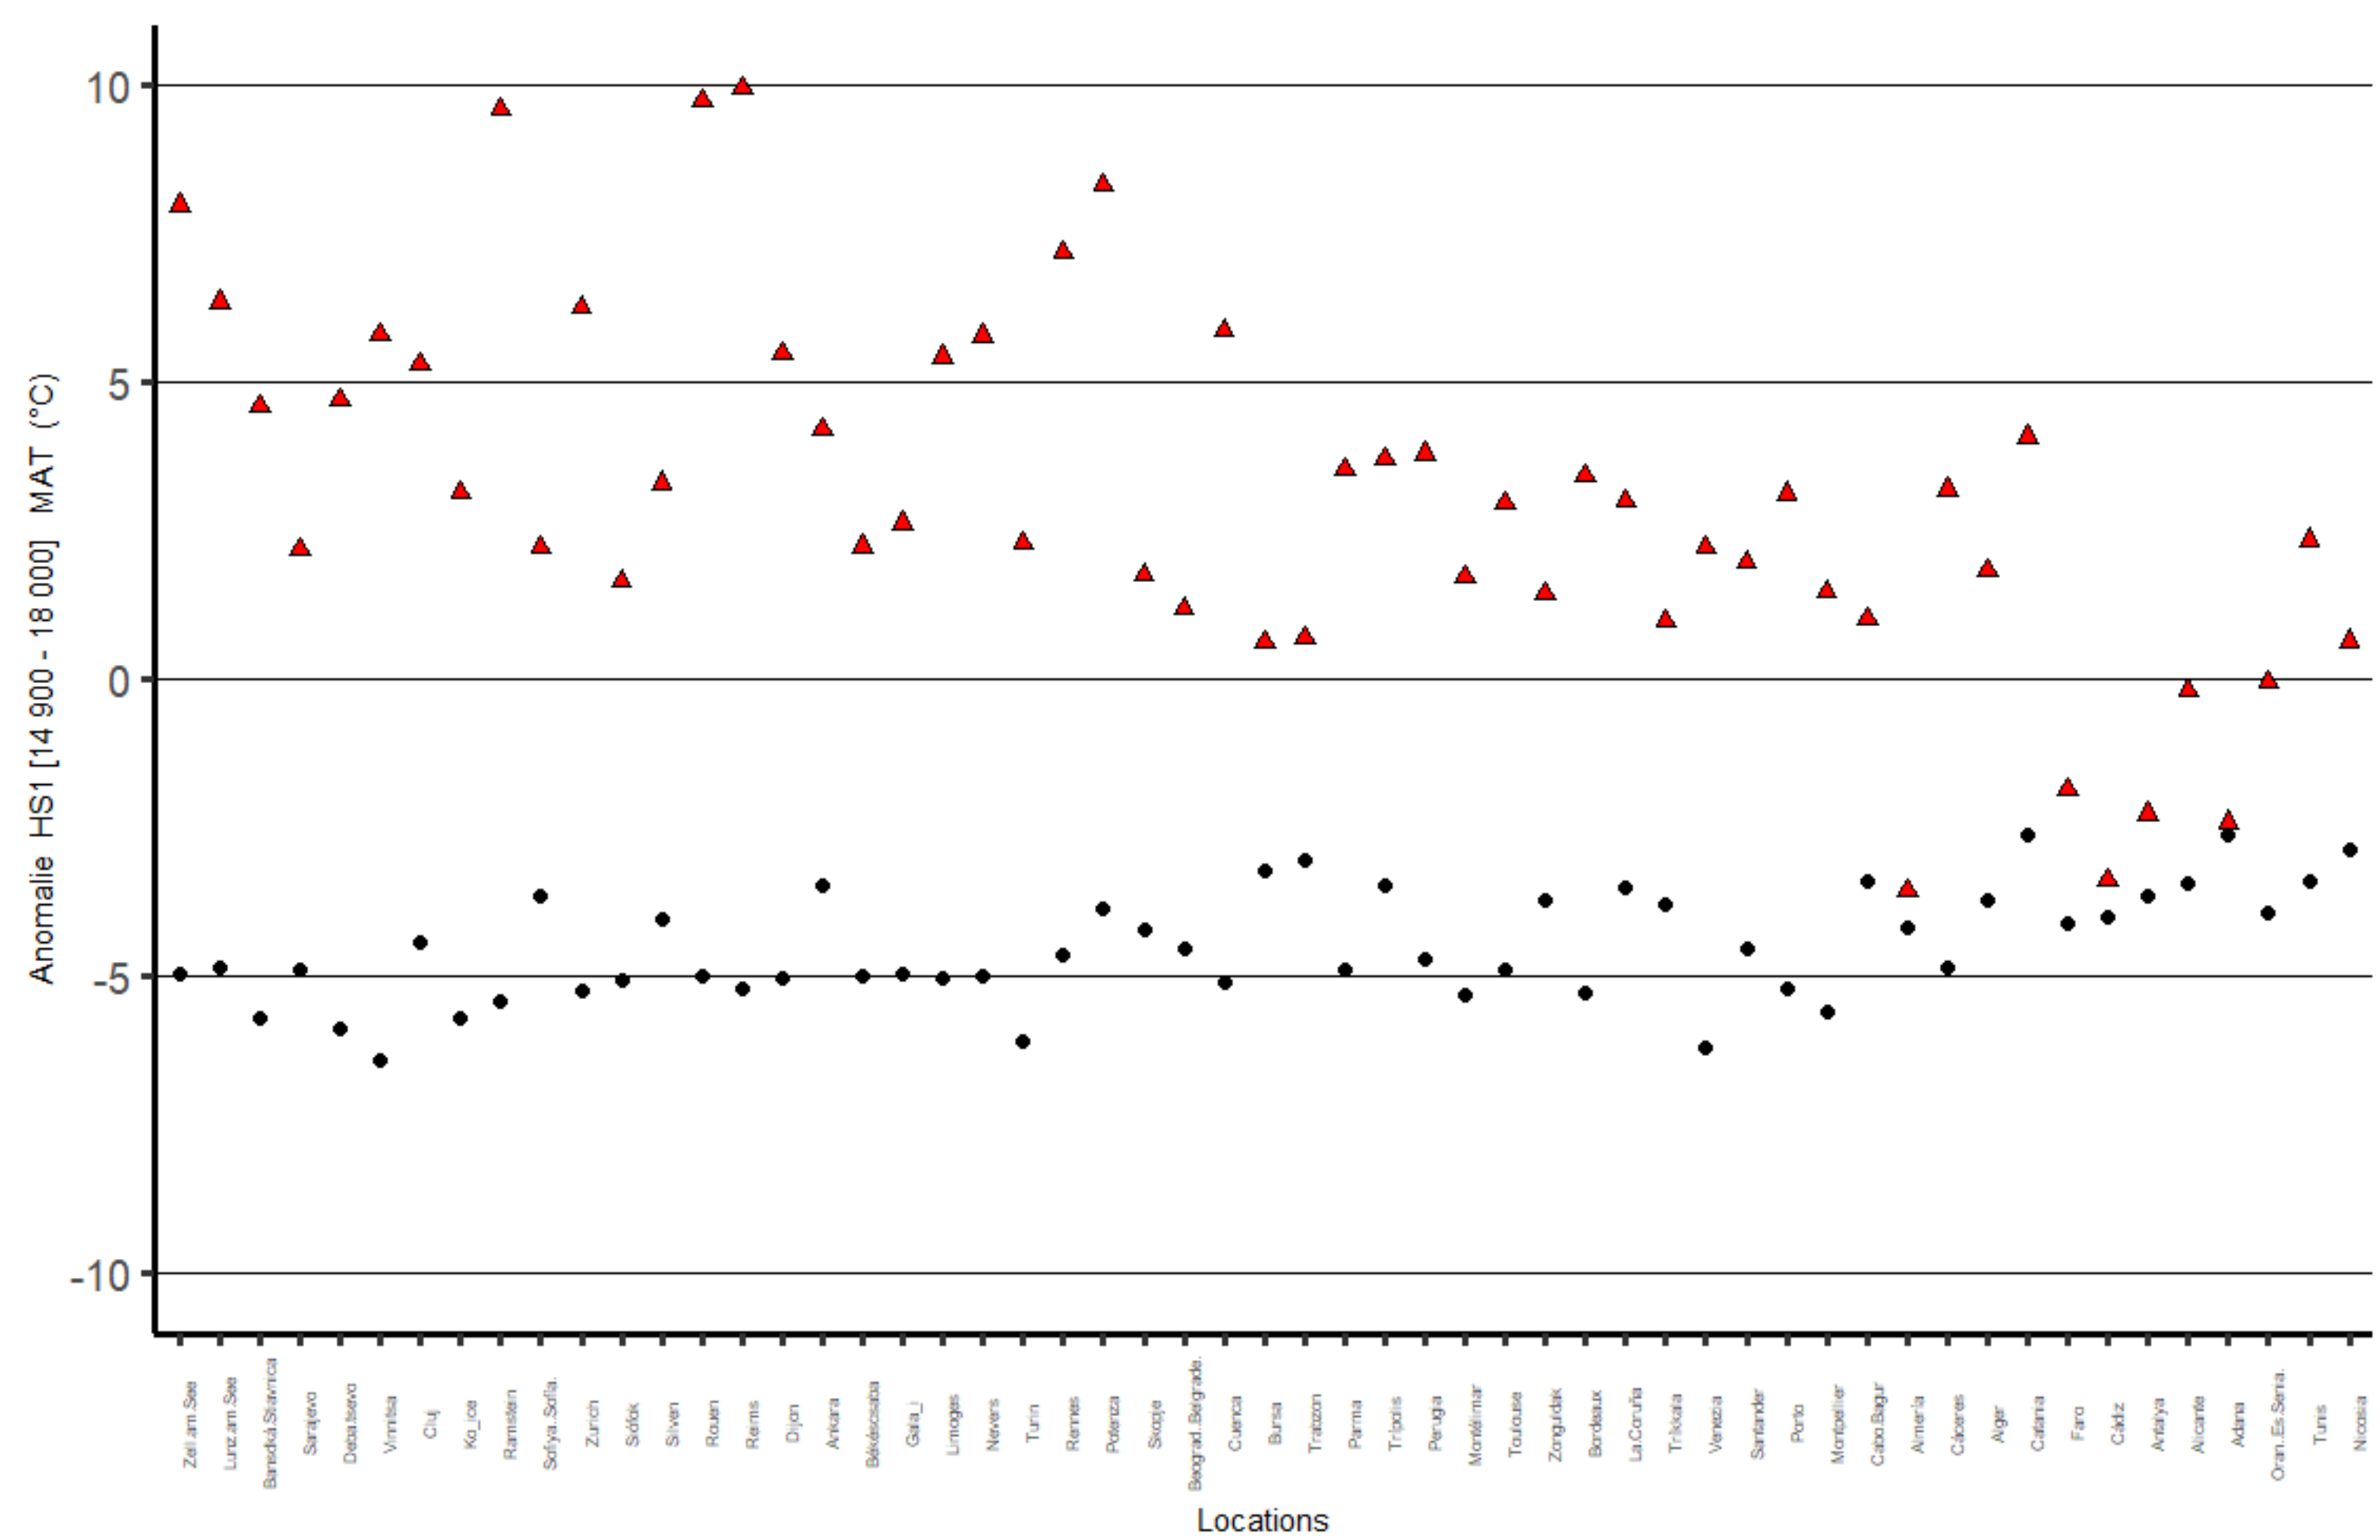

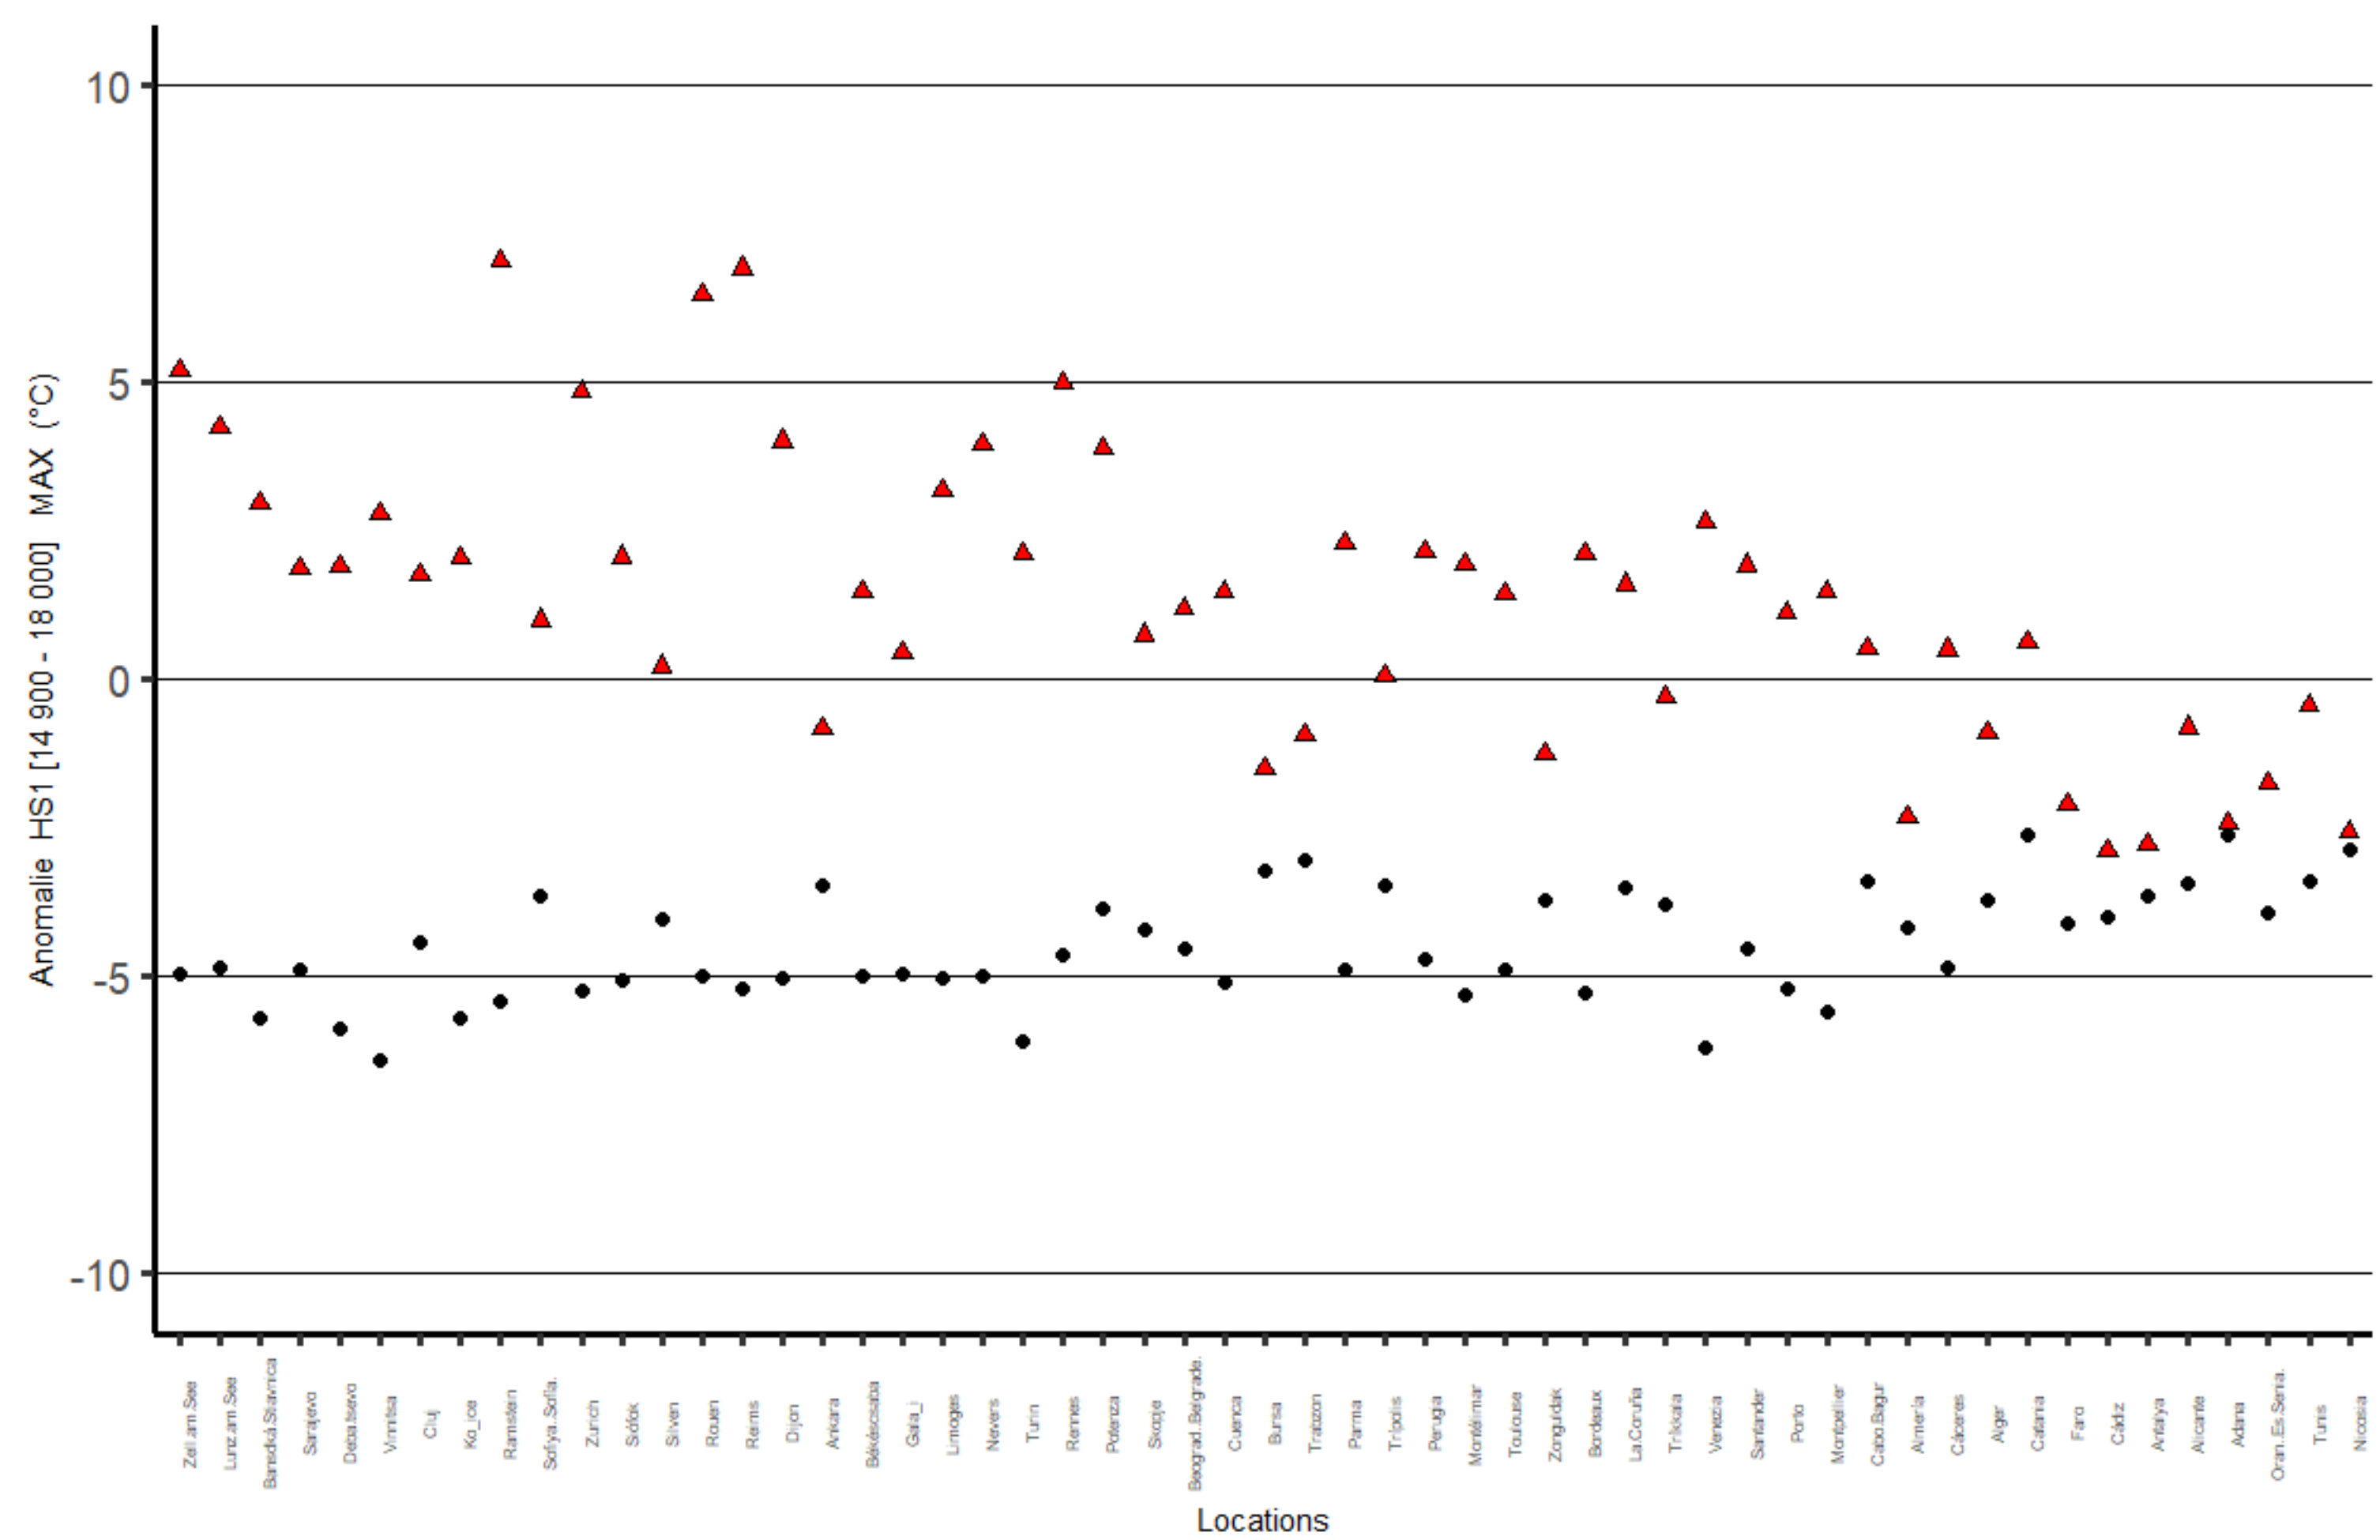



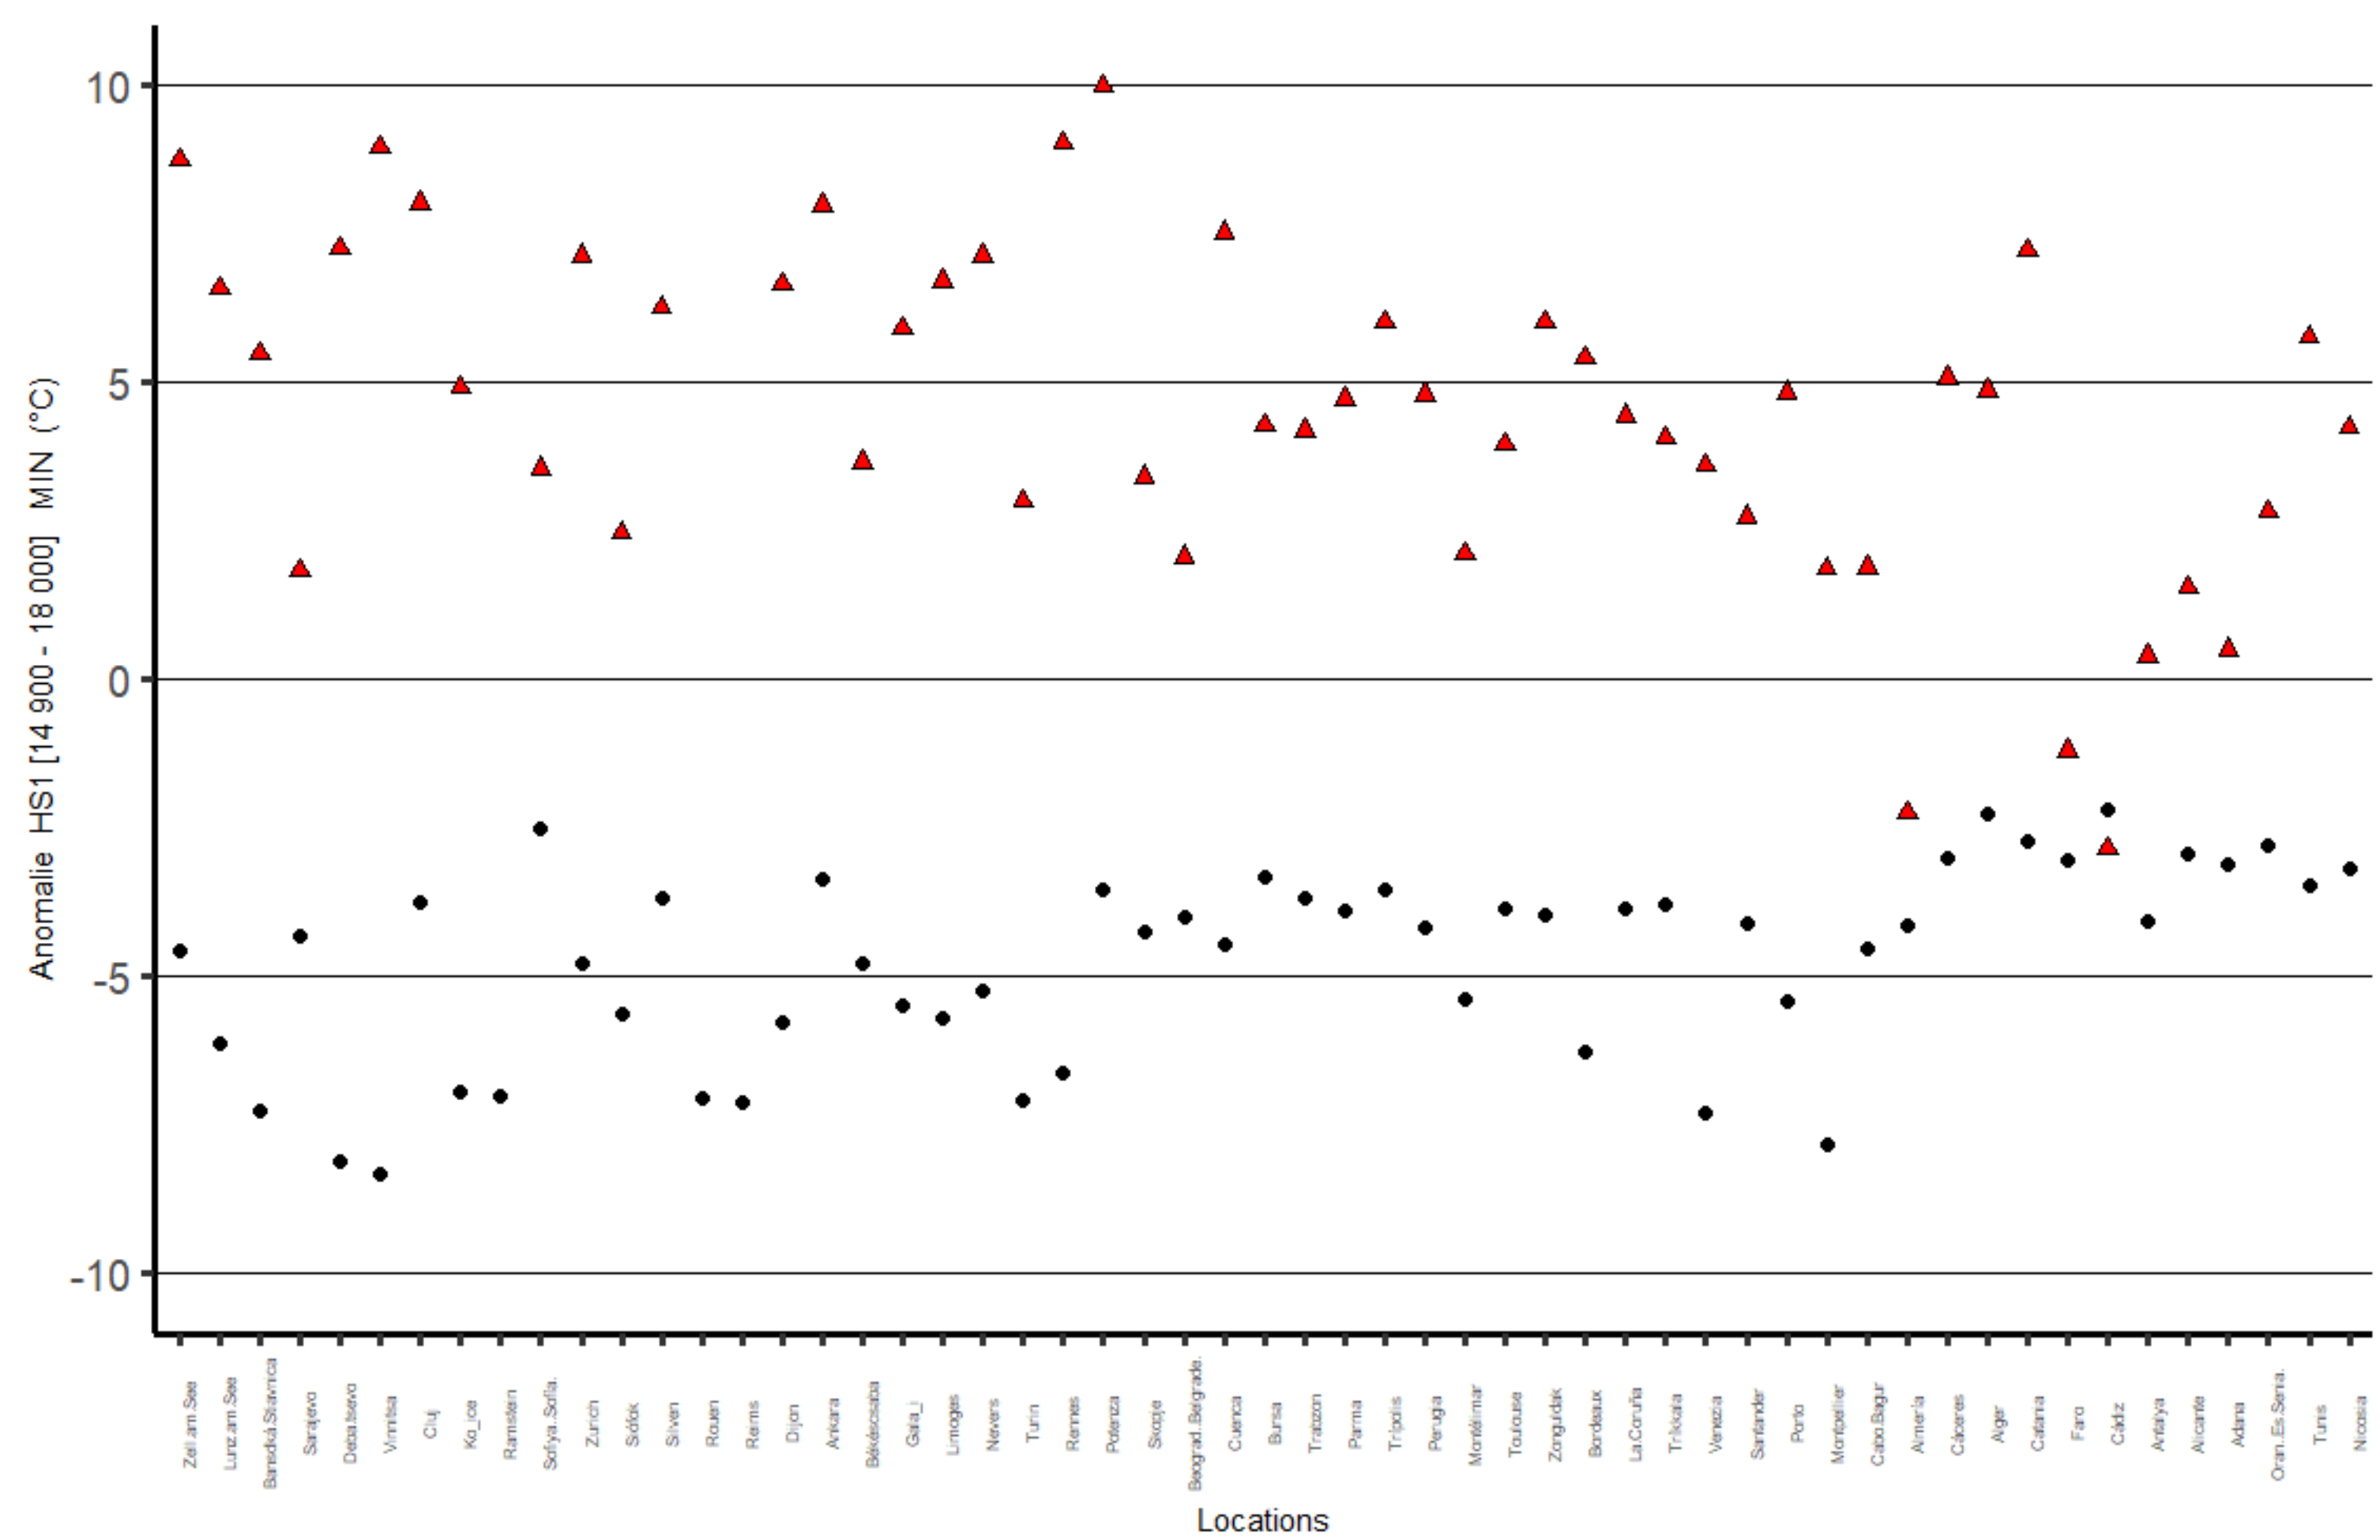

Anomalie Younger-Dryas [11 700 - 12 900] MAT (°C)

10  
5  
0  
-5  
-10

Zell am See  
Lunz am See  
Benedikt-Stavrica  
Sarajevo  
Debatsevo  
Vinnitsa  
Cluj  
Ko\_Ice  
Ramstein  
Sofia\_Sofia  
Zurich  
Sofok  
Sliven  
Rouen  
Remis  
Dijon  
Ankara  
Bekescsaba  
Gala\_J  
Limoges  
Nevers  
Turin  
Rennes  
Pienza  
Skopje  
Beograd\_Begrade  
Cuenca  
Bursa  
Trebzon  
Parna  
Tripolis  
Perugia  
Montelimar  
Toulouse  
Zonguldak  
Bordeaux  
La\_Coruña  
Trikala  
Venezia  
Santander  
Porto  
Montpellier  
Cabo\_Bagur  
Almeria  
Calares  
Alger  
Catania  
Faro  
Cadiz  
Antalya  
Alicante  
Adana  
Oran\_Es\_Senia  
Tunis  
Niessia

Locations

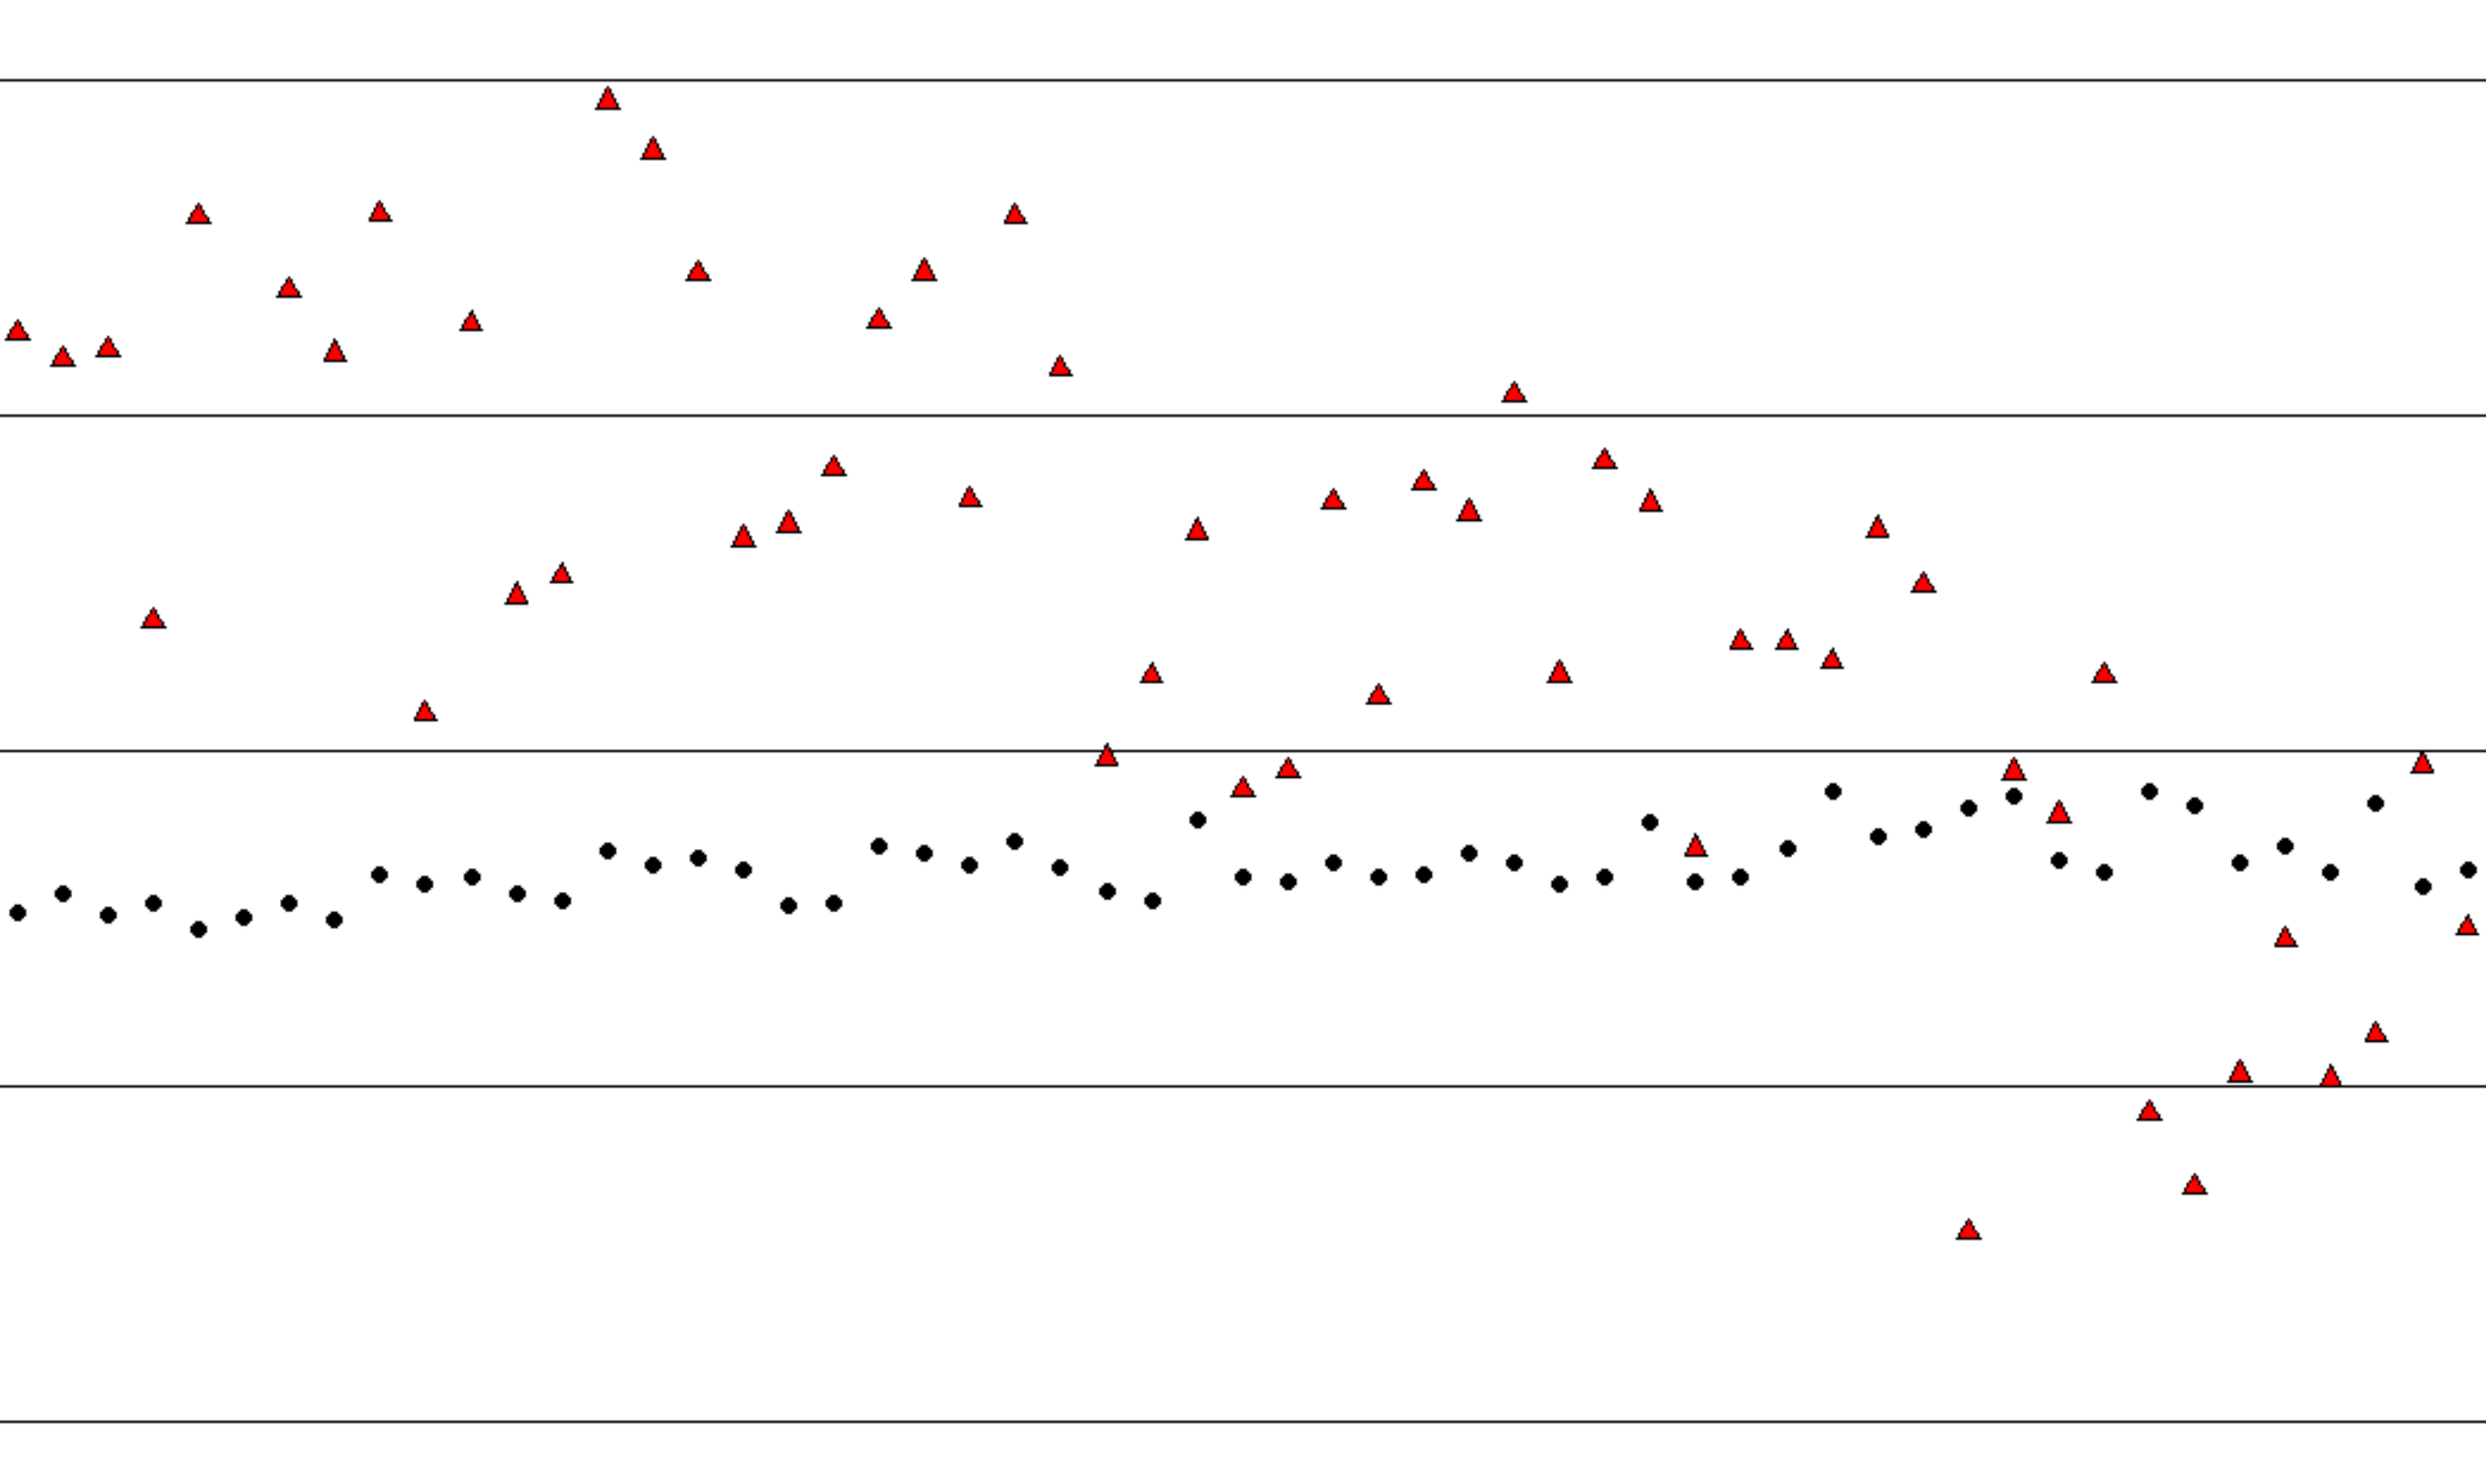

Anomalie Younger-Dryas [11 700 - 12 900] MAX (°C)

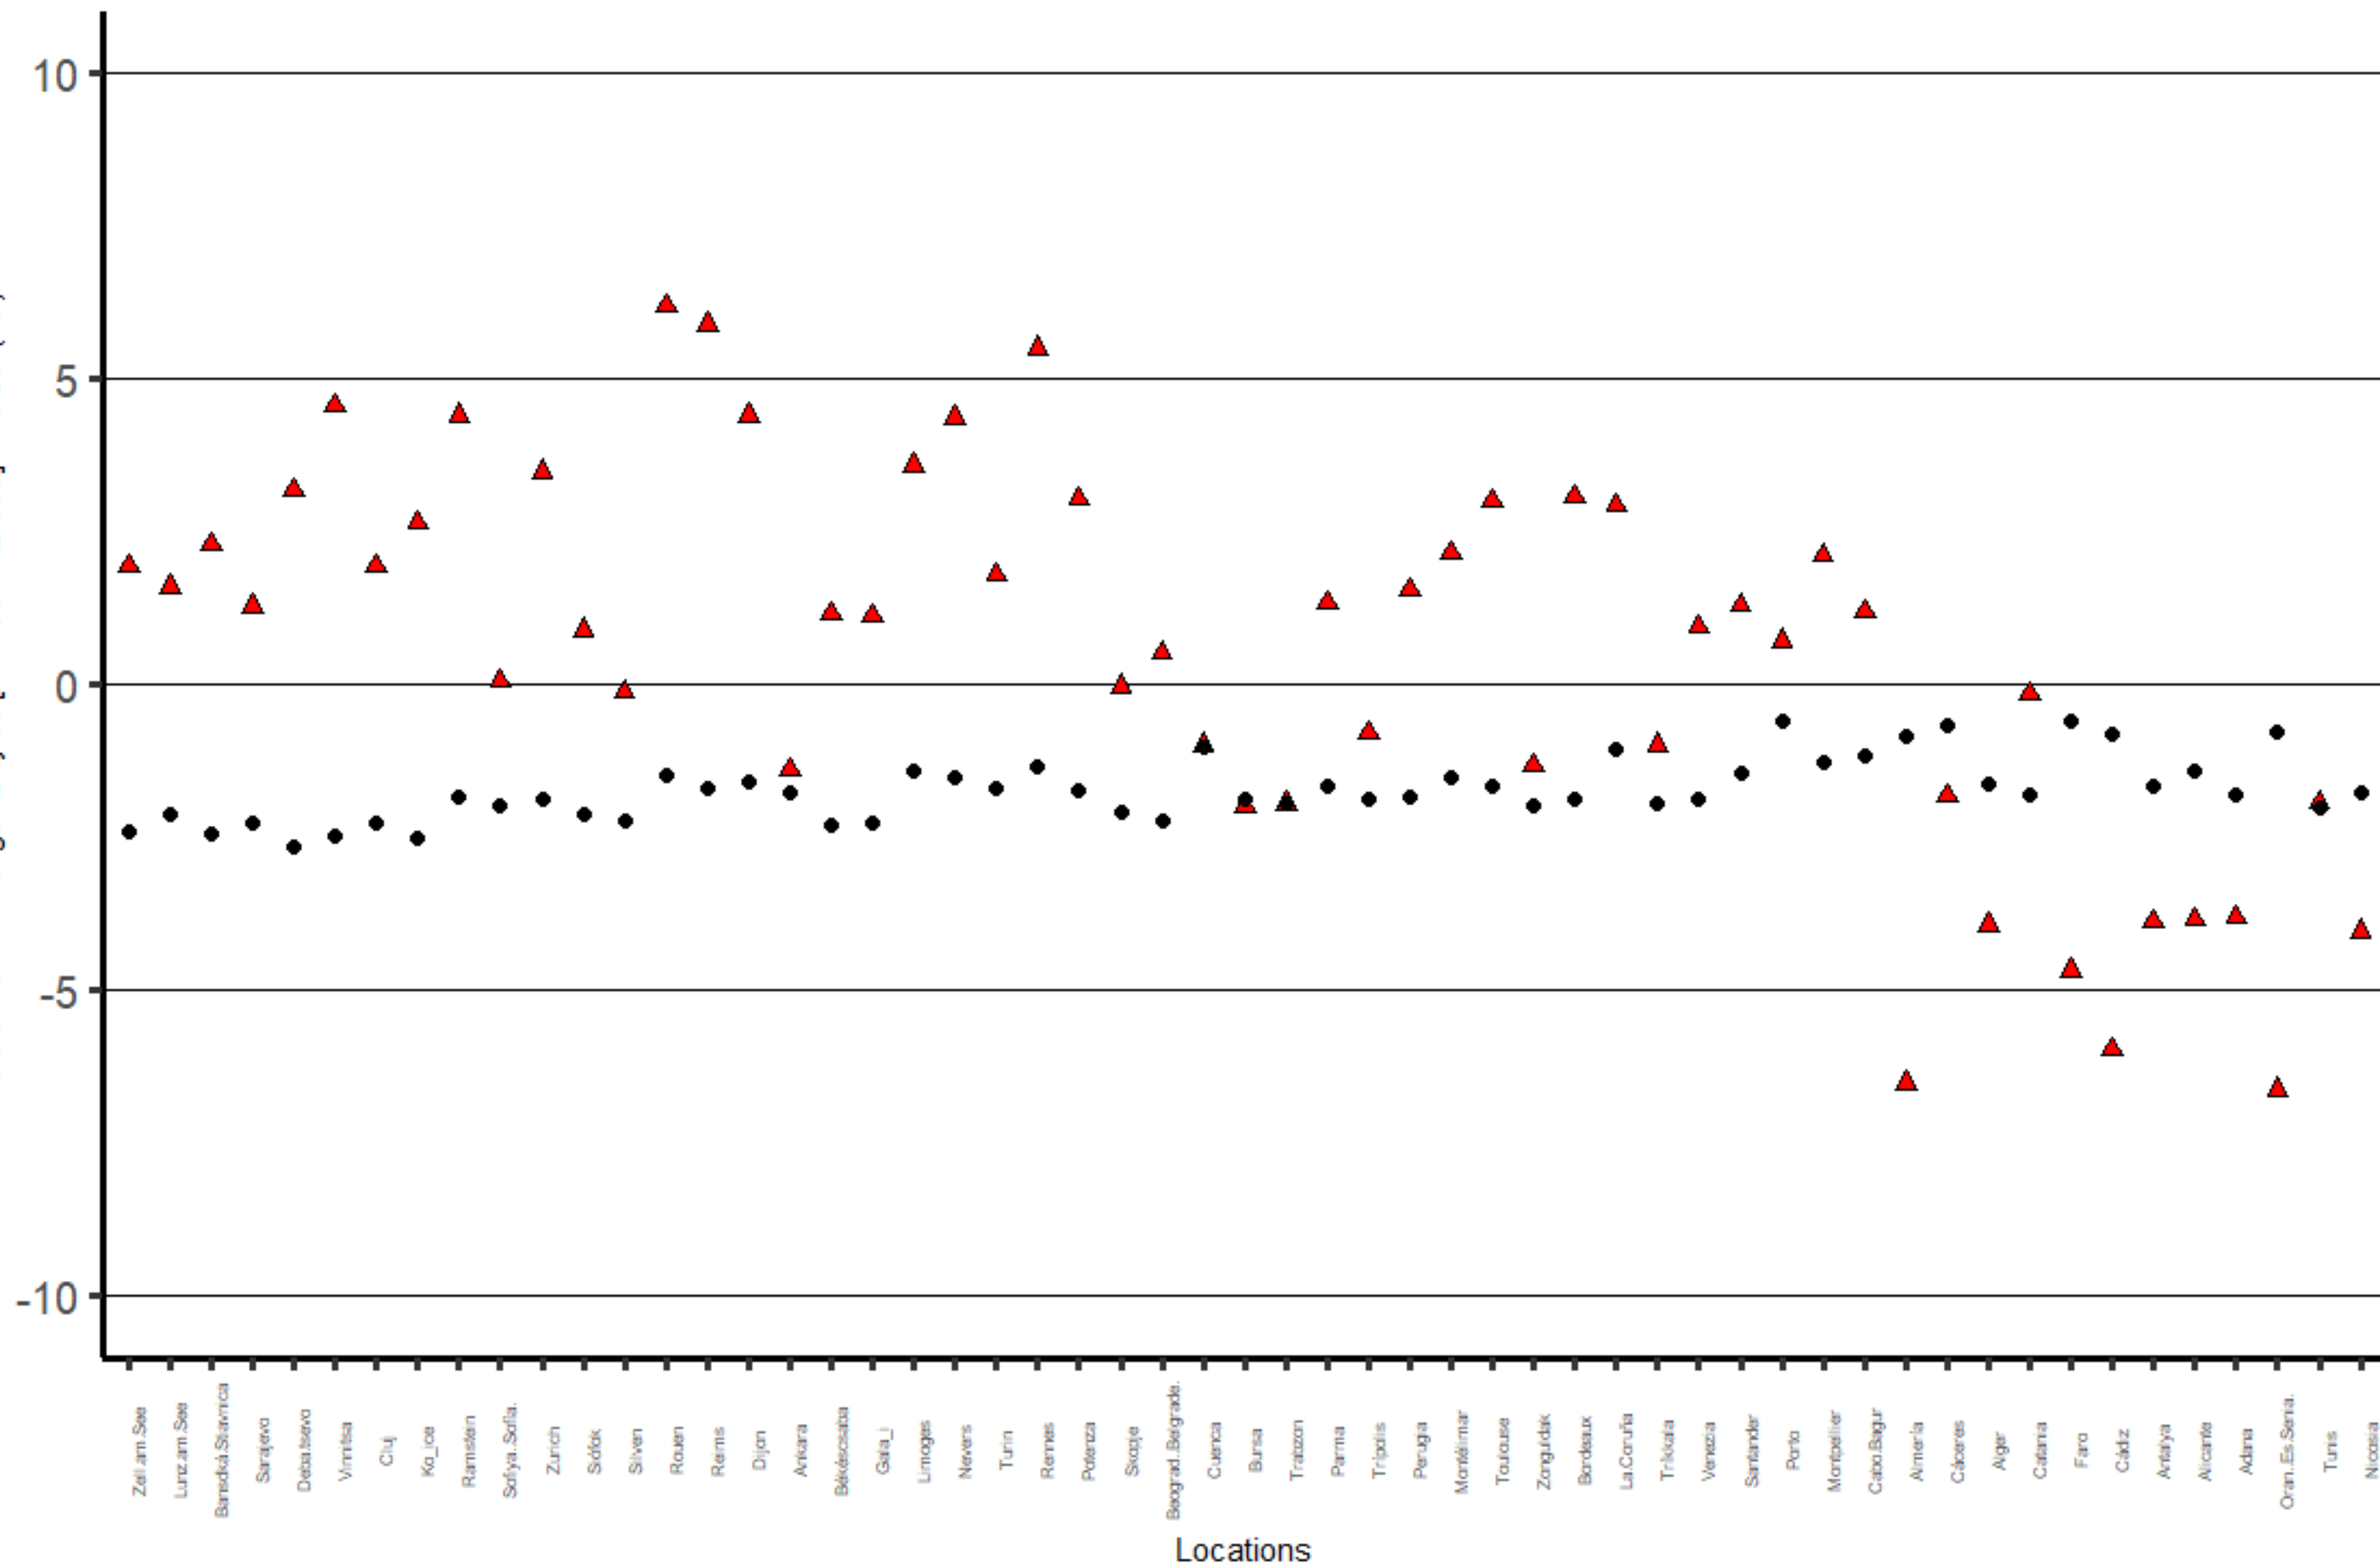

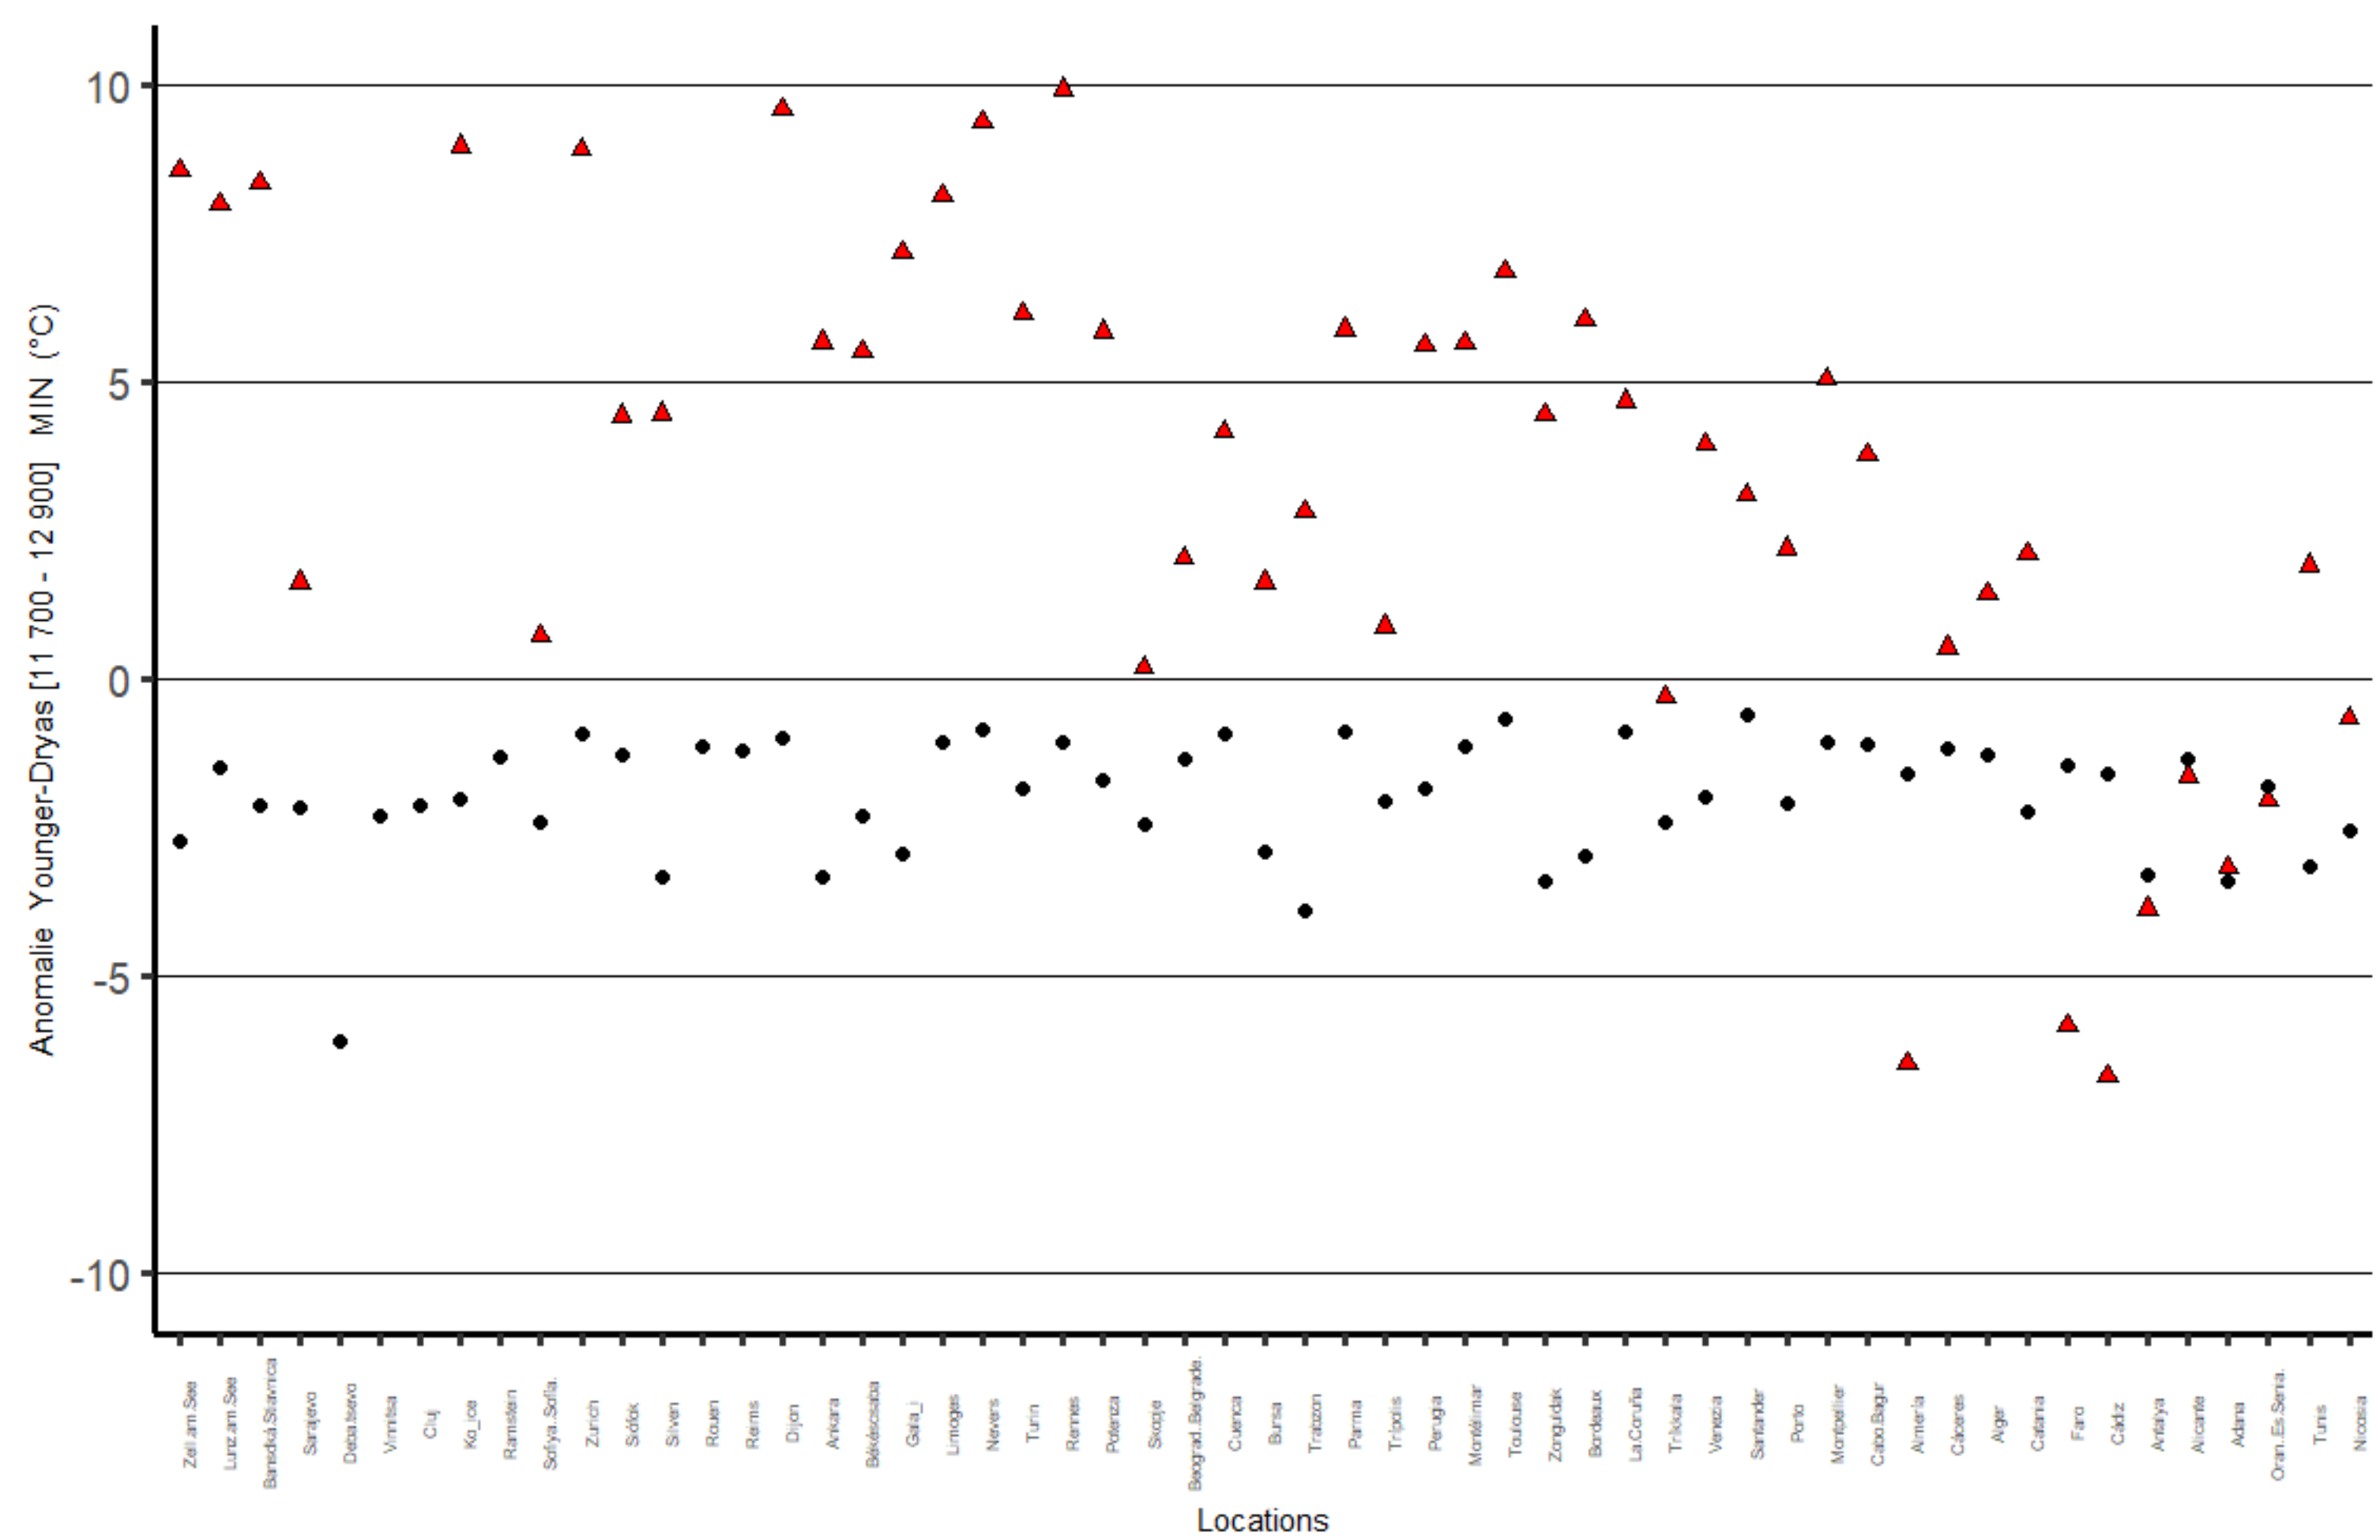

Allerod [12 900 - 13 900] MAT (°C)

15  
10  
5  
0

Zell am See  
Lunz am See  
Benedikt-Stammica  
Sarajevo  
Debatsevo  
Vinnitsa  
Cluj  
Ko\_ice  
Ramstein  
Sofya.Sofia.  
Zurich  
Sidok  
Sliven  
Rouen  
Remis  
Dijon  
Ankara  
Bekescsaba  
Gala\_J  
Limoges  
Nevers  
Turin  
Rennes  
Potenza  
Skopje  
Beograd.Belgrade.  
Cuenca  
Bursa  
Trabzon  
Pamla  
Tripolis  
Perugia  
Montelimar  
Toulouse  
Zonguldak  
Bordeaux  
La\_Coruña  
Trikala  
Venezia  
Santander  
Porto  
Montpellier  
Cabo.Bagur  
Almeria  
Caceres  
Alger  
Catania  
Faro  
Cadiz  
Antalya  
Alicante  
Adana  
Oran.Es.Senia.  
Tunis  
Nicosia

Locations

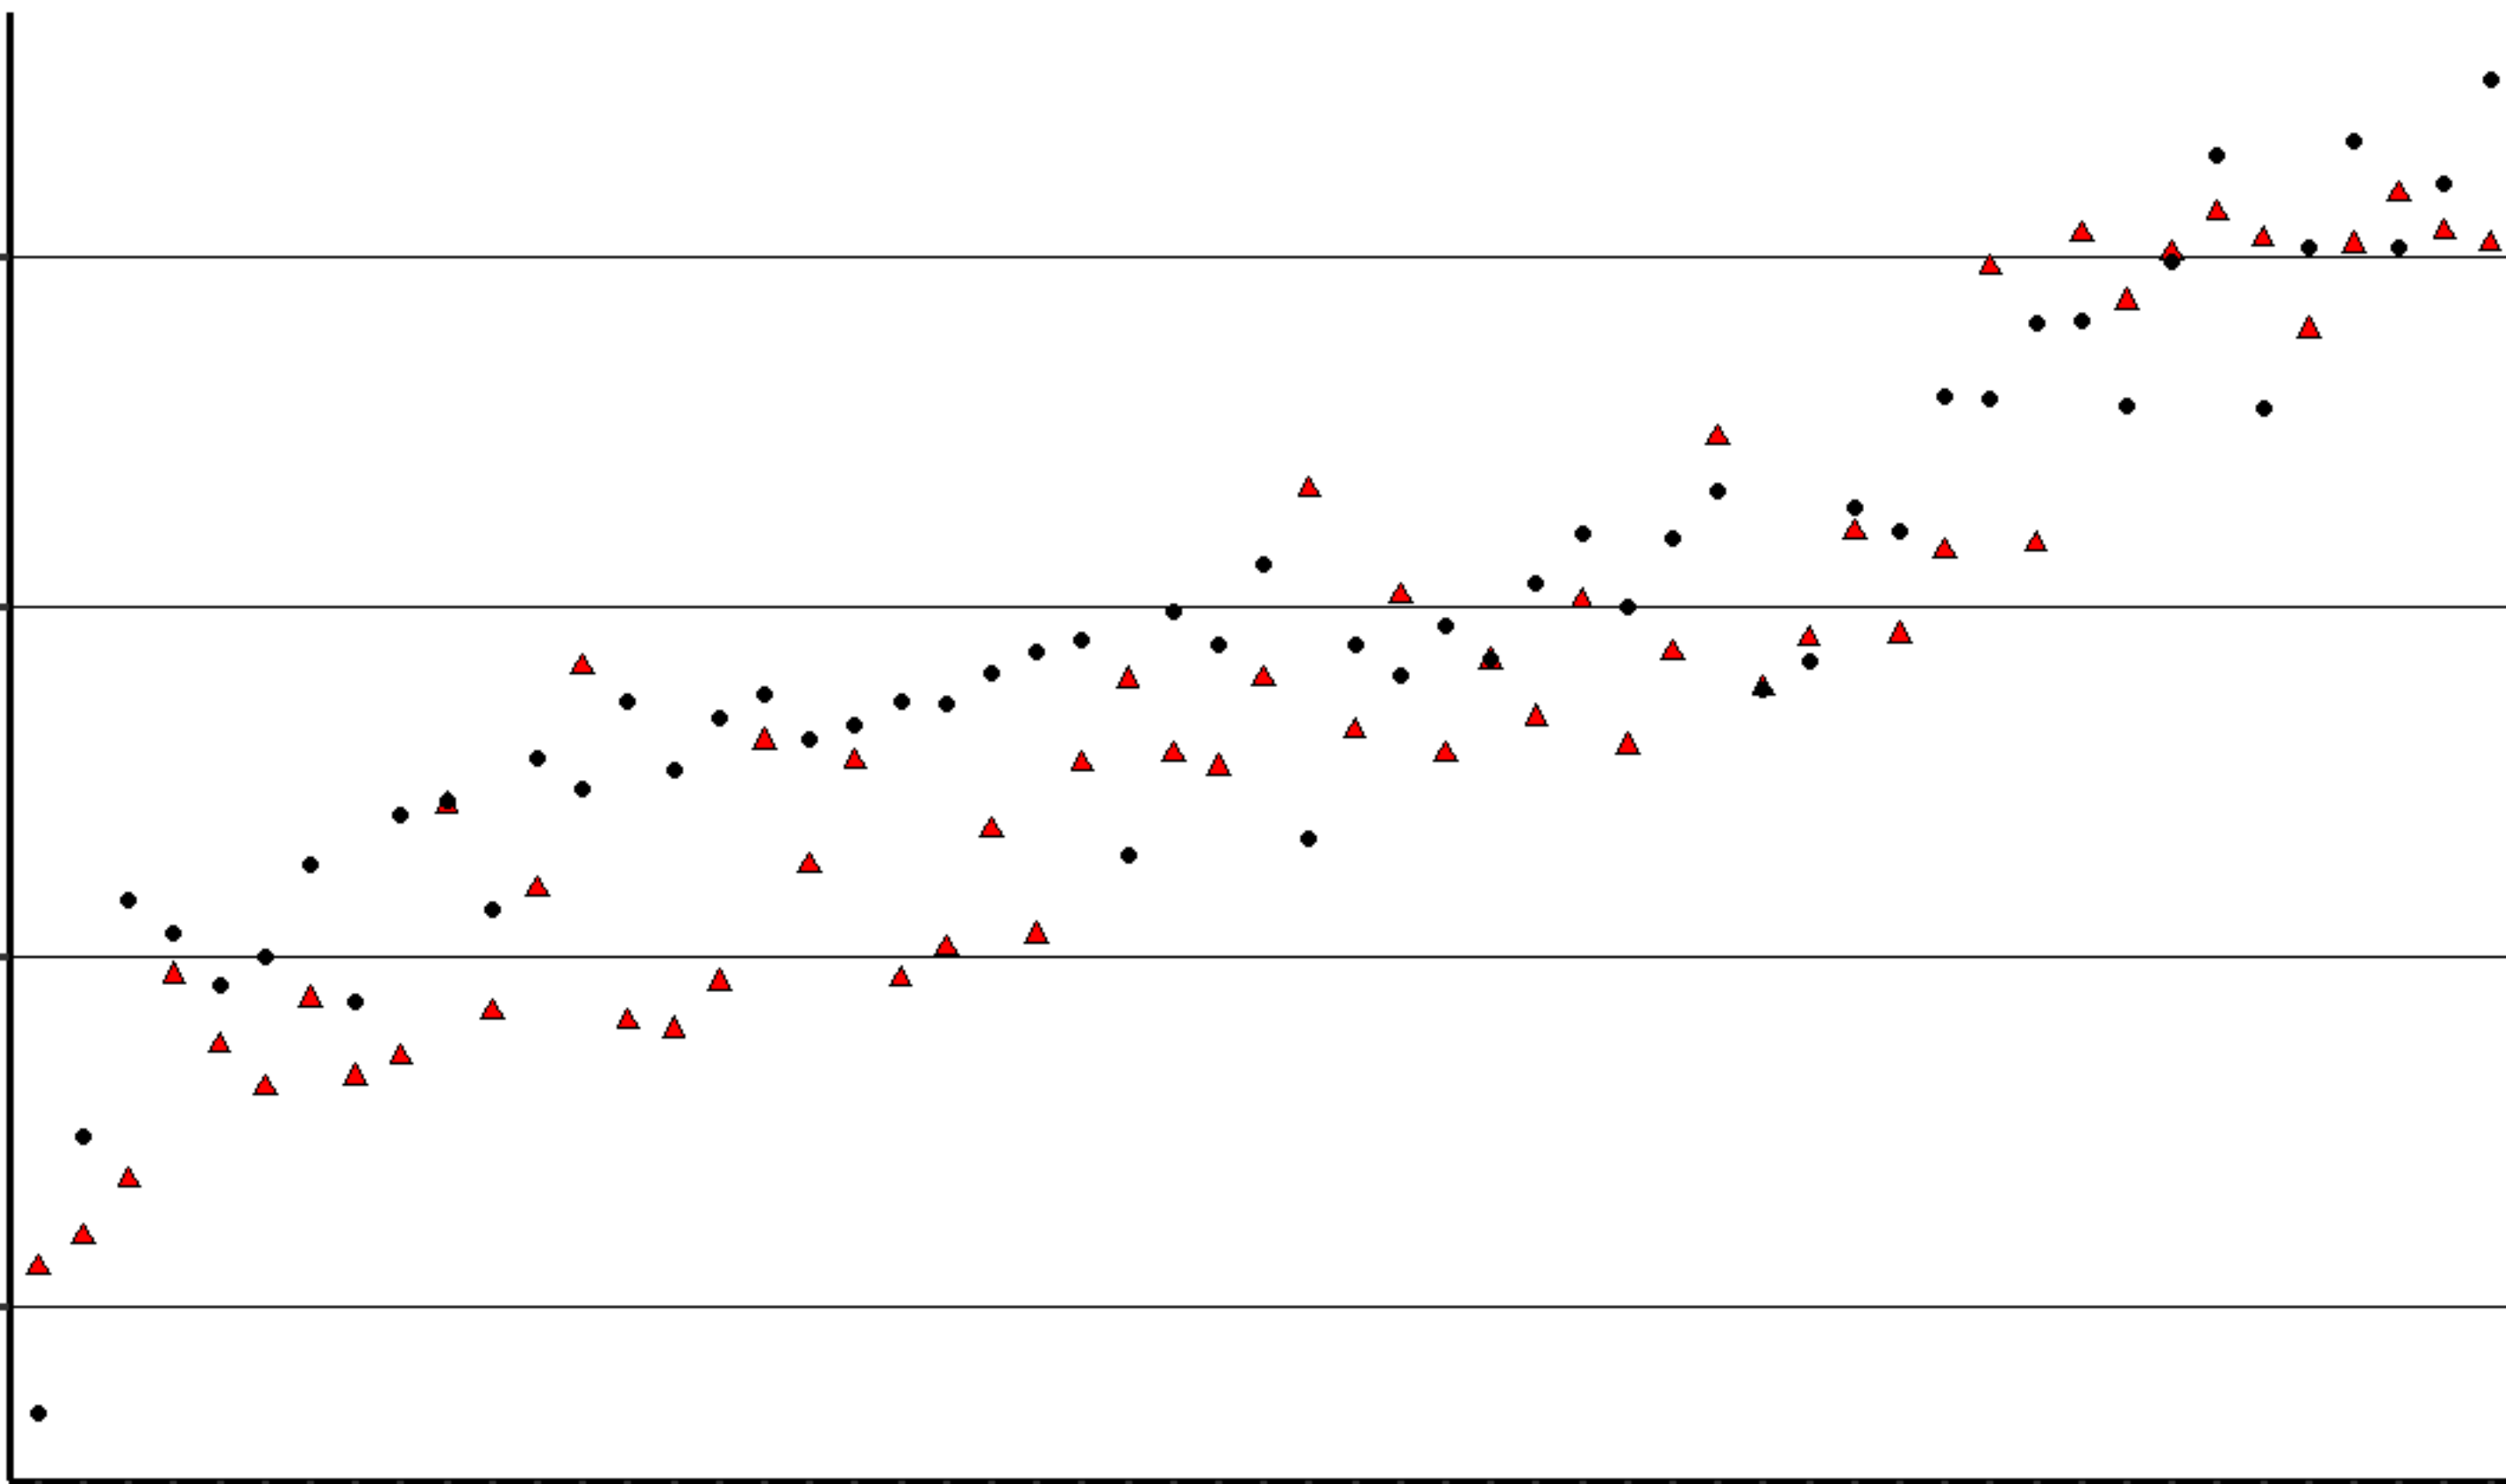

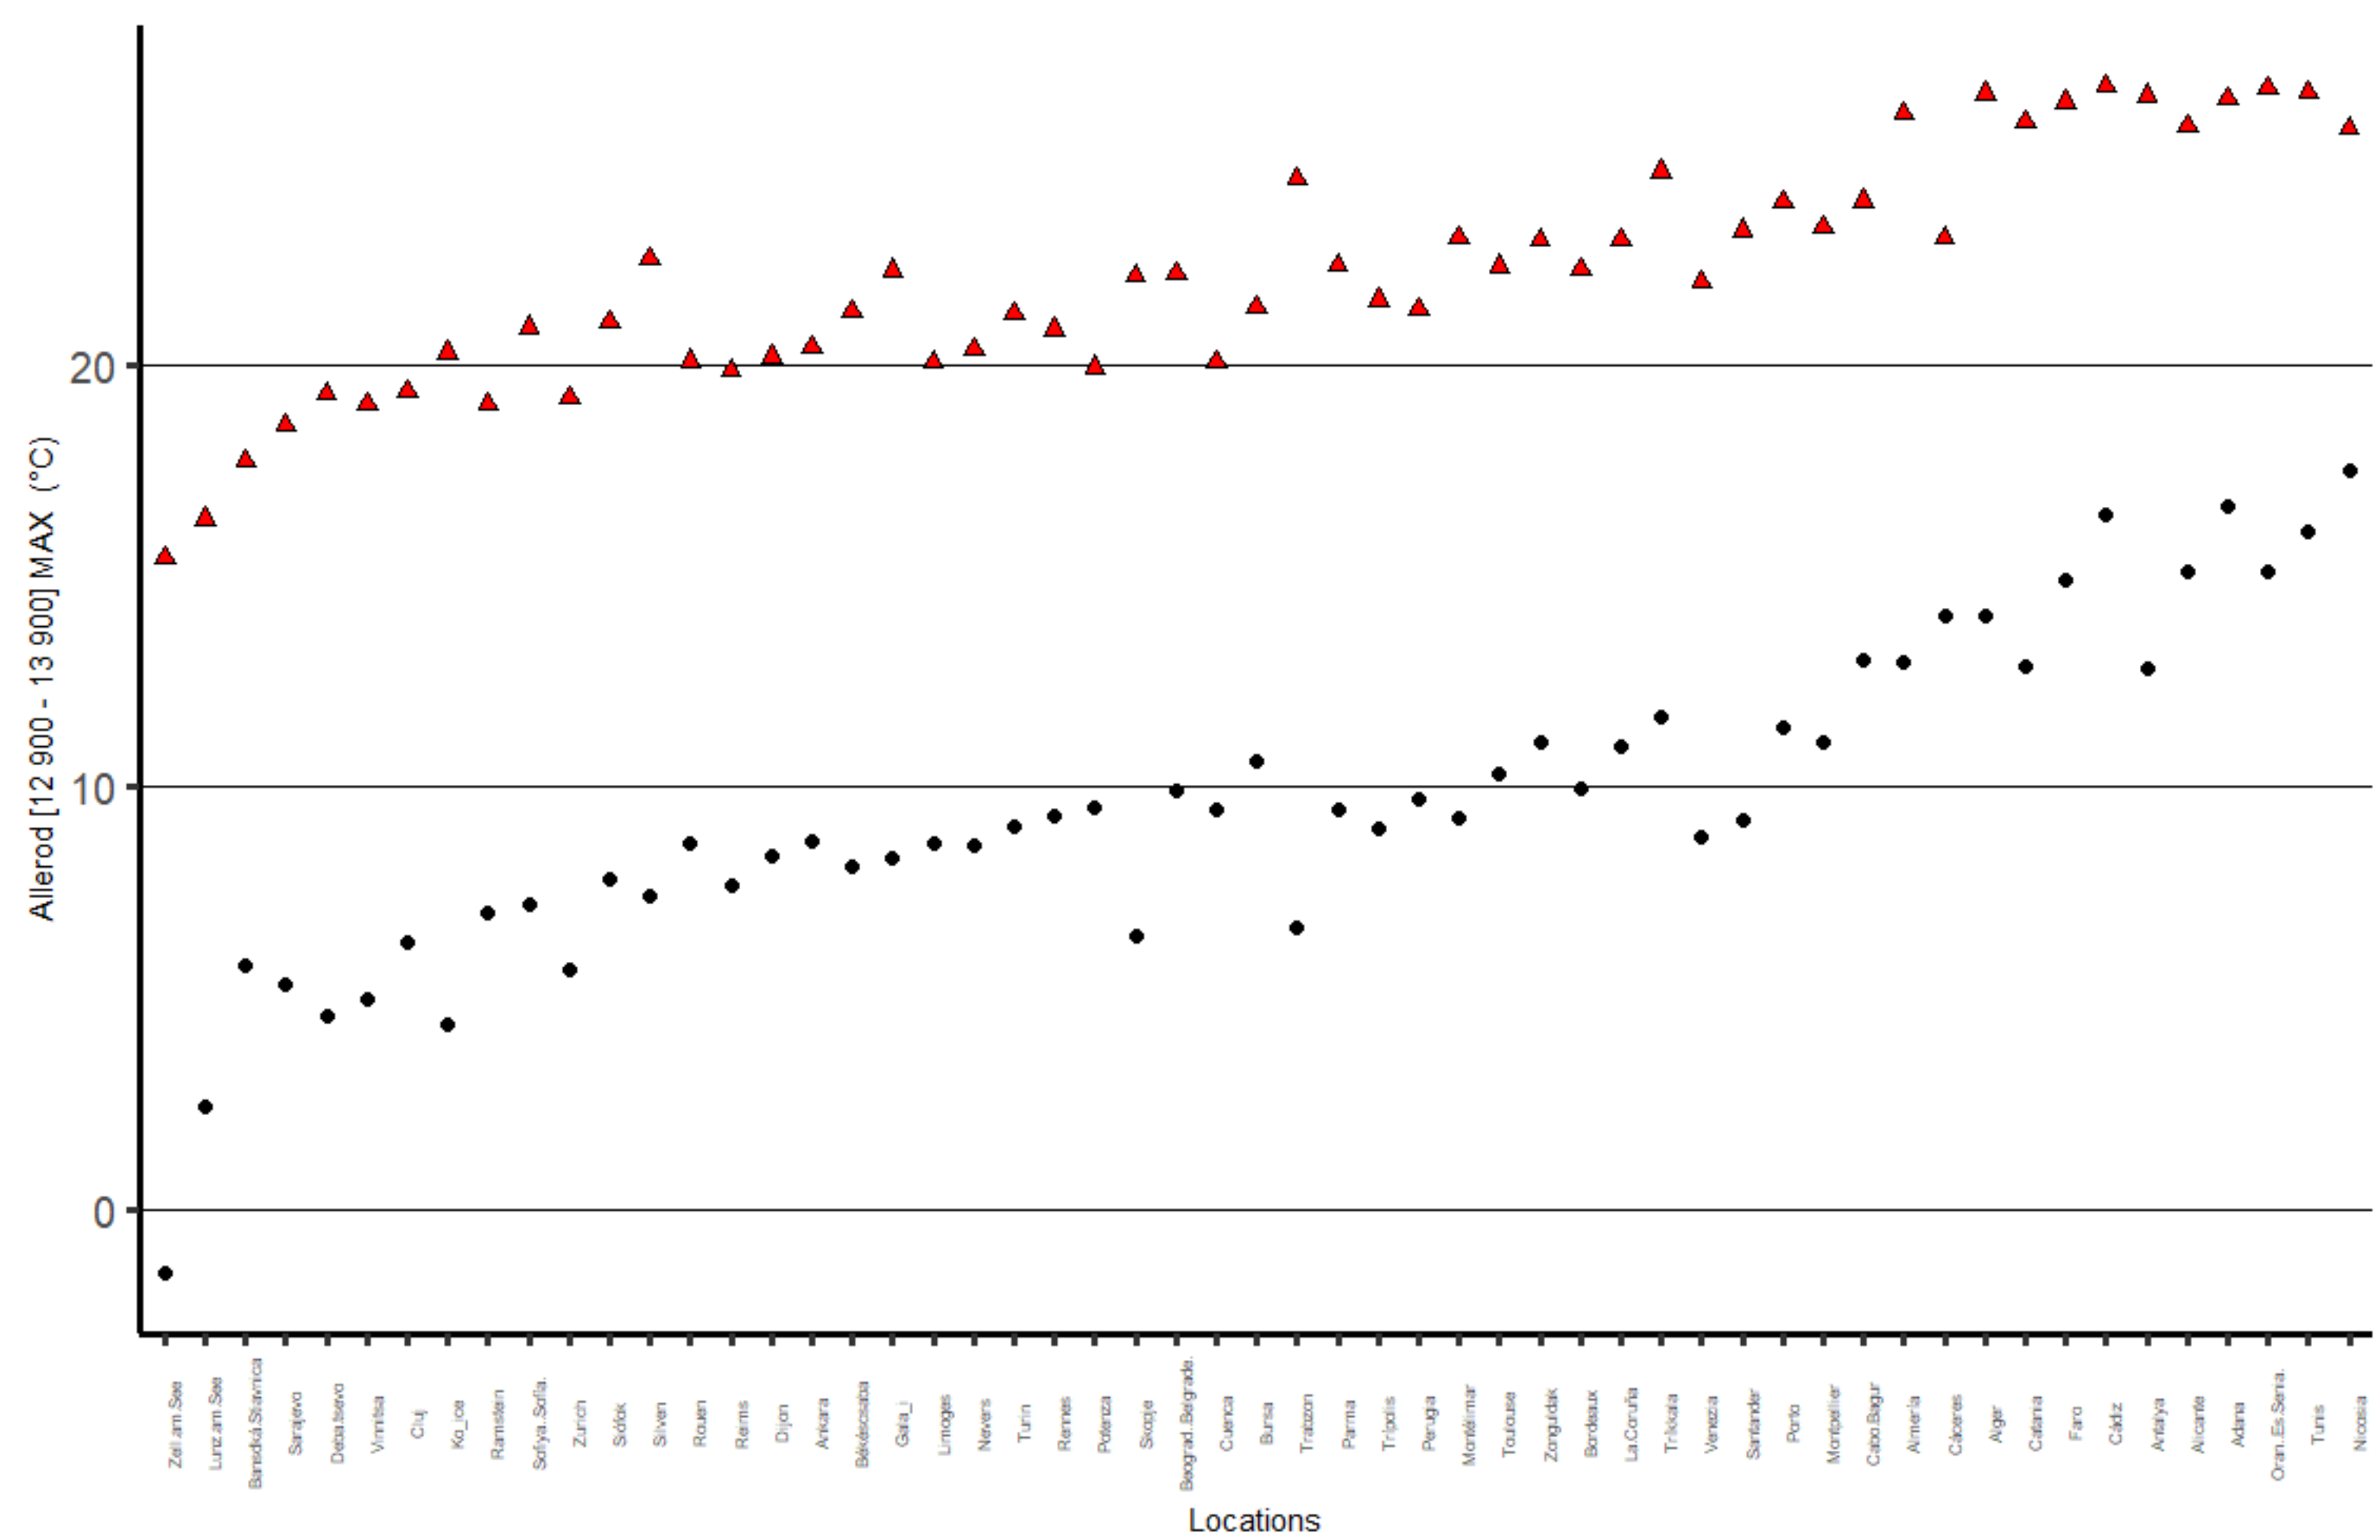

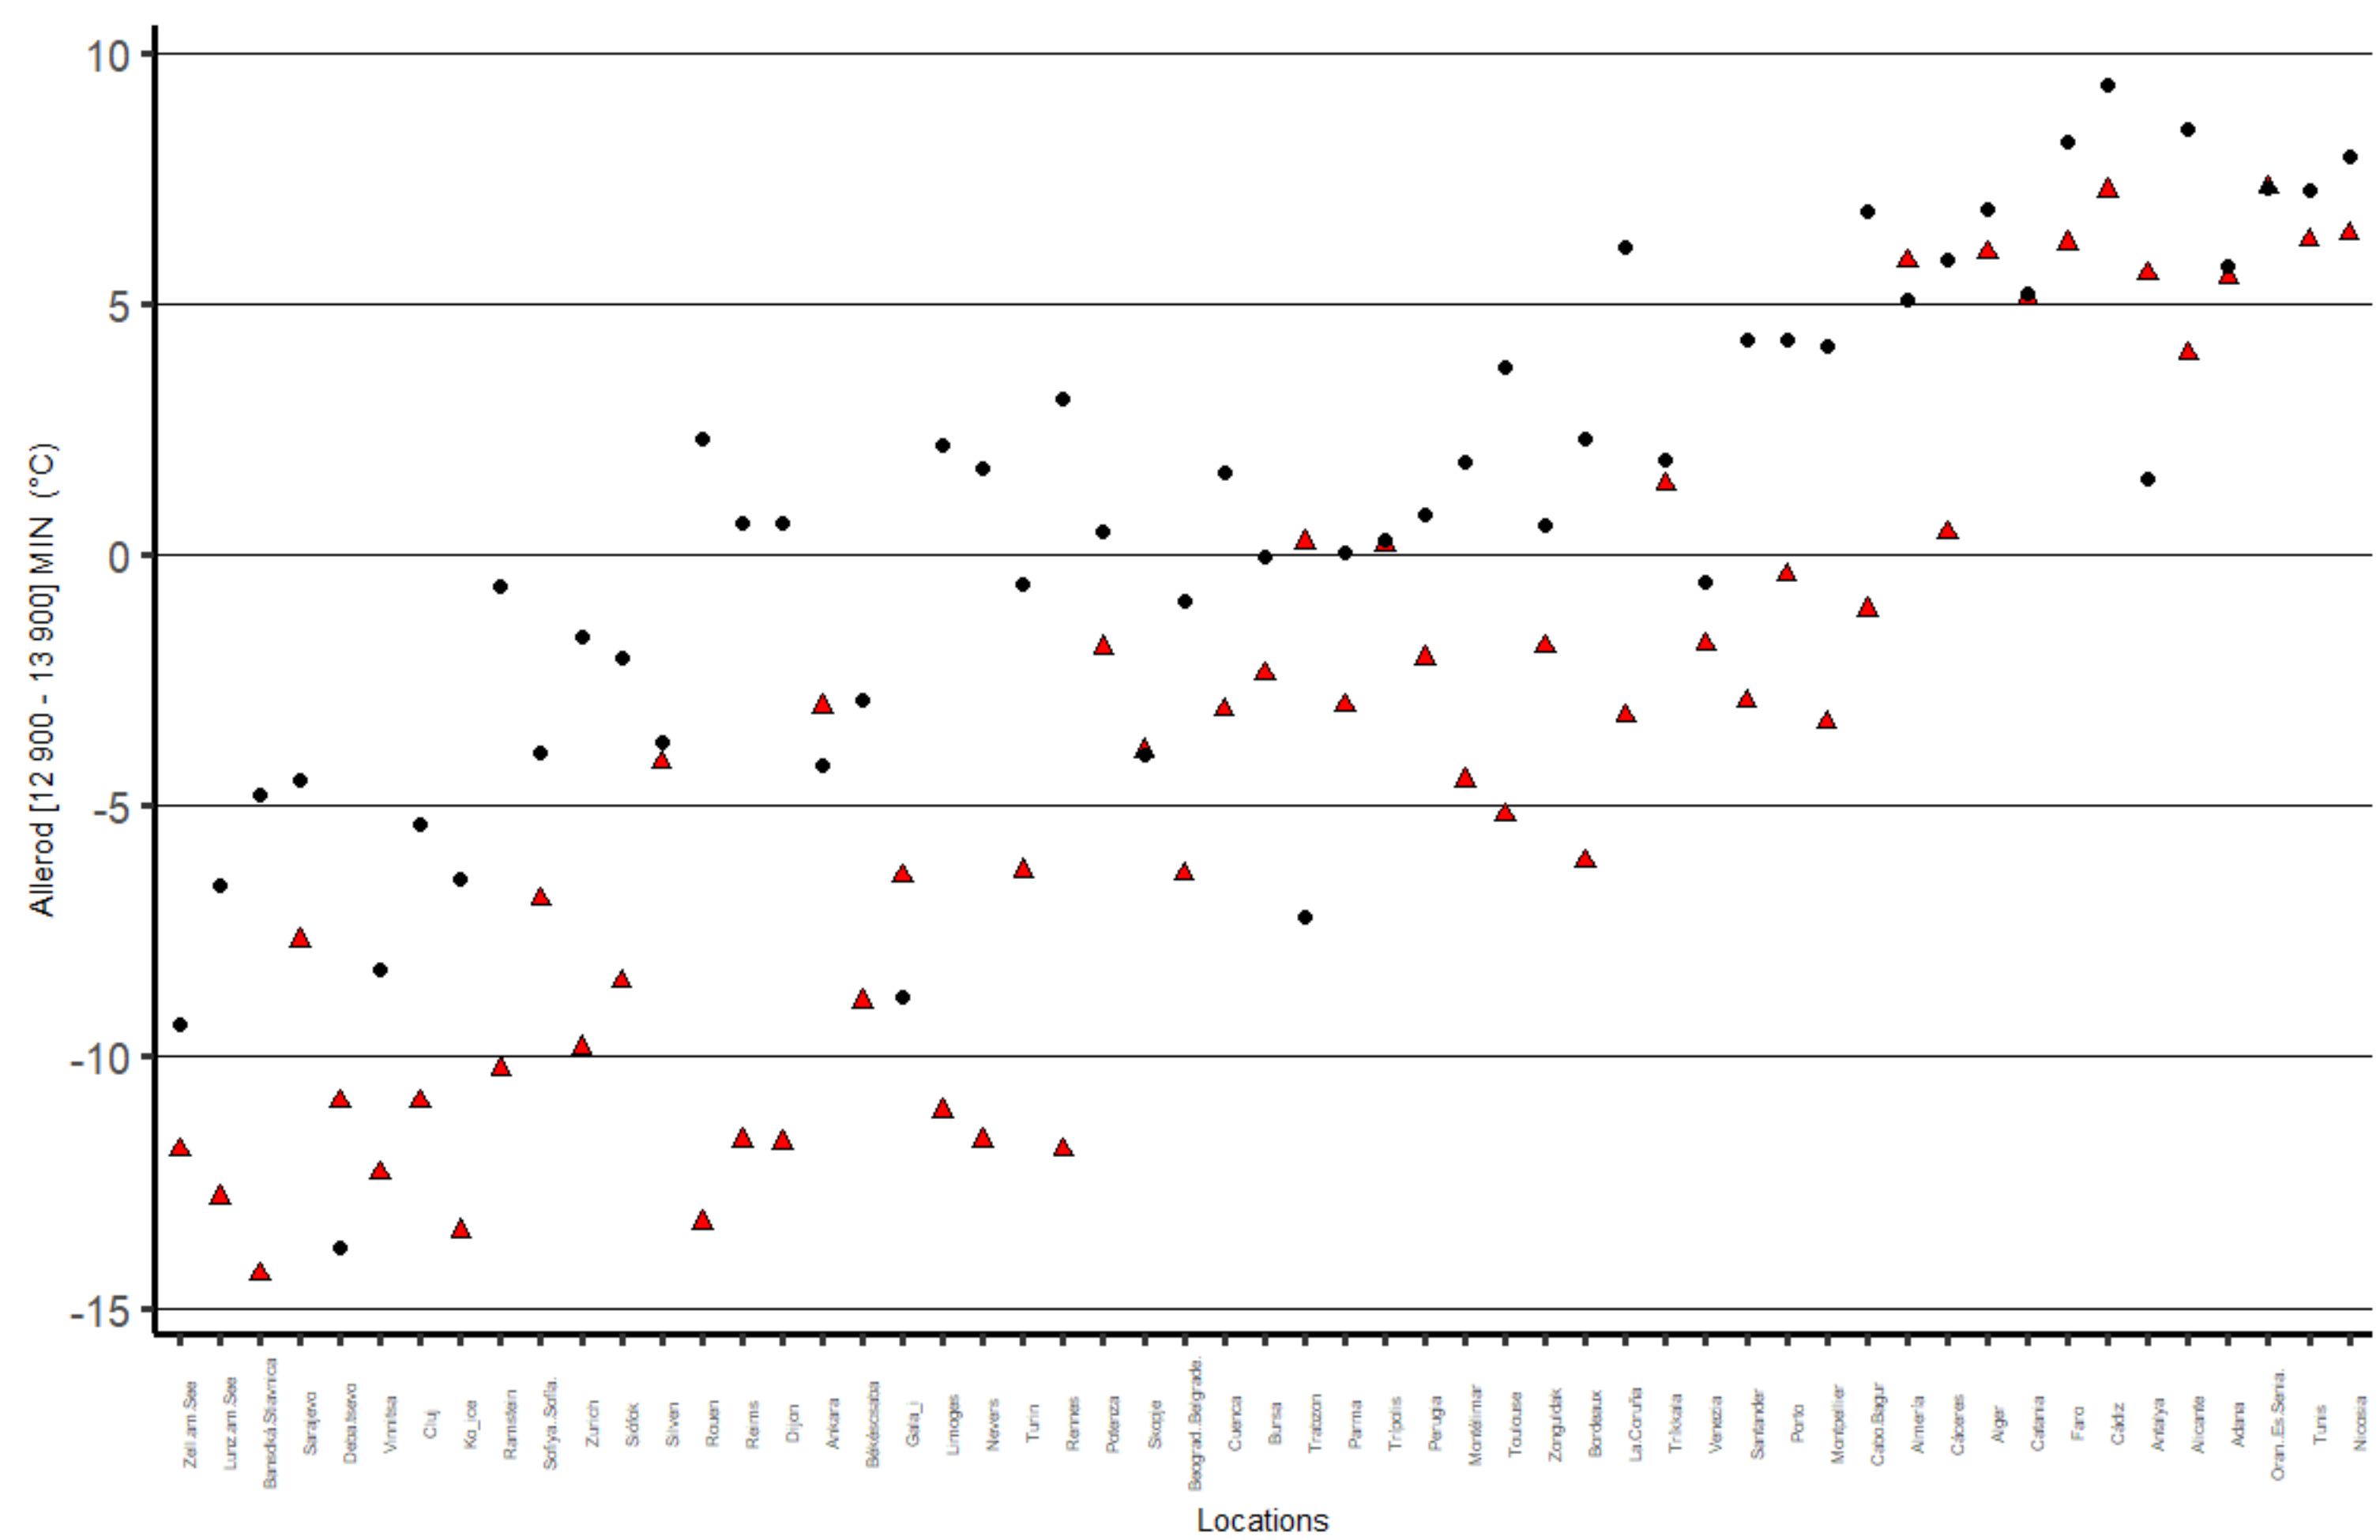

Bolling [13 900 - 14 900] MAT (°C)

15

10

5

0

Zell am See  
Lunz am See  
Benedikt-Stammica  
Sarajevo  
Debatsevo  
Vinnitsa  
Cluj  
Ko\_ice  
Ramstein  
Sofiya.Sofia.  
Zurich  
Sidok  
Sliven  
Rouen  
Remis  
Dijon  
Ankara  
Békéscsaba  
Gala\_J  
Limoges  
Nevers  
Turin  
Rennes  
Potenza  
Skopje  
Beograd.Belgrade.  
Cuenca  
Bursa  
Trabzon  
Pamir  
Tripolis  
Perugia  
Montélimar  
Toulouse  
Zonguldak  
Bordeaux  
La\_Coruña  
Trilcala  
Venezia  
Santander  
Porto  
Montpellier  
Cabo.Bagur  
Almeria  
Caceres  
Alger  
Catania  
Faro  
Cádiz  
Antalya  
Alicante  
Adana  
Oran.Es.Senia.  
Tunis  
Niessia

Locations

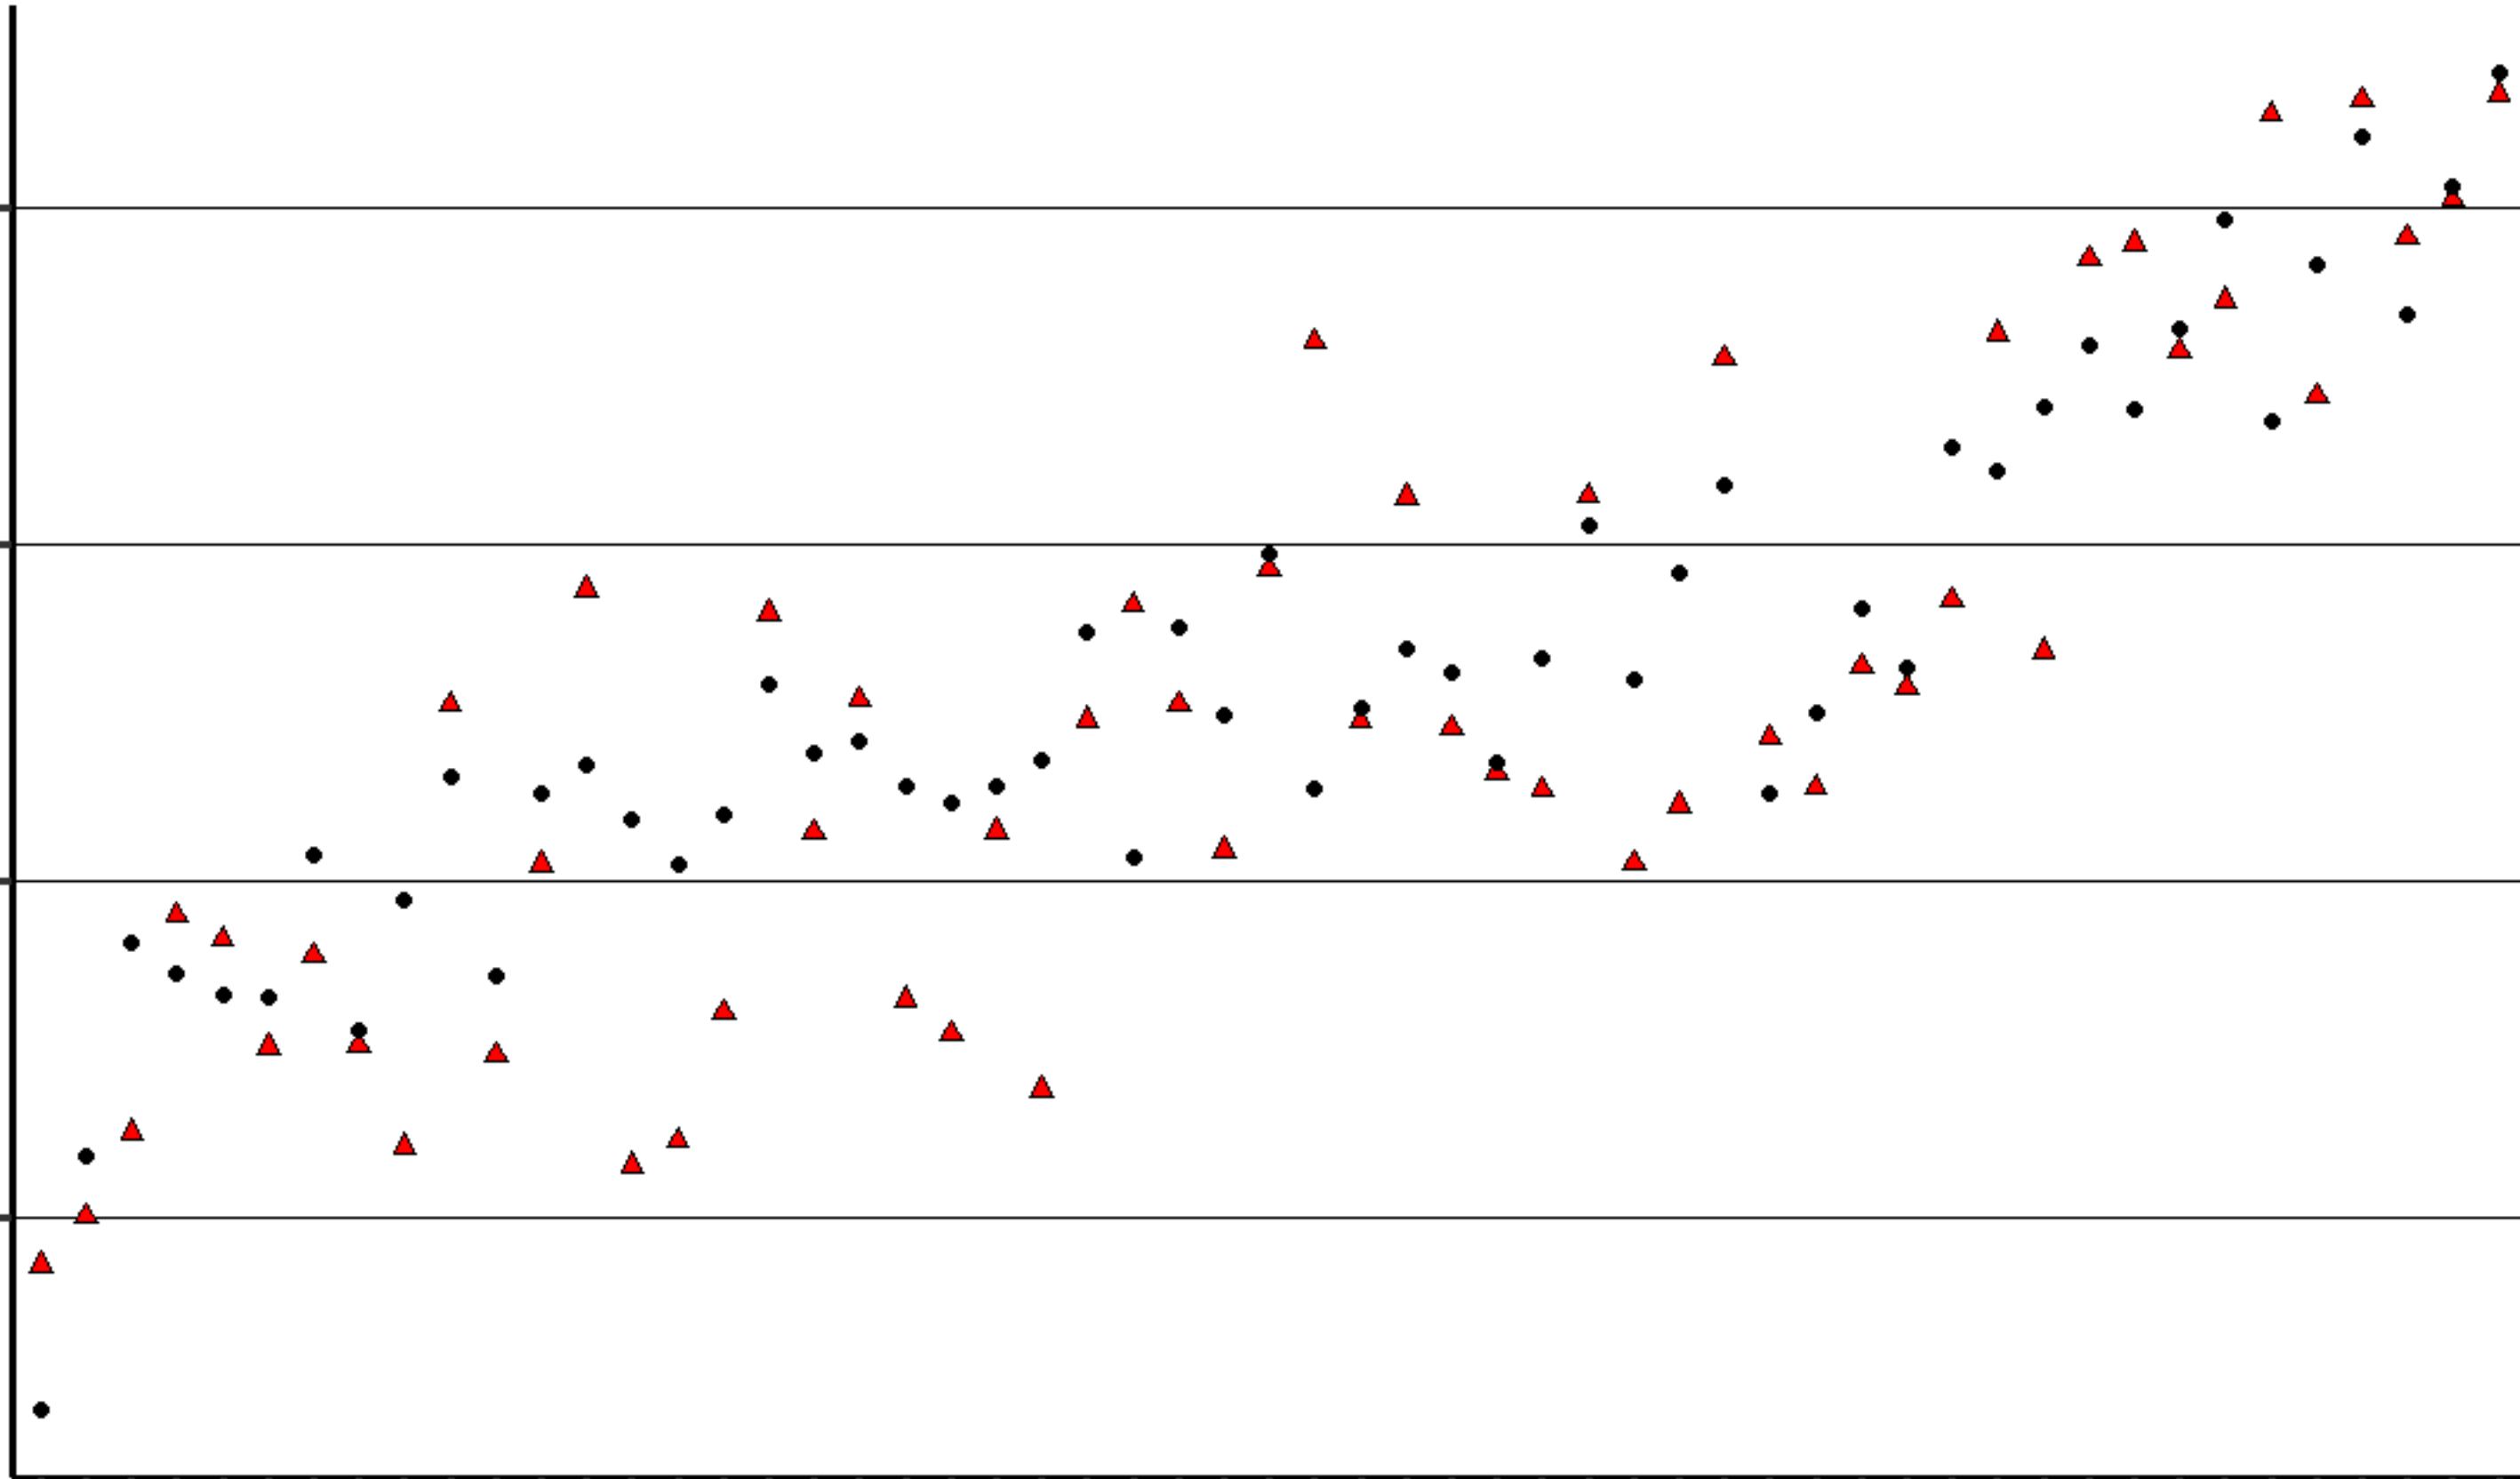



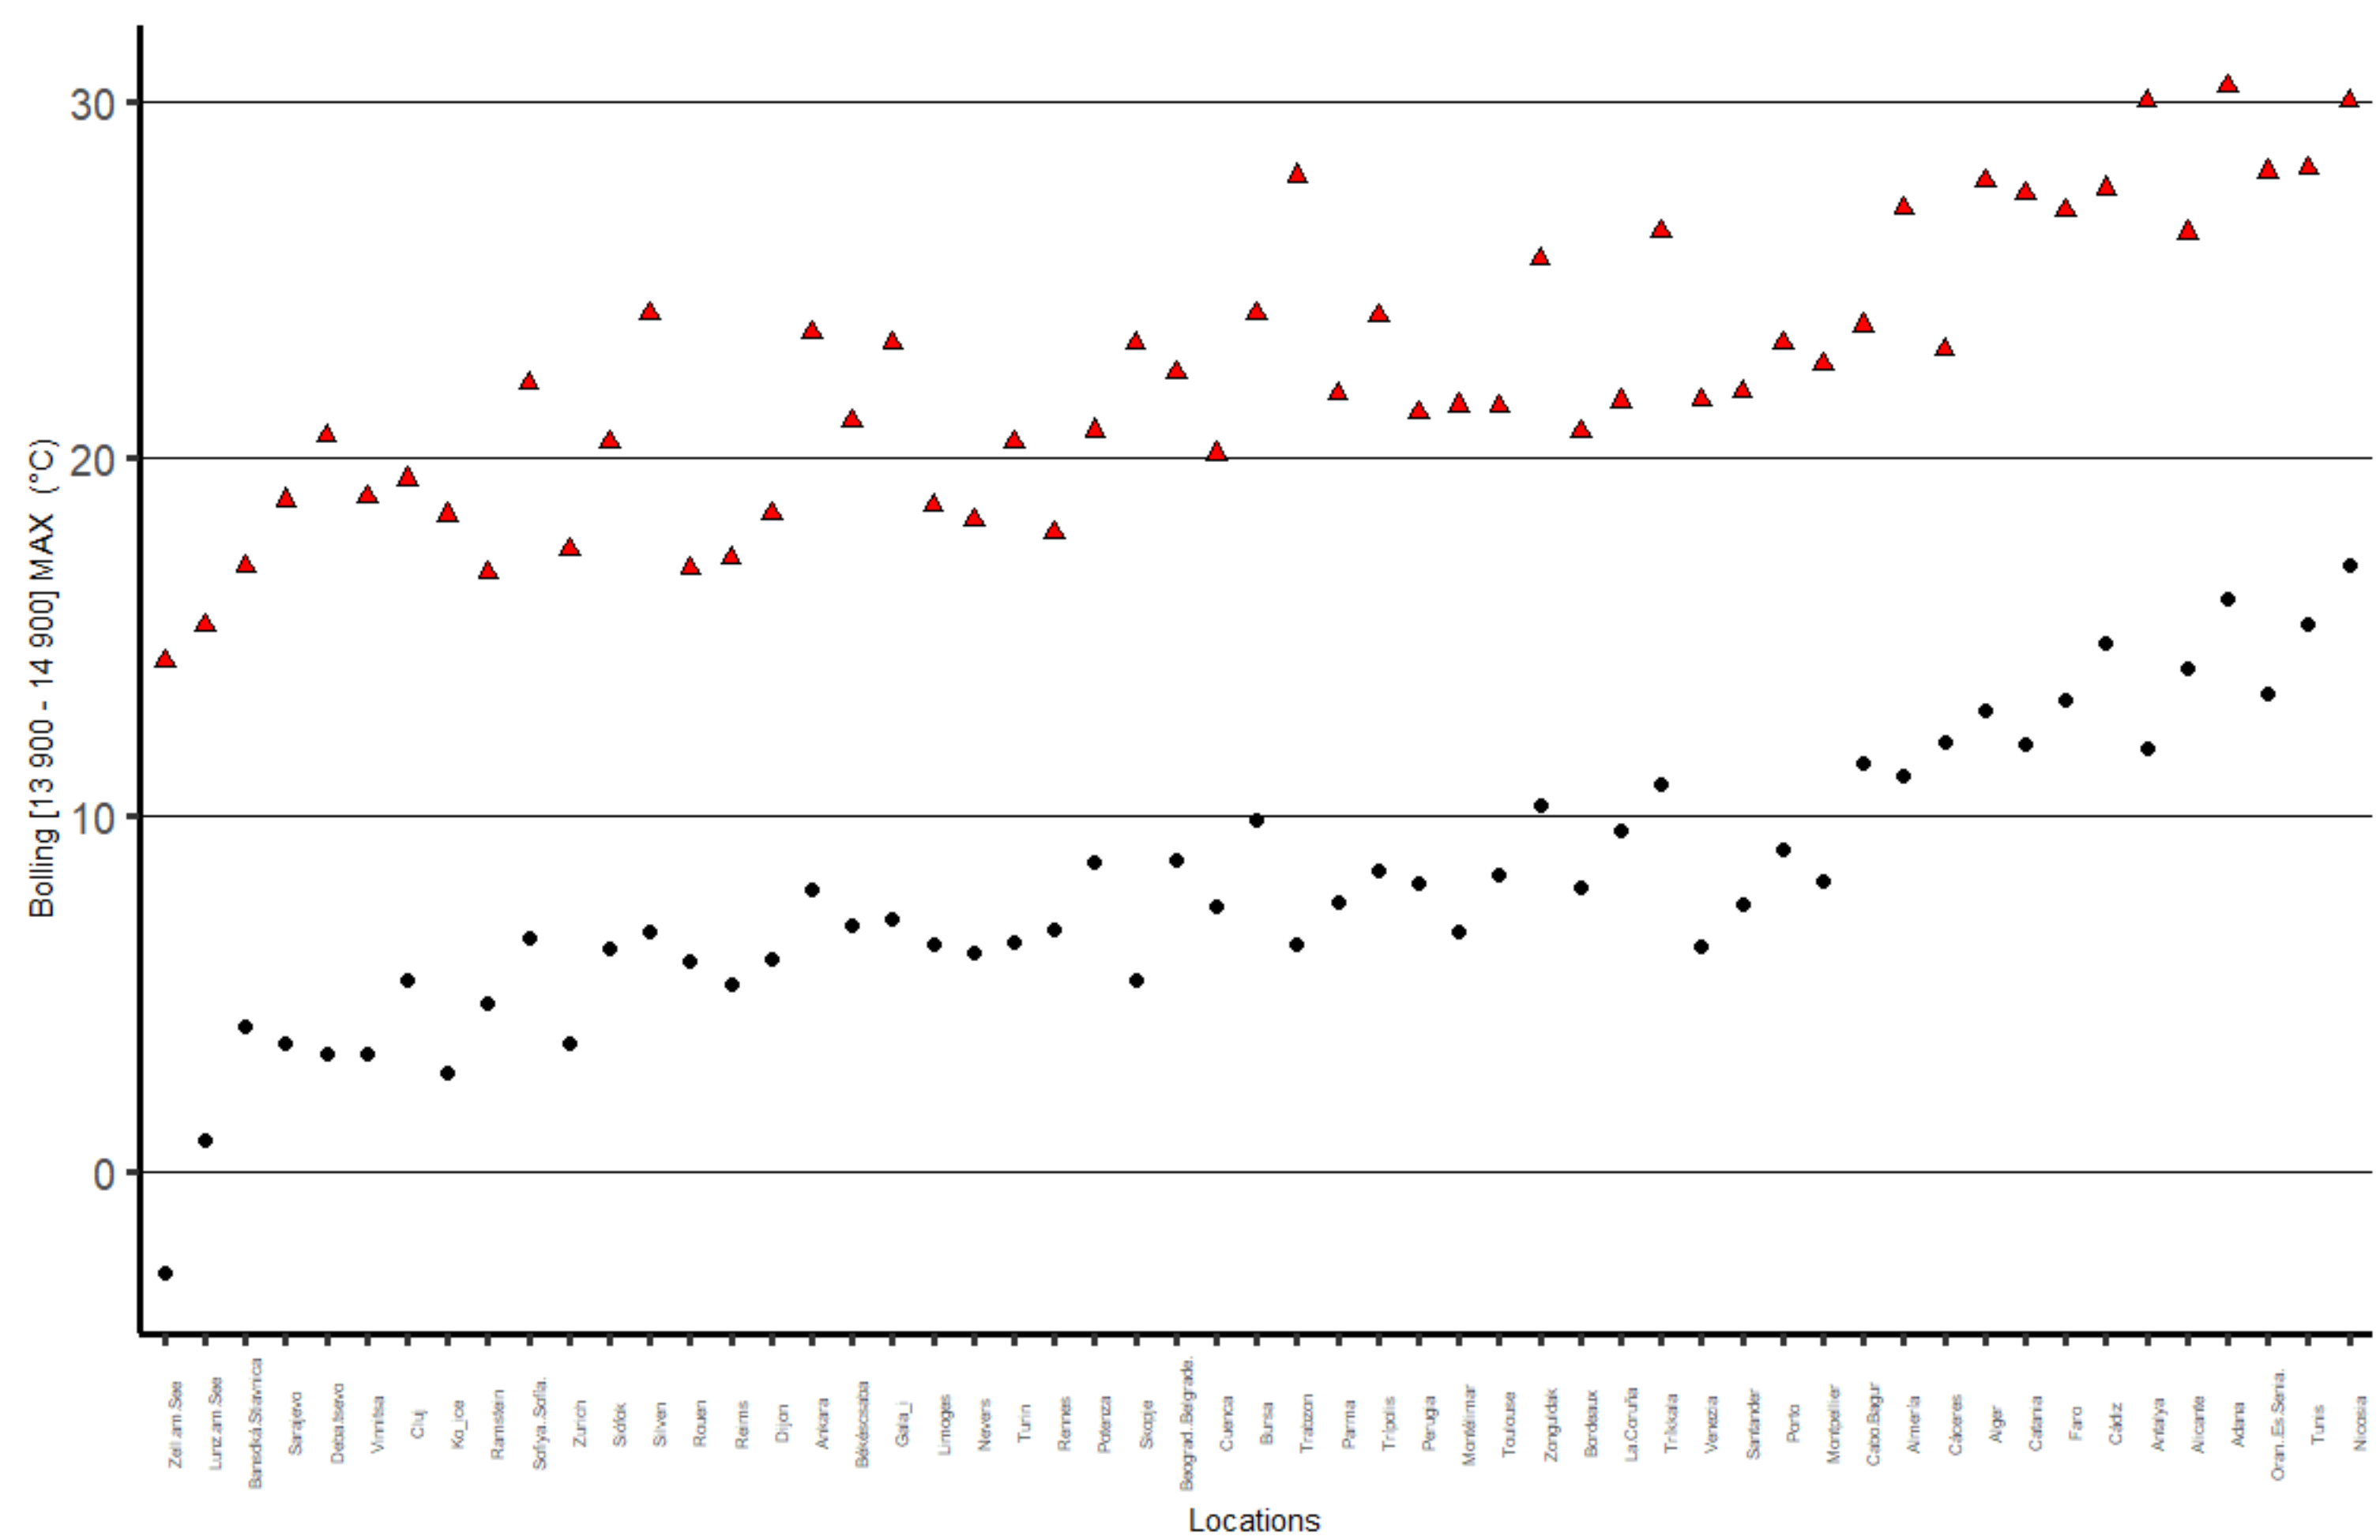

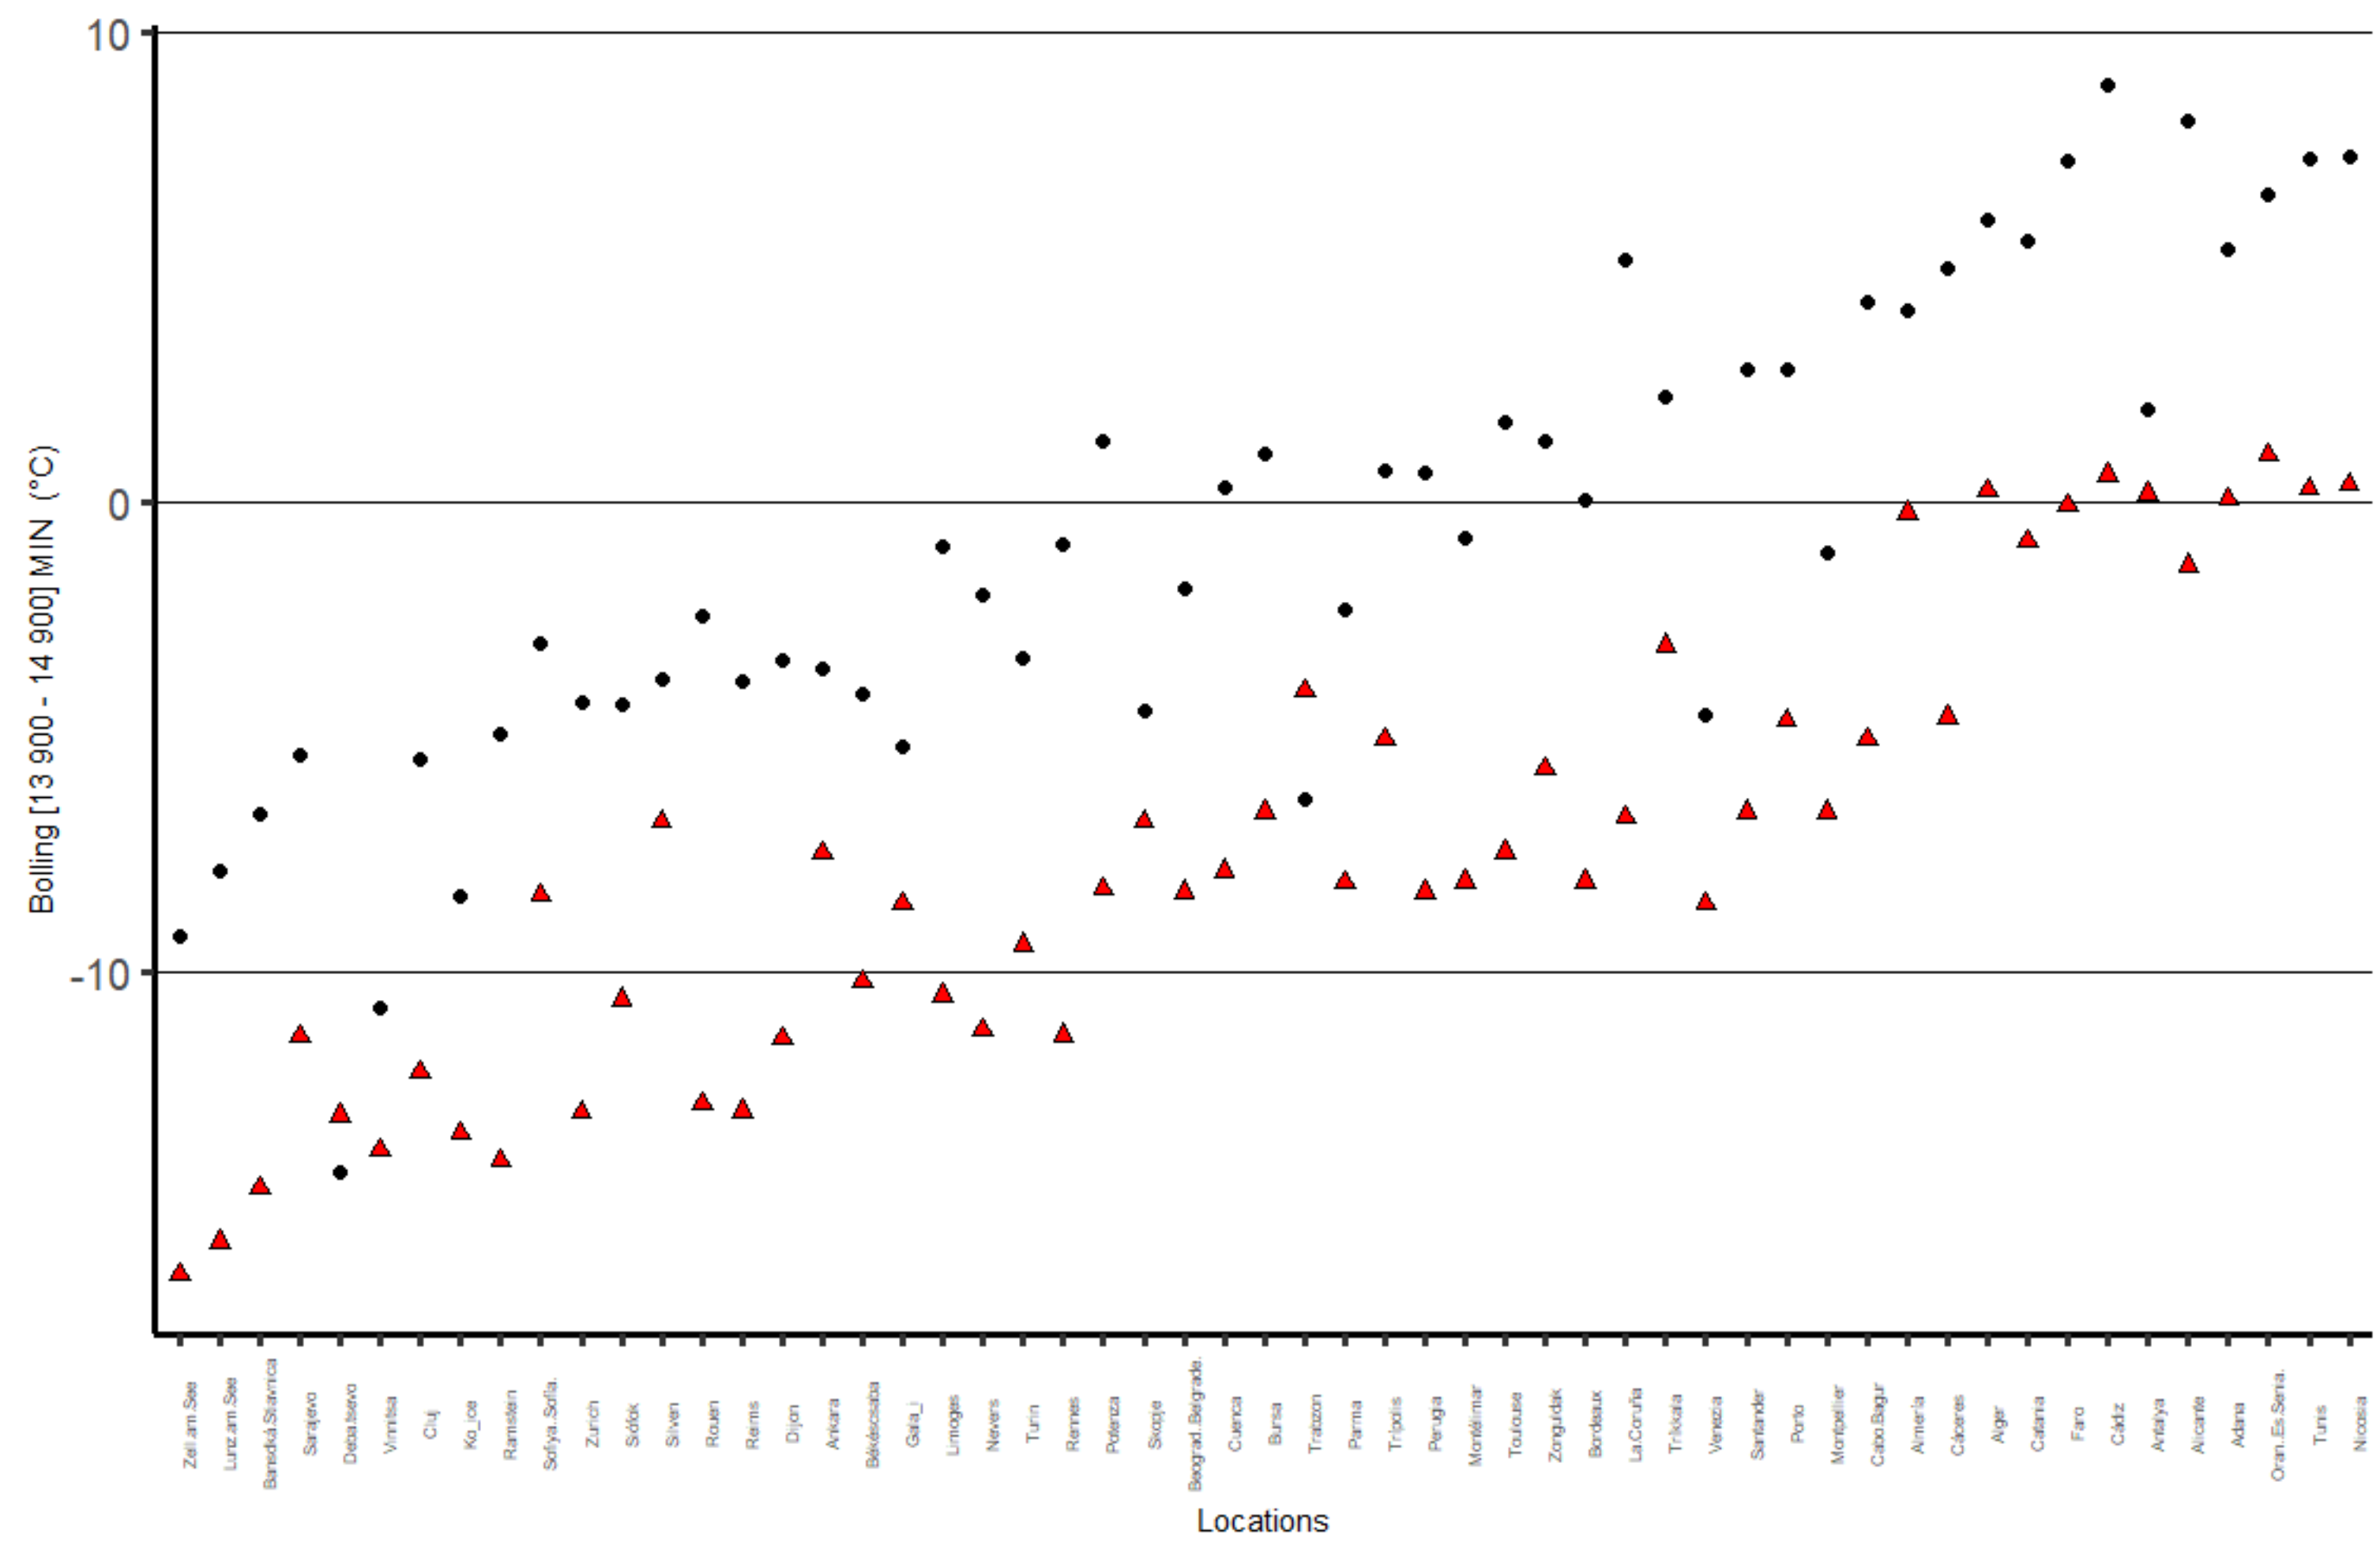

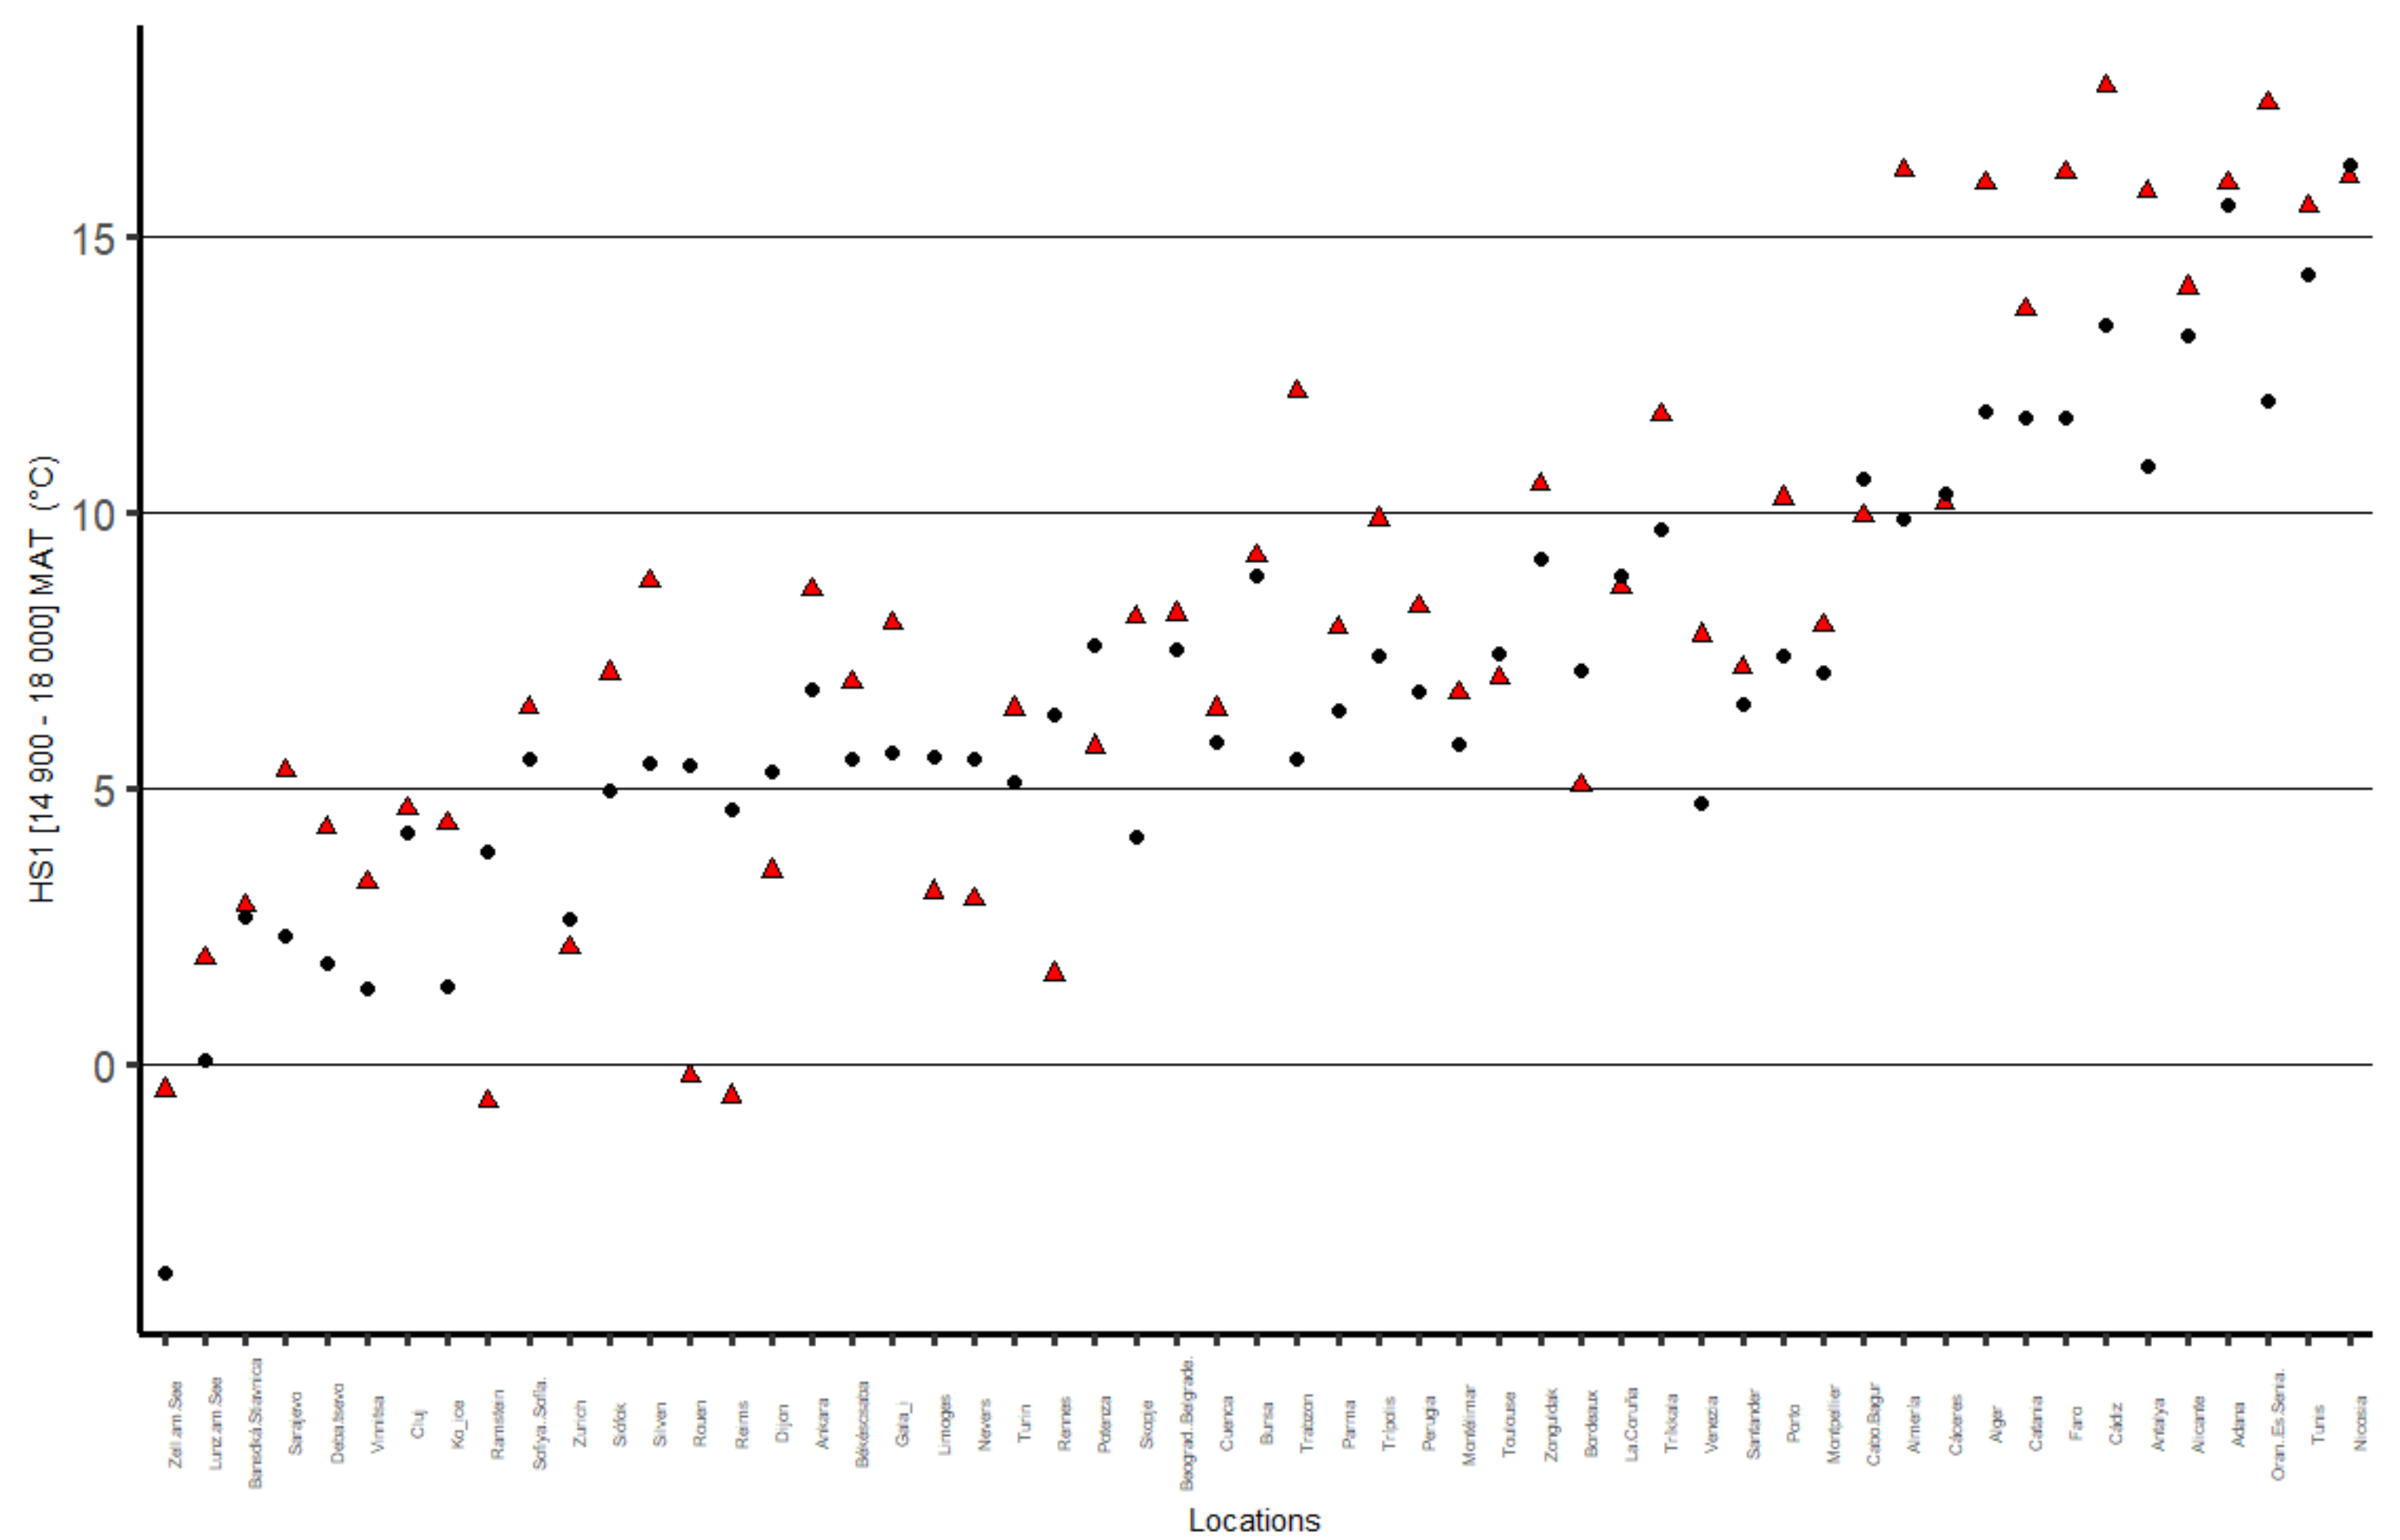

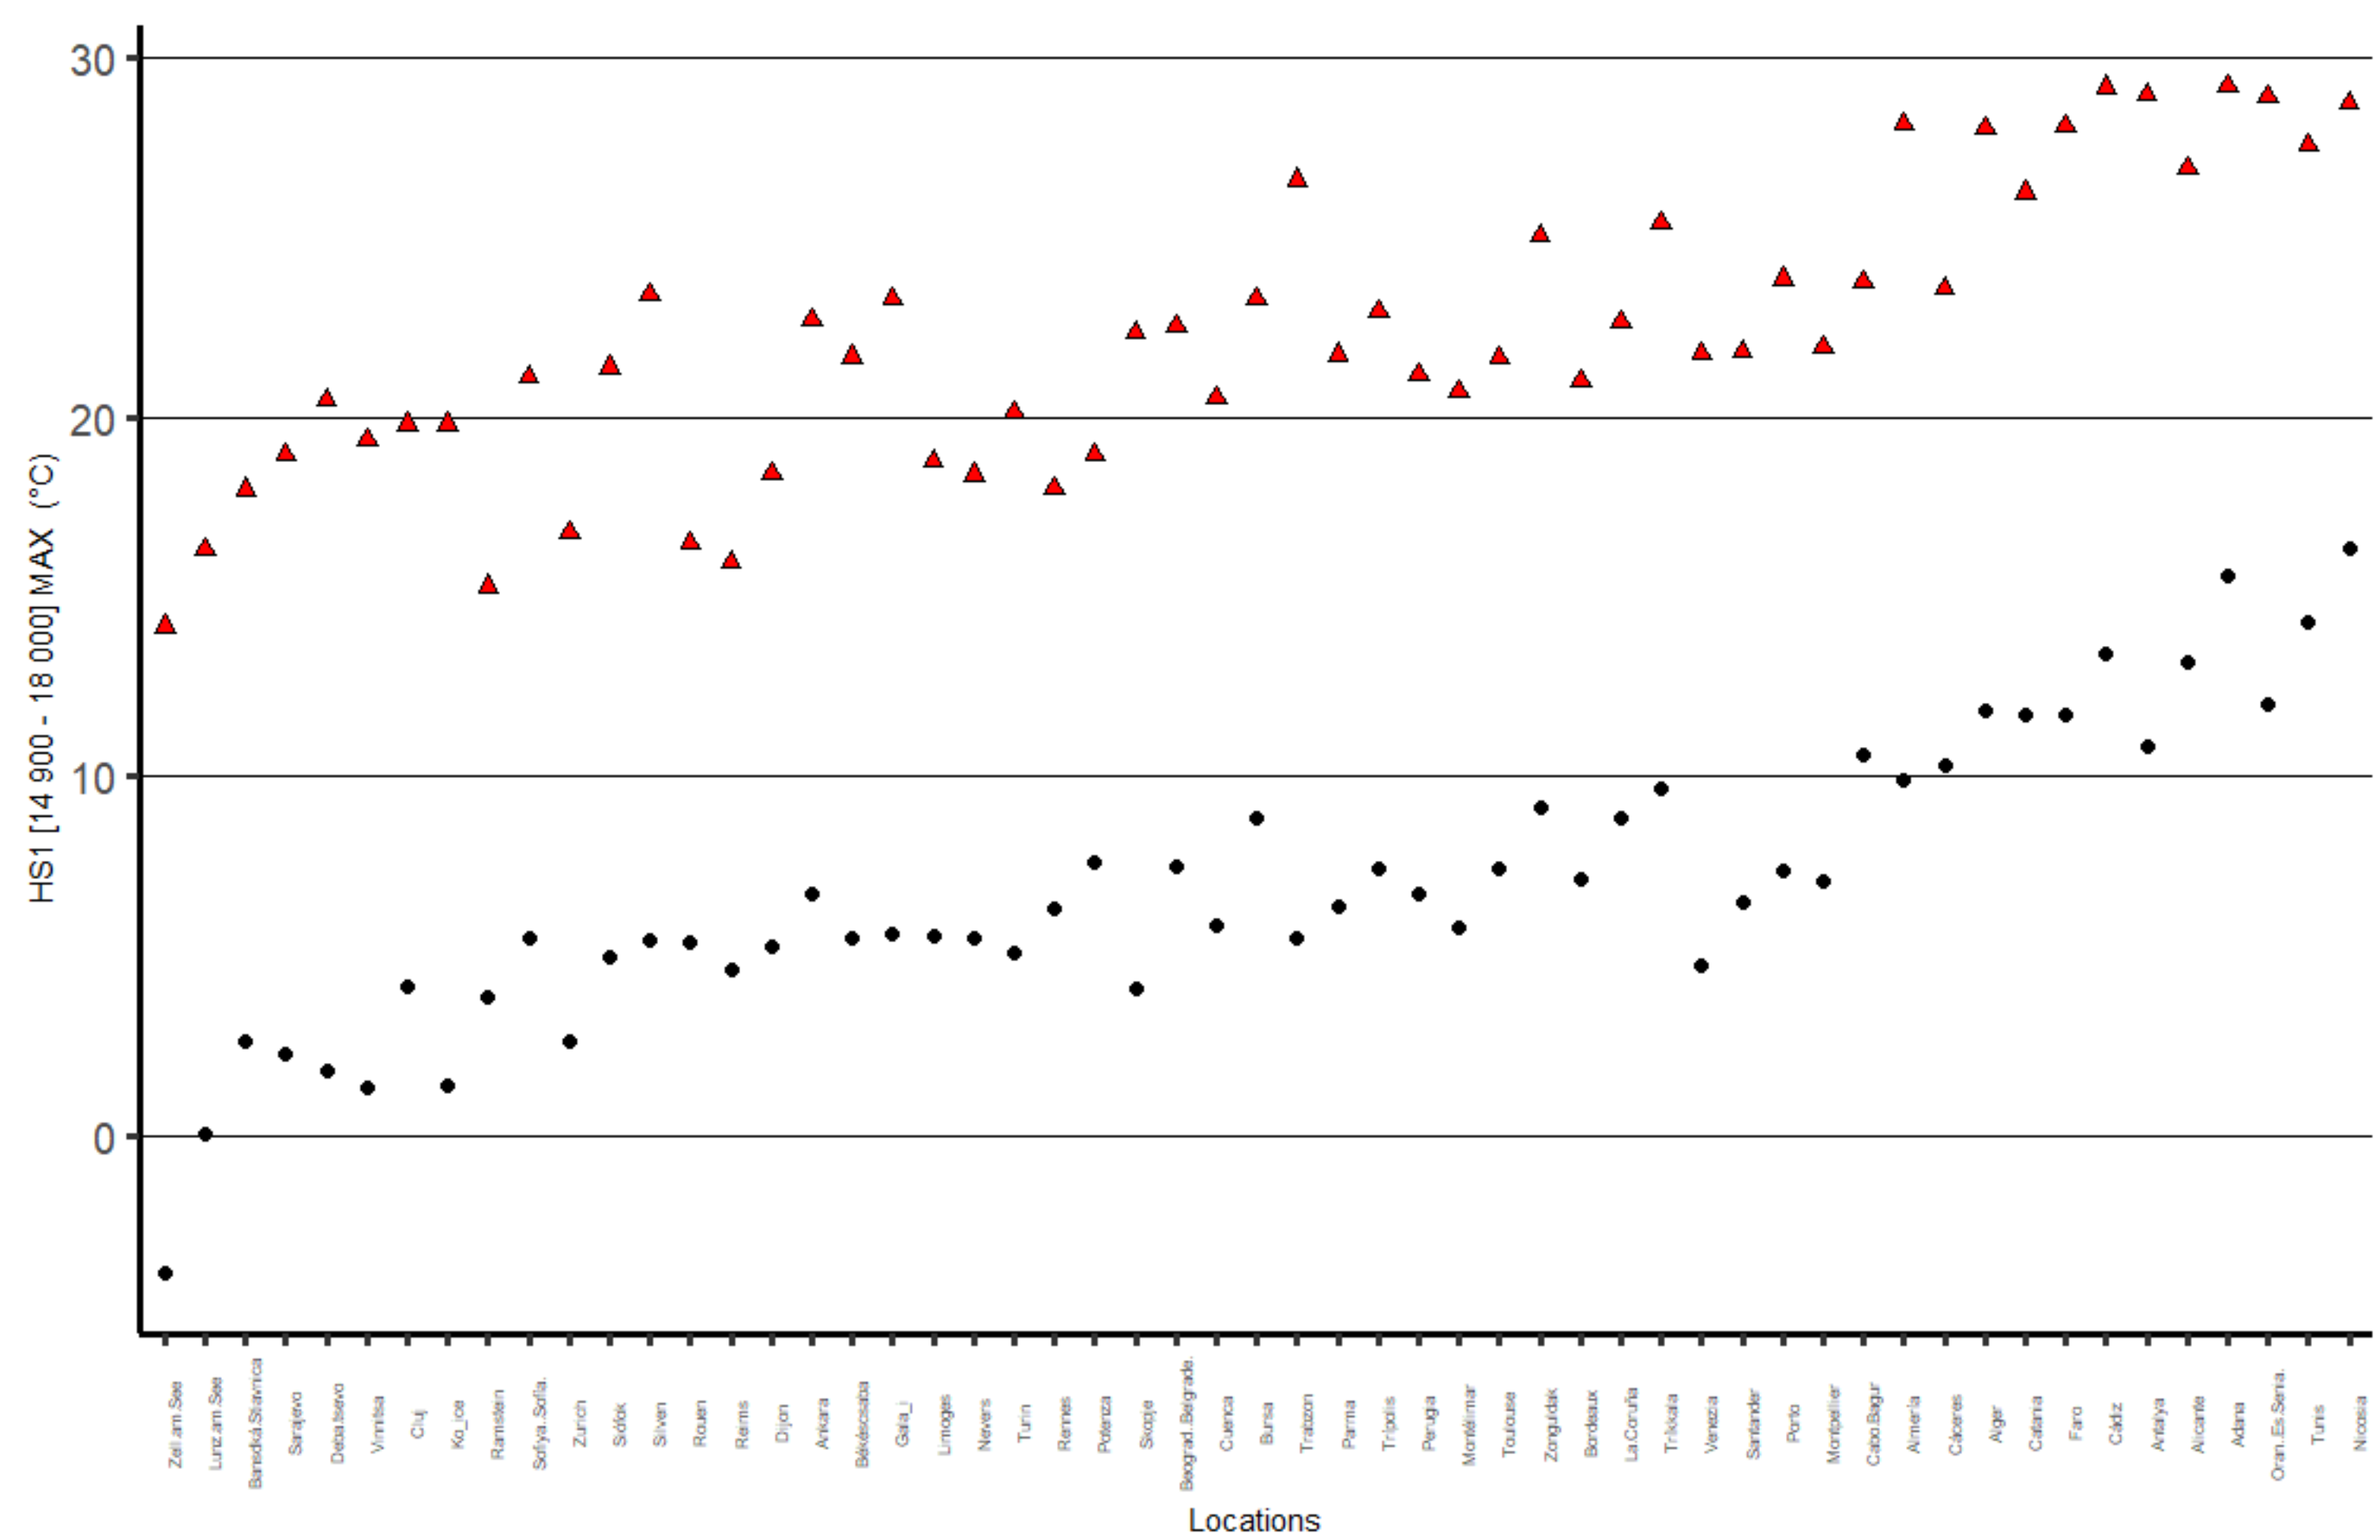

HS1 [14 900 - 18 000] MIN (°C)

5  
0  
-5  
-10  
-15

Locations

Zell am See  
Lunz am See  
Benedikt-Stavrica  
Sarajevo  
Debatsevo  
Vinnisa  
Cluj  
Ko\_ice  
Ramstein  
Sofiya.Sofia.  
Zurich  
Sofok  
Sliven  
Rouen  
Remis  
Dijon  
Ankara  
Bekescsaba  
Gala\_J  
Limoges  
Nevers  
Turin  
Rennes  
Poznan  
Skopje  
Beograd.Belgrade.  
Cuenca  
Bursa  
Trabzon  
Parna  
Tripolis  
Perugia  
Montelimar  
Toulouse  
Zonguldak  
Bordeaux  
La.Coruña  
Trikala  
Venezia  
Santander  
Porto  
Montpellier  
Cabo.Bagur  
Almeria  
Caleres  
Alger  
Catania  
Faro  
Cadiz  
Antalya  
Alicante  
Adana  
Oran.Es.Senia.  
Tunis  
Nicosia

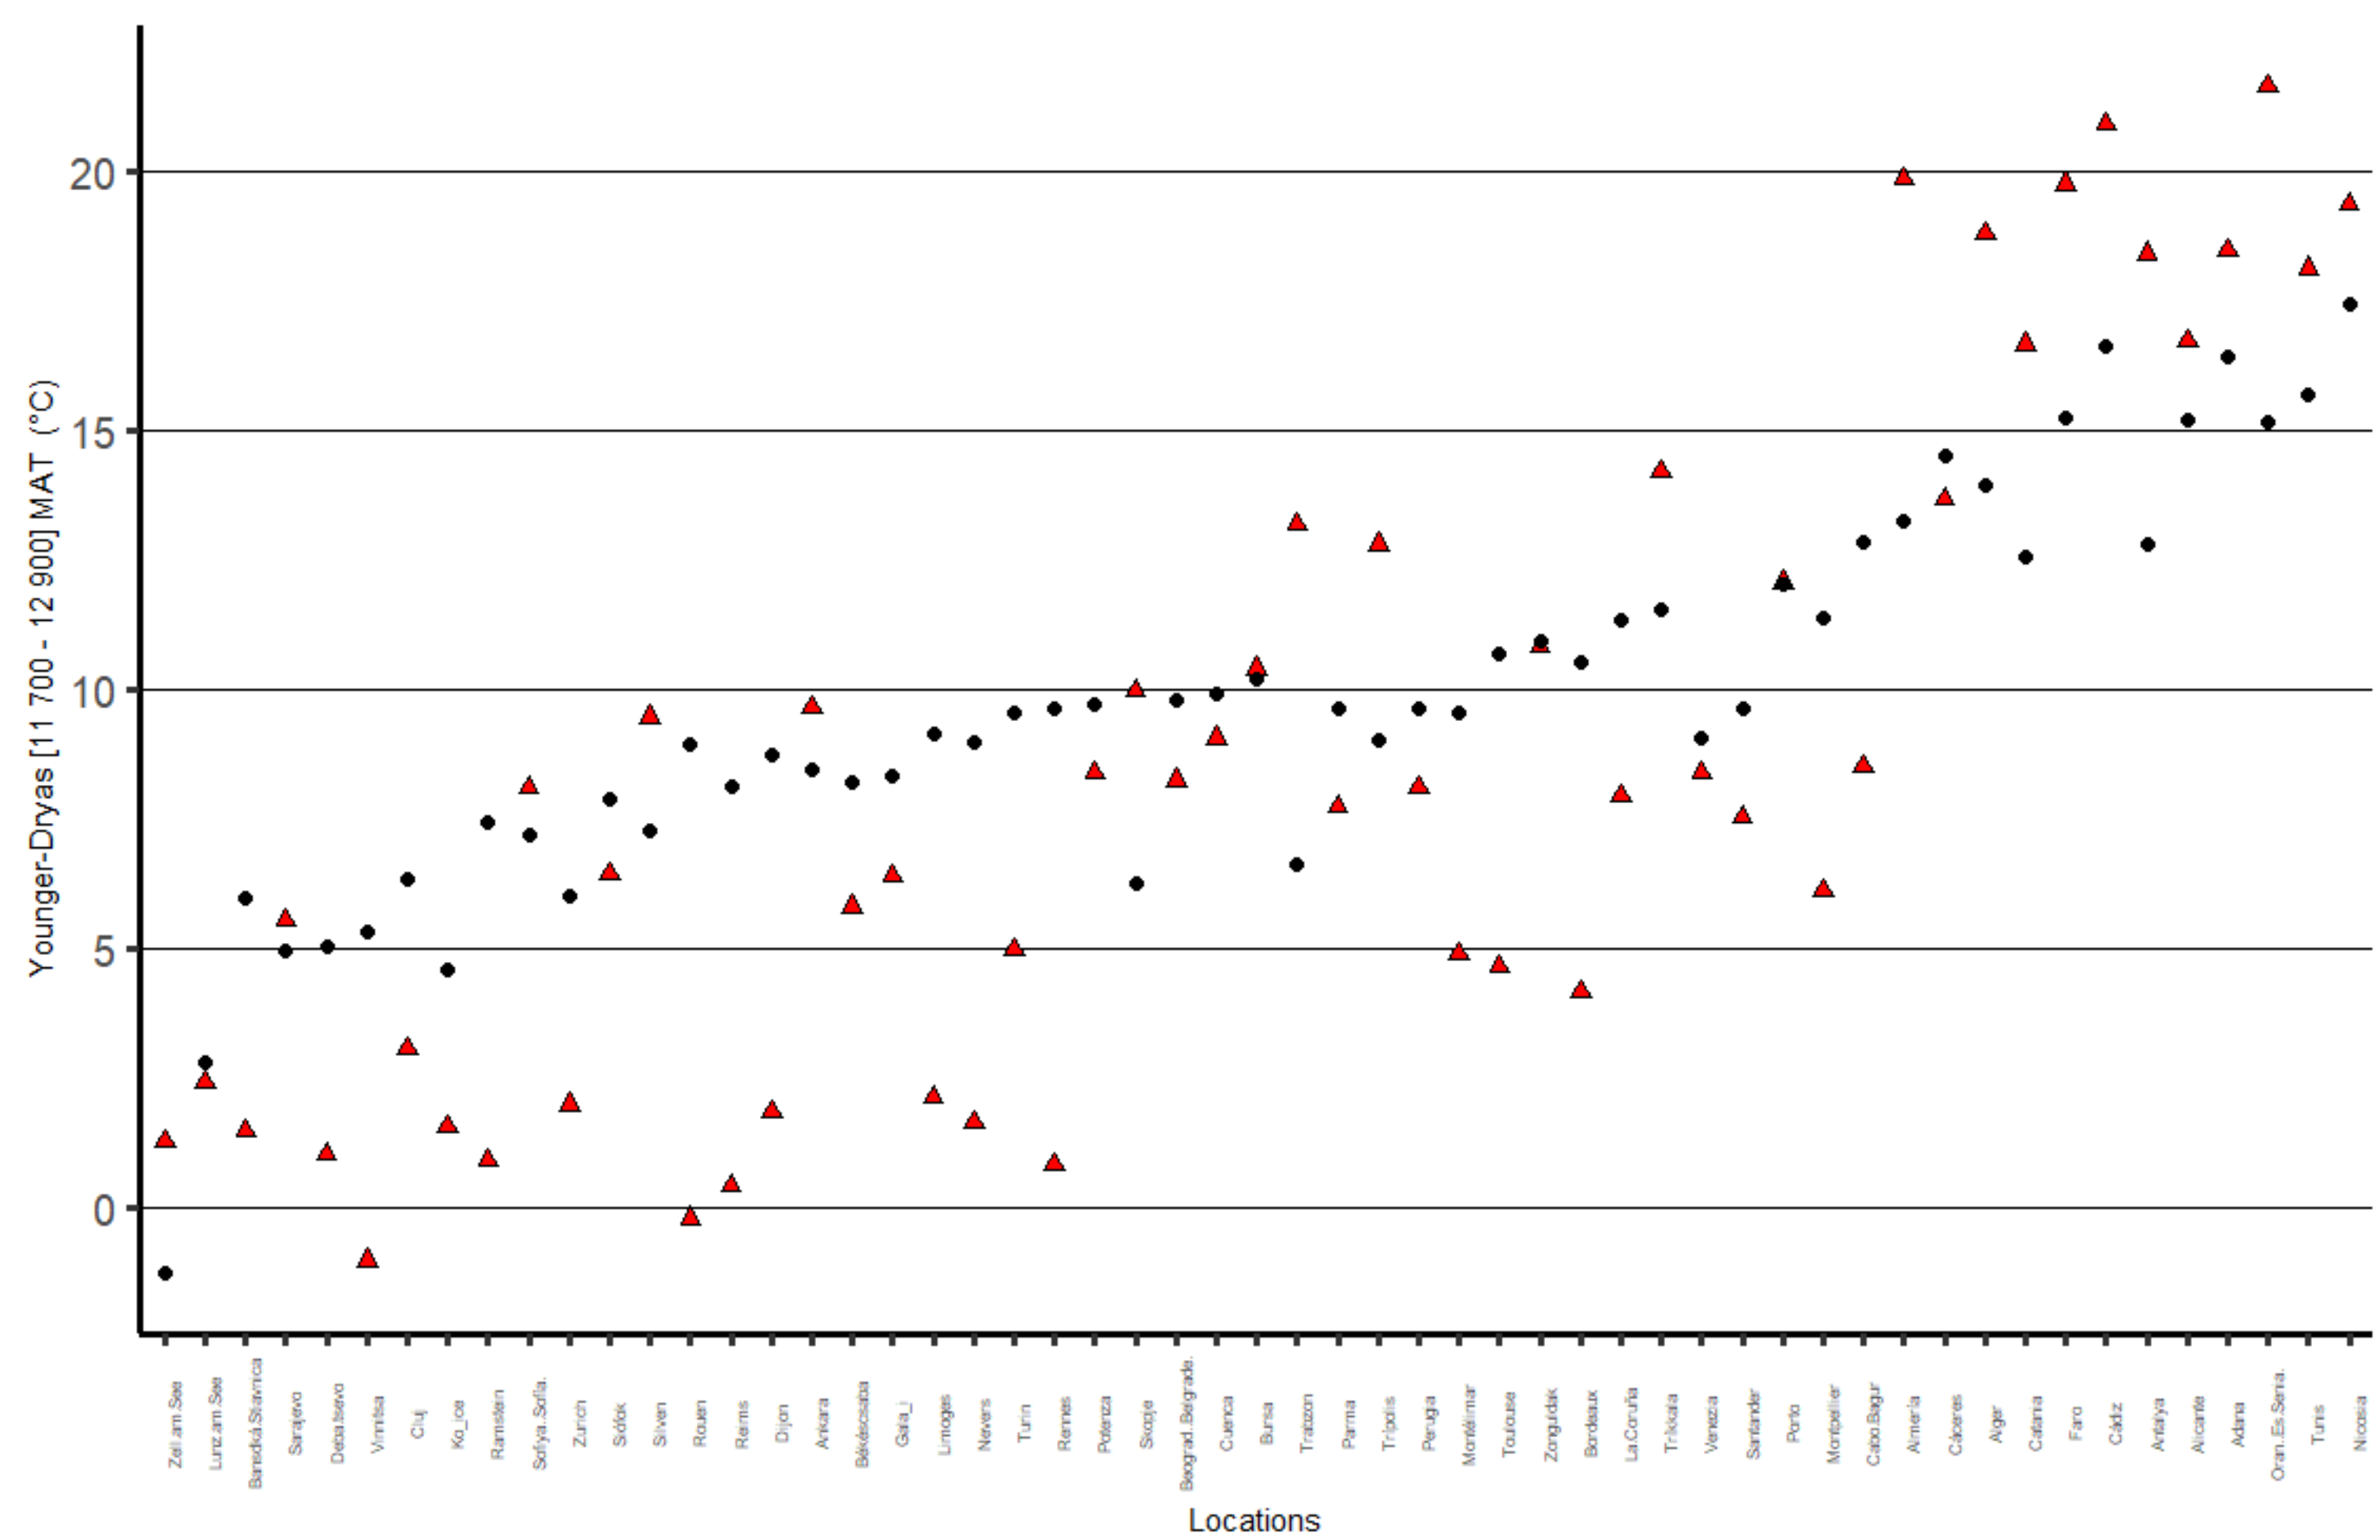

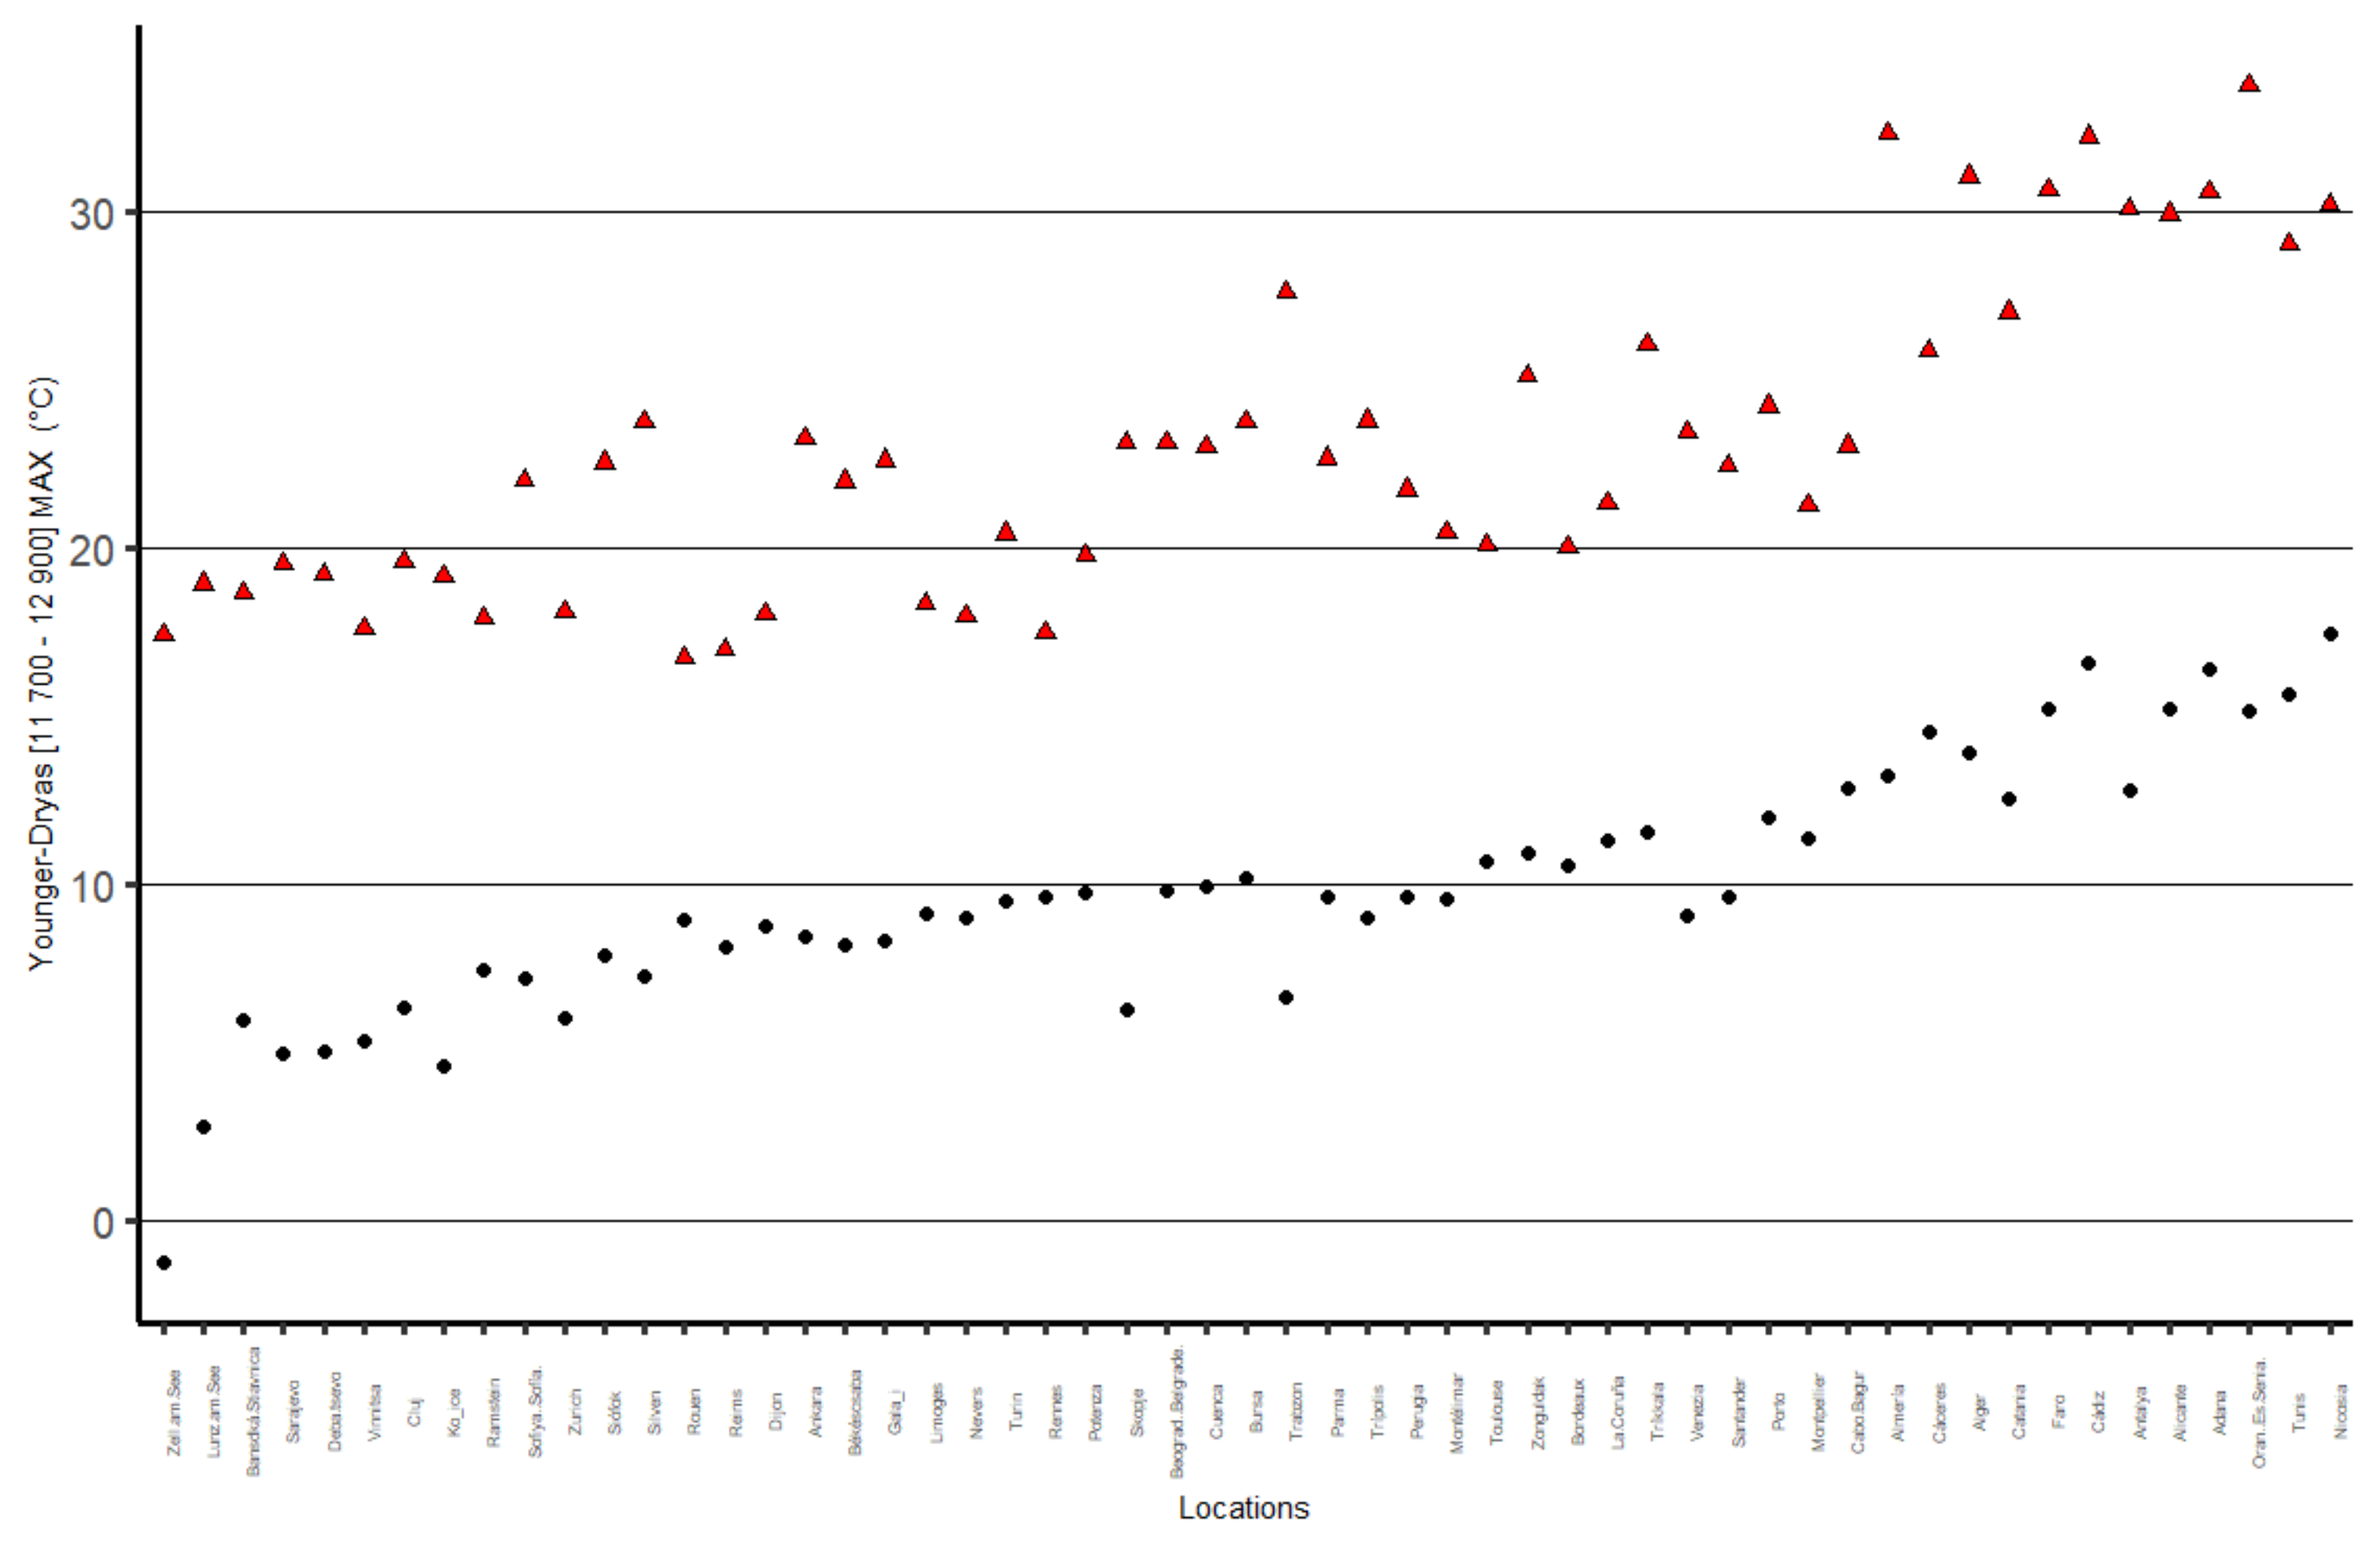

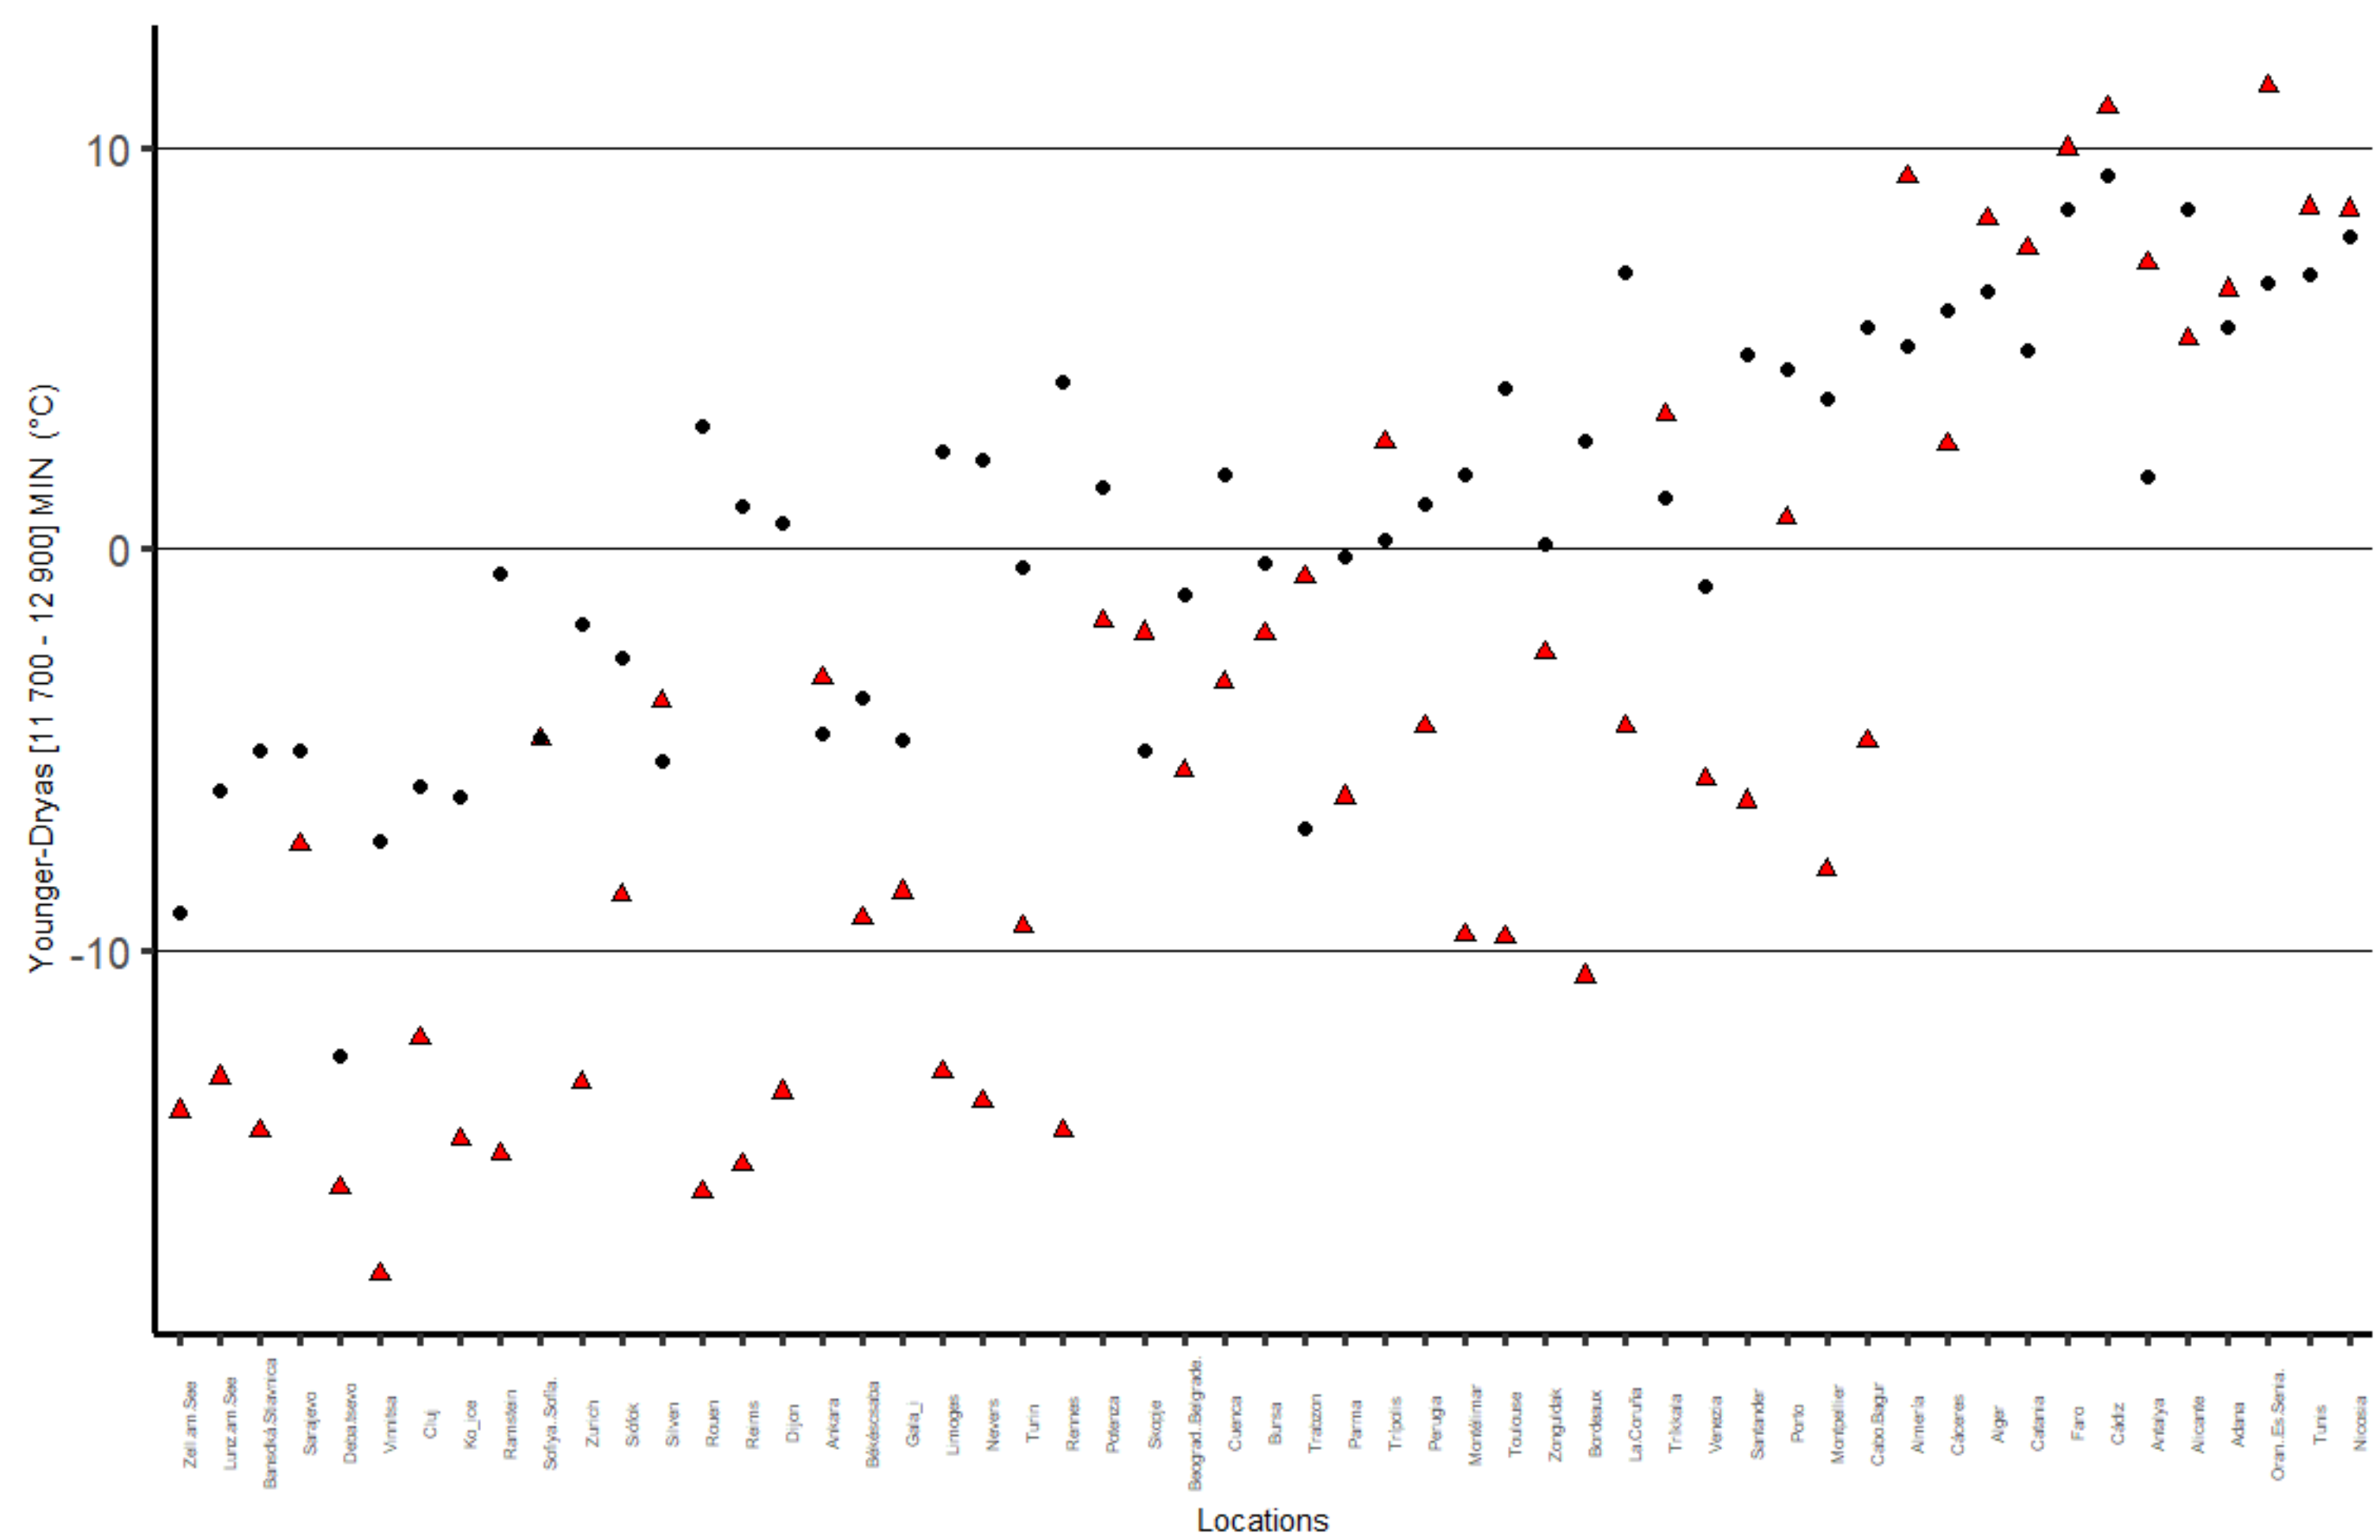

Supplement: Supplementary file 2 [file Fig. S2.pdf › Supplement/Fig. S2.pdf]
