# Supplementary material for: Late Pleistocene temperature patterns in the Western Palearctic: insights from rodent associations compared with general circulation models
Source: Copernicus journal article supplement (doi:10.5194/cp-21-1821-2025), 2025-10-23

LOOCV S.D. MAT (°C)

LOOCV S.D. MTWA (°C)

LOOCV S.D. MTCO (°C)

Present Day

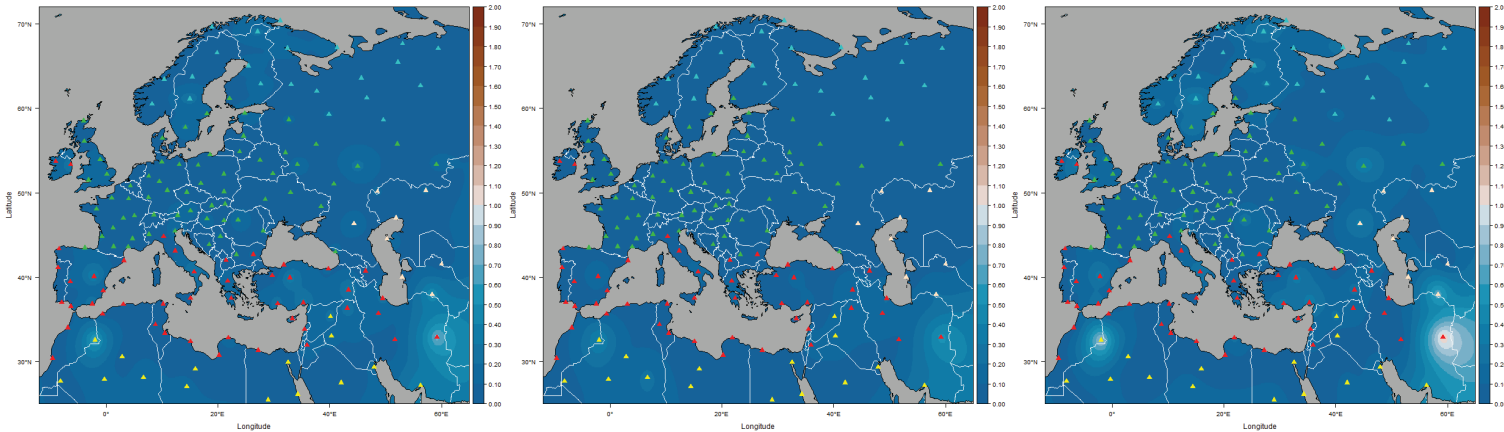

Younger Dryas  
(12 900 - 11 700)

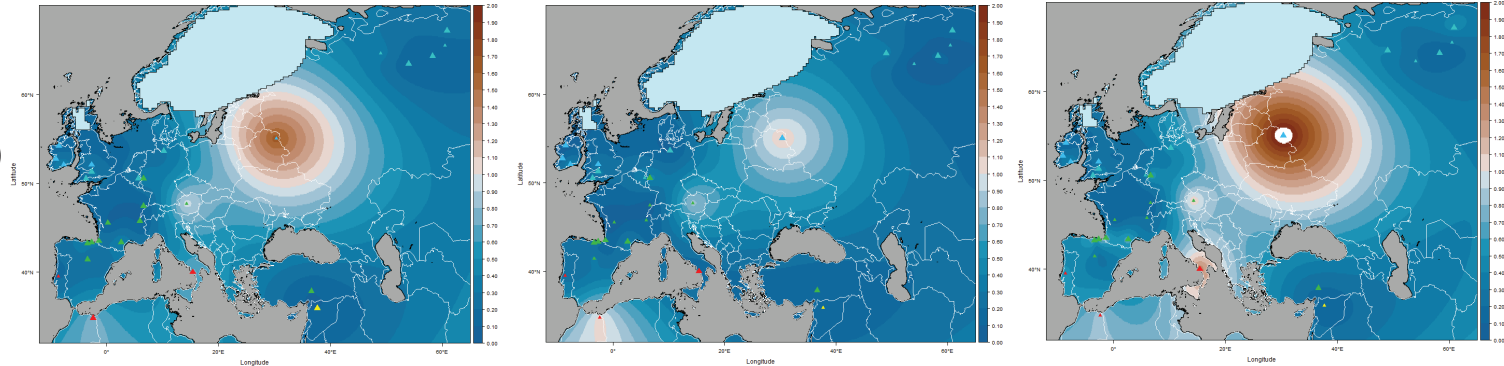

Allerød  
(13 900 - 12 900)

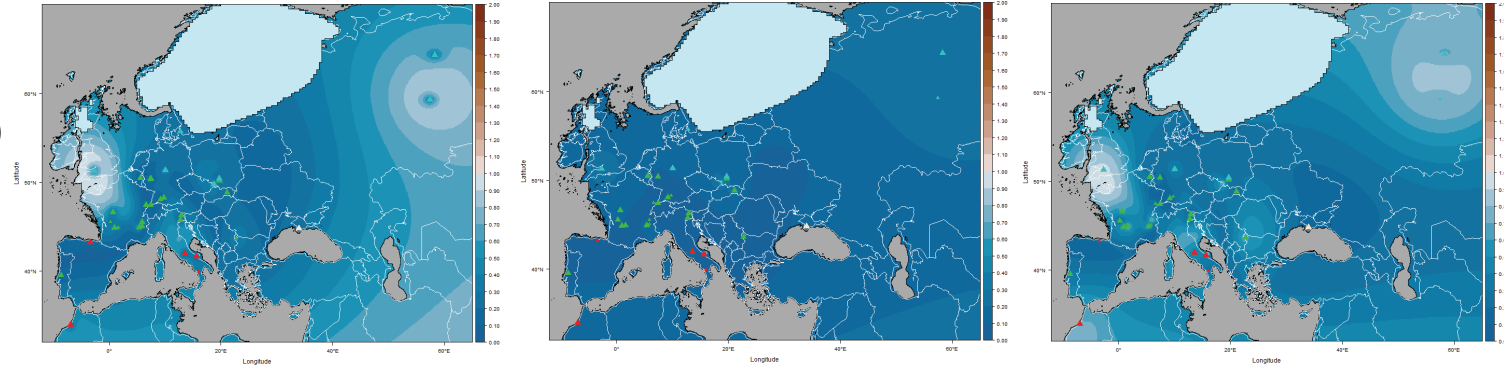

Bølling  
(14 900 - 13 900)

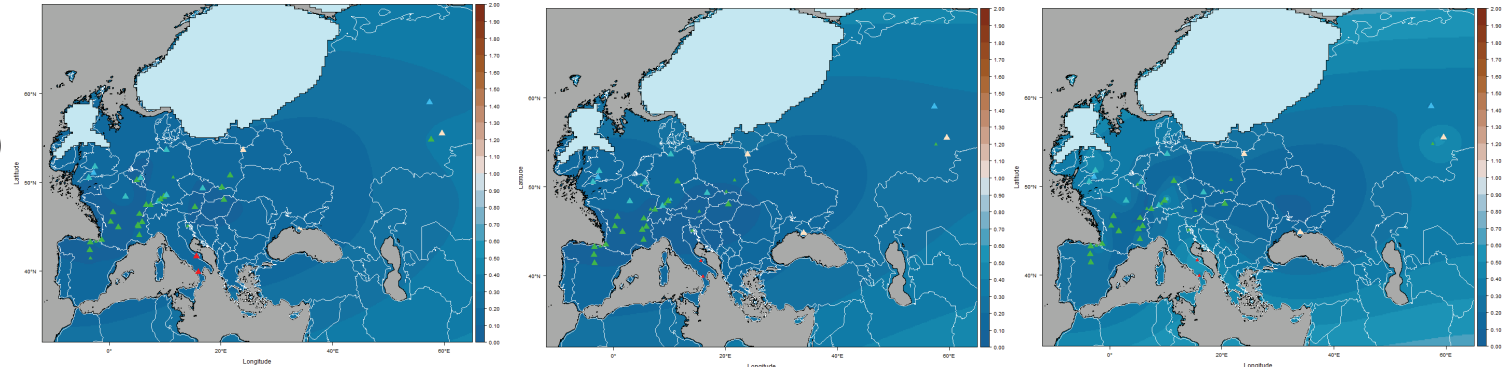

Heinrich stadial  
(18 000 - 13 900)

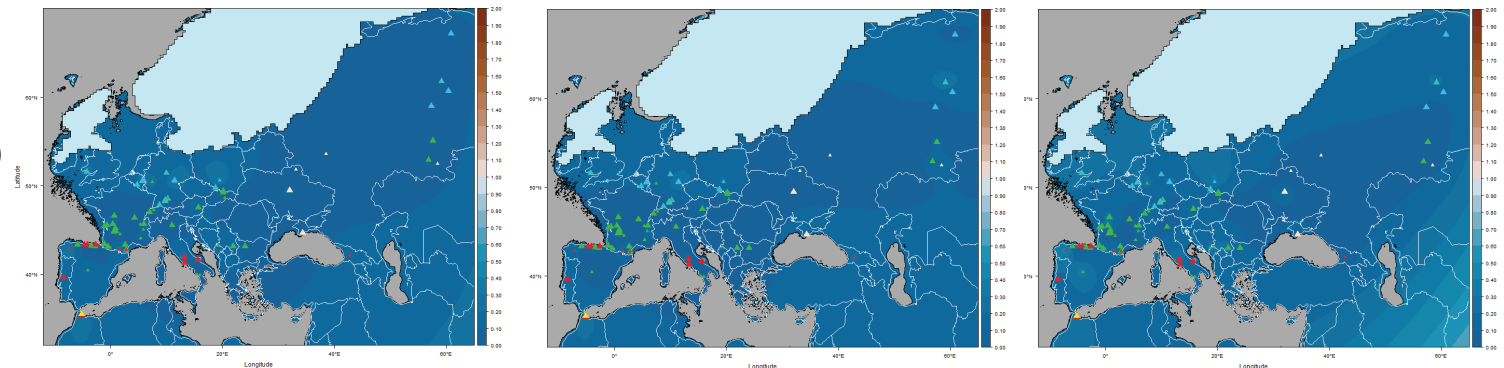

LGM  
(23 000 - 18 000)

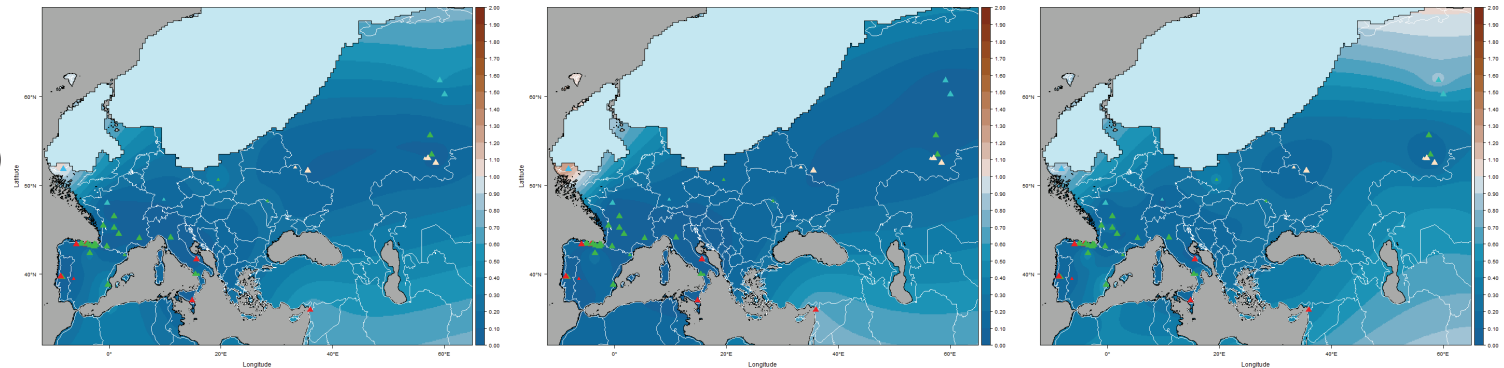

Supplement: Supplementary file 1 [file Fig. S1.pdf › Supplement/Fig. S1.pdf]
