# Supplementary material for: Late Pleistocene temperature patterns in the Western Palearctic: insights from rodent associations compared with general circulation models
Source: Copernicus journal article supplement (doi:10.5194/cp-21-1821-2025), 2025-10-23
Supplement: Supplementary file 1 [file Table S1.xlsx]

## Sheet: Feuil1
Locality	Latitude	Longitude	Elevation (m)	Modern climatic zone
Alicante*	38.37	-0.5	81	III (III/IV)
Almería*	36.83	-2.47	6	III
Cabo Bagur*	41.95	3.25	110	IV
Cáceres*	39.48	-6.37	460	IV
Cádiz*	36.53	-6.3	14	IV
Cuenca*	40.07	-2.13	944	IV
La Coruña*	43.37	-8.42	58	IV (IV/V)
Santander*	43.47	-3.82	66	V
Faro*	37.02	-7.92	36	IV
Porto*	41.13	-8.6	95	IV
Bordeaux*	44.83	-0.7	46	V
Dijon*	47.27	5.1	220	VI
Limoges*	45.82	1.28	282	VI
Montélimar*	44.58	4.73	73	VI
Montpellier*	43.58	3.97	5	IV
Nevers*	47	3.1	176	VI
Reims*	49.3	4.03	94	VI
Rennes*	48.07	-1.72	35	VI
Rouen*	49.38	1.05	68	VI
Toulouse*	43.62	1.37	151	VI
Bruxelles	50.8	4.35	100	VI
Ramstein*	49.43	7.6	238	VI
Coburg	50.27	10.93	336	VI
Hamburg	53.63	10	22	VI
Kassel	51.33	9.52	198	VI
Munster	51.97	7.62	66	VI
Neustreliz	53.35	13.08	64	VI
Parma*	44.8	10.32	57	VI (IV/VI)
Potenza*	40.63	15.77	823	IV
Turin*	45.07	7.67	238	VI (IV/VI)
Venezia*	45.45	12.32	1	VI
Catania*	37.5	15.1	45	IV
Perugia*	43.12	12.35	493	VI
Geilo	60.53	8.22	795	VIII
Tromso	69.65	18.95	102	VIII
Trondhein	63.43	10.42	58	VI
Vardo	70.37	31.1	10	VIII
Cambridge	52.2	0.13	12	VI
Stirling	56.12	-3.93	46	VI
Strathy	58.52	-4.02	37	VI
York	53.95	-1.08	17	VI
Lunz am See*	47.85	15.07	615	VI
Zell am See*	47.32	12.8	754	VI
Halviken	63.73	15.45	495	VI
Rättvik_Hamra	60.87	15.1	162	VI
Jokkmolk	66.6	19.85	257	VIII (VI/VIII)
Stockholm	59.35	18.07	44	VI
Jonkoping	57.77	14.18	92	VI
Zurich*	47.38	8.55	493	VI
Pori_Niinisalo	61.45	21.78	501	VII (VI/VII)
Inari	69.07	27.1	149	VIII
Kuopio	62.9	27.68	110	VIII (VI/VIII)
Oulu	65.02	25.48	17	VIII
Gdynia	54.52	18.55	5	VI
Sandomierz	50.12	21.13	200	VI
Warszawa	52.22	21.05	110	VI
Wroclaw	51.13	16.98	116	VI
Walcz	53.28	16.47	616	VI
Claremorris (Clar Chloine Mhuiris)	53.72	-8.98	69	VI
Dublin	53.37	-6.35	68	VI
Strommen	56.45	10.05	4	VII (VI/VII)
Sliven*	42.68	26.32	265	IV
Sofiya (Sofía)*	42.7	23.33	550	VII (VI/VII)
Bansdká Stiavnica*	48.47	18.9	585	VI
Košice*	48.7	21.27	232	VI
Praha (Prague)	50.07	14.43	262	VII
Tríkkala*	39.55	21.77	149	IV
Trípolis*	37.52	22.35	661	IV
Békéscsaba*	46.68	21.08	87	VII (VI/VII)
Siófok*	46.9	18.05	112	VII (VI/VII)
Akureyri1	65.68	-18.25	7	VIII
Cluj*	46.77	23.6	315	VII (VI/VII)
Gala?i*	45.45	28.13	63	VII
Cardiff	51.5	-3.17	62	VI
Aleksandrov Gay	50.15	48.55	25	VII
Bryansk/Ordzhoni	53.33	34.23	604	VI
Deba'tsevo*	48.35	38.43	334	VII (VI/VII)
Kamennaya Step'	51.05	40.7	194	VII (VI/VII)
Kandalaksha	67.13	32.43	26	VIII
Kaunas	54.88	23.88	75	VII (VI/VII)
Khoseda-Khard	67.08	59.38	81	IX
Kirov	58.65	49.62	164	VIII (VI/VIII)
Kirovabad	40.72	46.42	303	VII (IV/VII)
Kolodozero	62.05	37.65	128	VIII (VI/VIII)
Kotlas	61.23	46.63	69	VIII (VI/VIII)
Lubny	50.02	33	156	VII
Magnitogorsk	53.35	59.08	459	VIII (VI/VIII)
Minsk	53.87	27.53	234	VIII (VI/VIII)
Moskva (Moscow)	55.75	37.57	156	VIII (VI/VIII)
Nar'yan-Mar	67.65	53.02	7	VIII (VIII/IX)
Penza	53.13	45.02	532	VII (VI/VII)
Elista	46.32	44.3	178	VII
Smolensk	54.75	32.07	241	VIII (VI/VIII)
Sovdozero	62.83	33.13	538	VIII
Sura	63.58	45.63	599	VIII
Tallinn	59.42	24.8	44	VII (VI/VII)
Tersko-Orlovskij	67.2	41.32	415	VIII
Tome	56.72	24.62	696	VI
Ust'-Tsil'ma	65.45	52.17	27	VIII
Vasilevichi	52.25	29.83	140	VII (VI/VII)
Vereb'yë	58.68	32.7	116	VIII (VI/VIII)
Vinnitsa*	49.23	28.47	287	VI
Vologda	59.28	39.87	118	VIII (VI/VIII)
Troitsko-Pechorskiy	62.7	56.2	107	VIII
Yelabuga	55.77	52.07	555	VII (VI/VII)
Beograd (Belgrade)*	44.8	20.47	132	VII (VI/VII)
Sarajevo*	43.87	18.43	630	VI
Skopje*	41.98	21.47	240	IV
Tarfaya	27.93	-13	5	III
Agadir	30.38	-9.57	20	III
Rabat	34	-6.83	65	IV
Tindouf	27.67	-8.13	401	III
Bouârfa	32.57	-1.97	1310	III
Oran (Es-Senia)*	35.62	-0.6	90	IV
Adrar	27.88	-0.28	263	III
El-Golea	30.57	2.87	397	III
Alger*	36.8	3.05	50	IV
Bordj Omar Driss (Fort Flatters)	28.1	6.7	353	III
Gafsa	34.42	8.82	313	III
Tunis*	36.83	10.23	3	IV
Medenine	33.35	10.48	110	III
Sebha	27.02	14.43	440	III
Hun	29.13	15.93	207	III
Misratah (Misuráta)	32.38	15.08	10	III (III/IV)
Ajdâbiyah (Agedabia)	30.75	20.22	59	III
Shahhat (Cyrene)	32.82	21.87	436	IV
Dakhla	25.48	29	111	III
Marsa Matrûh	31.33	27.22	30	III
Quseir	26.13	34.3	11	III
Suez	29.93	32.55	11	III
Amman	31.95	35.95	771	IV
Hail	27.5	42.03	971	III
Rutbah	33.03	40.28	615	III
Kuwait (Shuwaikh)	29.33	47.95	11	III
Bandar Abbas	27.18	56.28	9	III
Birjand	32.87	59.2	1459	VII (III/VII)
Esfahan	32.62	51.67	1598	VII (III/VII)
Hamadan	35.7	48.72	1644	VII
Mosul	36.31	43.15	222	IV
Deir Ezzor	35.33	40.15	203	III
Beyrouth	33.82	35.48	16	IV
Nicosia*	35.09	33.28	217	IV
Adana*	36.98	35.3	66	IV
Antalya*	36.88	30.7	43	IV
Bursa*	40.18	29.7	100	IV
Zonguldak*	41.45	31.8	42	V
Ankara*	39.95	32.88	894	VII
Trabzon*	41	39.72	108	IV (IV/V)
Sukhumi	43	41.02	4	VI
Van	38.5	43.38	1661	VII
Pahlavi (Bandar Anzali)	37.47	49.47	-15	IV (IV/V)
Asabad	37.97	58.33	230	VII (III/VII)
Urgench	41.55	60	91	VII
Krasnovodsk	40	52.98	21	VII (III/VII)
Tyub-Karagan (Fort Schevchenko)	44.55	50.28	124	VII
Gur'ev (Atyrau)	47.02	51.85	-21	VII
Aktobe	50.28	57.17	226	VII
