# Supplementary material for: Late Pleistocene temperature patterns in the Western Palearctic: insights from rodent associations compared with general circulation models
Source: Copernicus journal article supplement (doi:10.5194/cp-21-1821-2025), 2025-10-23

$\Delta$  BEYER2020

between periods

MAT (°C)

MTWA (°C)

MTCO (°C)

Present day

Younger Dryas  
[12 900 - 11 700]

Younger Dryas  
[12 900 - 11 700]

Allerød  
[13 900 - 12 900]

Allerød  
[13 900 - 12 900]

Bølling  
[14 300 - 13 900]

Bølling  
[14 300 - 13 900]

Heinrich Stadial  
[18 000 - 14 900]

Heinrich Stadial  
[18 000 - 14 900]

LGM  
[23 000 - 18 000]

60°N

50°N

40°N

0° 20°E 40°E 60°E

0° 20°E 40°E 60°E

0° 20°E 40°E 60°E

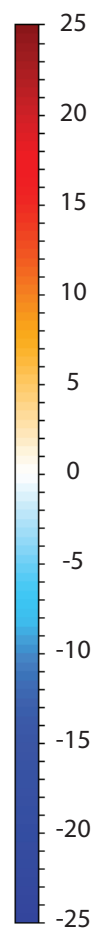

Supplement: Supplementary file 3 [file Fig. S3.pdf › Supplement/Fig. S3.pdf]
