# Supplementary material for: Late Pleistocene temperature patterns in the Western Palearctic: insights from rodent associations compared with general circulation models
Source: Copernicus journal article supplement (doi:10.5194/cp-21-1821-2025), 2025-10-23
Supplement: Supplementary file 4 [file captions of supplement.docx]

• Fig. S1.pdf : Illustration of LOOCV calculation results.

• Fig. S2.pdf : Estimations of MTCO, MAT, MTWA (°C) of the 55 localities, which was not impacted by ice sheet development per period, from rodents () and Beyer2020 (), as well as anomaly estimations between period and modern period.

• Fig. S3.pdf : Differences in MAT, MTWA and MTCO between each successive time periods in Beyer2020 estimations.

• Table S1.xlsx : List of the modern localities with their spatial coordinates and their modern climatic zone.

• Table S2.xlsx : List of rodent localities associated with their bioclimatic sprectum and faunal list.

• Table S3.csv : Rodent CRI values added for this study.

• Supplement S1 : R scripts and raw data used for rodent model calculations.
