# Supplementary material for: Late Pleistocene temperature patterns in the Western Palearctic: insights from rodent associations compared with general circulation models
Source: Copernicus journal article supplement (doi:10.5194/cp-21-1821-2025), 2025-10-23
Supplement: Supplementary file [file cp-21-1821-2025-supplement-title-page.pdf › cp-21-1821-2025-supplement-title-page.pdf]

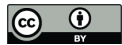

## *Supplement of*

# **Late Pleistocene temperature patterns in the Western Palearctic: insights from rodent associations compared with general circulation models**

**Aurélien Royer et al.**

*Correspondence to:* Aurélien Royer (aurelien.royer@u-bourgogne.fr)

- cp-21-1821-2025-supplement-title-page.pdf
- Supplement
  - Fig. S1.pdf
  - Fig. S2.pdf
  - Fig. S3.pdf
  - Supplement S1
    - \* ALRO.iso.csv
    - \* ALRO.iso\_altCOR.csv
    - \* BOL.iso.csv
    - \* BOL.iso\_altCOR.csv
    - \* Beyer extraction data.R
    - \* ElevEurope.modern.tif
    - \* ElevEurope.tif
    - \* Europe\_spatial\_interp\_iso.mat\_LGM.iso\_altCOR.rds
    - \* HE.iso.csv
    - \* HE.iso\_altCOR.csv
    - \* Interpolation\_Alt.cor\_MAT - Modern .png
    - \* LGM.iso.csv
    - \* LGM.iso\_altCOR.csv
    - \* LOOCV script.R
    - \* Modern157.estimation.iso.csv
    - \* Modern157.estimation.iso\_altCOR-outlier2.csv
    - \* PalBerV2.R
    - \* Script\_IUCN intersect.R
    - \* Utils\_Iso.R
    - \* YD2.iso.csv
    - \* YD2.iso\_altCOR.csv

- \* bioclimatic spectra and climate.csv
- \* data\_species\_biozone.csv
- \* finalMap\_bathi\_ALRO.rda
- \* finalMap\_bathi\_BOL.rda
- \* finalMap\_bathi\_HE.rda
- \* finalMap\_bathi\_LGM.rda
- \* finalMap\_bathi\_YD.rda
- \* finalMap\_ice\_ALRO.rda
- \* finalMap\_ice\_BOL.rda
- \* finalMap\_ice\_HE.rda
- \* finalMap\_ice\_LGM.rda
- \* finalMap\_ice\_YD.rda
- \* script.R
- Table S1.xlsx
- Table S2.xlsx
- Table S3.csv
- captions of supplement.docx

The copyright of individual parts of the supplement might differ from the article licence.
